# Supplementary material for: π-Curved Blatter radicals: Blatter helicenes
Source: Royal Society of Chemistry journal article supplement (doi:10.1039/d4cc05704j), 2024-11-26
Supplement: d4cc05704j1.pdf [file d4cc05704j1.pdf]

Electronic Supplementary Information  
For  
 **$\pi$ -Curved Blatter radicals: Blatter helicenes**

Hemant K. Singh,<sup>a</sup> Agnieszka Bodzioch,<sup>a</sup> Anna Pietrzak,<sup>b</sup> and Piotr Kaszyński<sup>a,c</sup>

<sup>a</sup> *Organic Materials Research Group, Centre of Molecular and Macromolecular Studies, Polish Academy of Sciences, Sienkiewicza 112, 90-363 Łódź, Poland*

<sup>b</sup> *Faculty of Chemistry, Łódź University of Technology, 90-924 Łódź, Poland*

<sup>c</sup> *Faculty of Chemistry, University of Łódź, 91-403 Łódź, Poland*

| <b>Table of contents</b>                                                                                         | <b>Page</b> |
|------------------------------------------------------------------------------------------------------------------|-------------|
| 1. Additional synthetic details                                                                                  | .....S2     |
| 2. NMR spectra                                                                                                   | .....S15    |
| 3. XRD data collection and refinement                                                                            | .....S33    |
| 4. UV-vis spectroscopy                                                                                           | .....S37    |
| 5. Chiral HPLC analysis and resolution                                                                           | .....S39    |
| 6. Electronic circular dichroism spectroscopy                                                                    | .....S40    |
| 7. Electrochemical results                                                                                       | .....S40    |
| 8. EPR spectroscopy                                                                                              | .....S41    |
| 9. Computational details                                                                                         | .....S43    |
| a) geometry optimization and energies for radicals <b>1[n]</b>                                                   | ...S43      |
| b) spin delocalization in radicals <b>1[n]</b>                                                                   | ...S43      |
| c) electronic excitation data for radicals <b>1[n]</b>                                                           | ...S44      |
| d) partial output from TD-DFT calculation for radicals <b>1[n]</b>                                               | ...S44      |
| e) selected MO energies                                                                                          | ...S50      |
| f) TD-DFT calculation of electronic circular dichroism (ECD)<br>results for radicals <b>1[6]</b> and <b>1[7]</b> | ...S51      |
| 10. Archive for DFT calculations                                                                                 | .....S51    |
| 11. References                                                                                                   | .....S56    |

## 1. Additional synthetic details

Products were purified by flash chromatography on silica gel (230–400 mesh, Merck). NMR spectra were recorded in CDCl<sub>3</sub> on AV III 500 MHz Bruker NMR or AV 400 Neo spectrometers. Chemical shifts are reported in  $\delta$  ppm relative to solvent peak (<sup>1</sup>H NMR:  $\delta$  7.26 ppm and <sup>13</sup>C NMR:  $\delta$  77.16 ppm for CDCl<sub>3</sub>).<sup>1</sup> High-resolution mass spectrometry (HRMS) measurements were performed using a G2-Si Waters Synapt HDMS instrument fitted with an atmospheric pressure ionization electrospray source. Melting points were determined on a MEL-TEMP® apparatus and are uncorrected. UV-vis spectra were recorded in spectroscopic grade CH<sub>2</sub>Cl<sub>2</sub> at concentrations in a range of 2–10 x 10<sup>-5</sup> M. Molar extinction coefficients  $\epsilon$  were obtained by fitting the maximum absorbance against concentration in agreement with Beer's law. More details are provided in the SI. Passivated SiO<sub>2</sub> was prepared by suspension in 2% solution of Et<sub>3</sub>N in CH<sub>2</sub>Cl<sub>2</sub> and then evaporation till dryness.

### Photochemical preparation of helicene radicals **1[n]**. General procedure

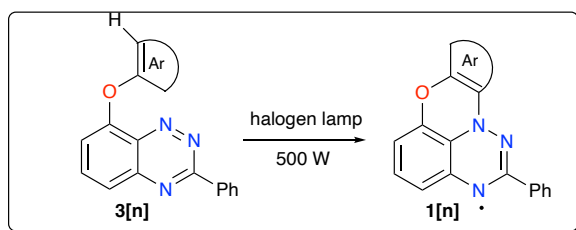

A solution (0.8–1.6 mM) of precursor **3[n]** in dry CH<sub>2</sub>Cl<sub>2</sub> or AcOEt (100–400 mL) was placed in a 500 mL RB flask fitted with a reflux condenser (details in Table S1). The solution was stirred and irradiated with a 500 W halogen lamp, which was set 30 cm from the flask. The irradiation warmed up the reaction mixture to 30–35 °C. Progress of the reaction was monitored by TLC (20% CH<sub>2</sub>Cl<sub>2</sub>/pet. ether) and the irradiation was stopped after 1–4 days. The solvent was evaporated, the residue was adsorbed onto ~ 1.0 g of passivated silica and the unreacted starting material **3[n]** followed by product **1[n]** were separated using a silica gel column passivated with Et<sub>3</sub>N (pet. ether/CH<sub>2</sub>Cl<sub>2</sub>, gradient 0–100%). The radical **1[n]** was recrystallized from toluene. Representative results are collected in Table S1.

**Table S1.** Results for photocyclization of **3[n]** in a Pyrex rb flask with a 500 W halogen lamp.

| helicene                 | scale <b>3[n]</b>  | solvent                         | conc.   | yield <b>1[n]</b> | time | recovered <b>3[n]</b> |
|--------------------------|--------------------|---------------------------------|---------|-------------------|------|-----------------------|
| <b>1[3]</b> <sup>a</sup> | 60 mg              | CH <sub>2</sub> Cl <sub>2</sub> | 1.0 mM  | 24 mg (40%)       | 3 d  | 25 mg (42%)           |
|                          | <sup>b</sup> 60 mg | AcOEt                           | 1.0 mM  | 54 mg (90%)       | 3d   | not present           |
| <b>1[4]</b> <sup>a</sup> | 43 mg              | CH <sub>2</sub> Cl <sub>2</sub> | 1.0 mM  | 15 mg (34%)       | 3d   | not isolated          |
| <b>1[5]</b>              | 110 mg             | CH <sub>2</sub> Cl <sub>2</sub> | 1.35 mM | 11 mg (10%)       | 1 d  | 75 mg (68%)           |
|                          | 109 mg             | CH <sub>2</sub> Cl <sub>2</sub> | 1.35 mM | 24 mg (22%)       | 3 d  | 53 mg (49%)           |
|                          | 260 mg             | CH <sub>2</sub> Cl <sub>2</sub> | 1.63 mM | 37 mg (14%)       | 4 d  | 124 mg (48%)          |
|                          | 110 mg             | AcOEt                           | 1.35 mM | 32 mg (29%)       | 3 d  | 50 mg (45%)           |
| <b>1[6]</b>              | 70 mg              | CH <sub>2</sub> Cl <sub>2</sub> | 0.78 mM | 18 mg (26%)       | 3 d  | 26 mg (37%)           |
|                          | 250 mg             | CH <sub>2</sub> Cl <sub>2</sub> | 1.44 mM | 33 mg (14%)       | 3 d  | 170 mg (68%)          |
|                          | 105 mg             | CH <sub>2</sub> Cl <sub>2</sub> | 2.33 mM | 9.5 mg (9%)       | 3 d  | 53 mg (50%)           |
|                          | 100 mg             | AcOEt                           | 1.35 mM | 28 mg (28%)       | 3 d  | 52 mg (52%)           |
| <b>1[7]</b>              | 130 mg             | CH <sub>2</sub> Cl <sub>2</sub> | 1.30 mM | 40 mg (31%)       | 3 d  | 59 mg (45%)           |
|                          | 100 mg             | AcOEt                           | 1.35 mM | 50 mg (50%)       | 3 d  | 45 mg (45%)           |

<sup>a</sup> Ref.<sup>2</sup> <sup>b</sup> Ref.<sup>3</sup>

**Helicene 1[5].** Following the general procedure, radical **1[5]** (57 mg, 22% yield in CH<sub>2</sub>Cl<sub>2</sub>) was obtained as a black solid starting from 260 mg (0.652 mmol) of **3[5]**. Mp 261–262 °C (toluene). IR  $\nu$  3053, 1594, 1484, 1385, 1300, 1130, 834, 777, 690 cm<sup>-1</sup>. UV-vis (CH<sub>2</sub>Cl<sub>2</sub>)  $\lambda_{\max}$  ( $\log \epsilon$ ) 261 (4.70), 287 (4.49), 300.5 (4.47), 367 (3.94), 386.5 (4.20), 423 (3.93), 547 (3.77), 640 (3.465), 709 (3.55) nm. ESI(+)-TOF  $m/z$  422 (30, [M + Na]<sup>+</sup>), 399 (80, [M + H]<sup>+</sup>); HRMS (ESI(+)-TOF)  $m/z$  [M + H]<sup>+</sup> calcd for C<sub>27</sub>H<sub>17</sub>N<sub>3</sub>O 399.1372, found 399.1359. Anal. Calcd for C<sub>27</sub>H<sub>16</sub>N<sub>3</sub>O: C, 81.39; H, 4.05; N, 10.55. Found: C, 81.43; H, 4.15; N, 10.62.

**Helicene 1[6].** Following the general procedure, radical **1[6]** (33 mg, 14% yield in CH<sub>2</sub>Cl<sub>2</sub>) was obtained as a black solid starting from 250 mg (0.557 mmol) of **3[6]**. Mp 121–123 °C (toluene). IR  $\nu$  3046, 1587, 1495, 1350, 1264, 1171, 835, 784, 687 cm<sup>-1</sup>. UV-vis (CH<sub>2</sub>Cl<sub>2</sub>)  $\lambda_{\max}$  ( $\log \epsilon$ ) 284 (4.67), 398 (3.86), 465 (3.38), 565 (3.53), 656.5 (3.21), 727.5 (3.29) nm. ESI(+)-TOF  $m/z$  449 (100, [M+H]<sup>+</sup>); HRMS (ESI(+)-TOF)  $m/z$  [M+H]<sup>+</sup> calcd for C<sub>31</sub>H<sub>19</sub>N<sub>3</sub>O 449.1528, found 449.1512. Anal. Calcd for C<sub>31</sub>H<sub>18</sub>N<sub>3</sub>O: C, 83.02; H, 4.05; N, 9.37. Found: C, 82.84; H, 3.88; N, 9.32.

**Helicene 1[7].** Following the general procedure, radical **1[7]** (50 mg, 50% yield in CH<sub>2</sub>Cl<sub>2</sub>) was obtained as a black solid starting from 100 mg (0.2 mmol) of **3[7]**. Mp 255–257 °C (toluene). IR  $\nu$  3041, 1584, 1481, 1346, 1262, 1150, 841, 776, 689 cm<sup>-1</sup>. UV-vis (CH<sub>2</sub>Cl<sub>2</sub>)  $\lambda_{\max}$  ( $\log \epsilon$ ) 265 (4.60), 308.5 (4.57), 395 (3.65), 434 (3.65), 451 (3.62), 482 (3.51), 534 (3.55), 570 (3.66), 659 (3.32), 731 (3.41) nm. ESI(+)-TOF  $m/z$  499 (100, [M + H]<sup>+</sup>); HRMS (ESI(+)-TOF)  $m/z$  [M + H]<sup>+</sup> calcd for C<sub>35</sub>H<sub>21</sub>N<sub>3</sub>O 499.1685, found 499.1673. Anal. Calcd for C<sub>35</sub>H<sub>20</sub>N<sub>3</sub>O: C, 84.32; H, 4.04; N, 8.43. Found: C, 84.09; H, 4.12; N, 8.34.

**Preparation of precursors 3[n].** General procedure.<sup>3</sup> To a stirred solution of the appropriate phenol **5[n]** (1.1 mmol) in DMSO (4 mL) 60% NaH (2.2 mmol) was added in one portion. After 15 min 8-fluoro-3-phenylbenzo[*e*][1,2,4]triazine<sup>4</sup> (**4**, 1.0 mmol) was added and the reaction mixture was stirred overnight under Ar atmosphere at 100 °C. After cooling, the mixture was diluted with AcOEt (30 mL) and organic layer was washed with water (3×25 mL) and brine (25 mL). The combined organic layer was dried (Na<sub>2</sub>SO<sub>4</sub>) and the solvent was evaporated. The solid residue was absorbed onto SiO<sub>2</sub> and separated by column chromatography (SiO<sub>2</sub>, petroleum ether/AcOEt, 2:1) giving **3[n]** as a yellow solid.

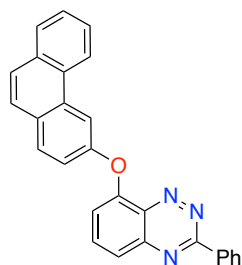

**8-(Phenanthren-3-yloxy)-3-phenylbenzo[*e*][1,2,4]triazine (3[5]).**

Following the general procedure, **3[5]** (606 mg, 96%) was obtained starting from 338 mg (1.74 mmol) of phenanthren-3-ol<sup>5</sup> (**5[5]**) and 356 mg (1.58 mmol) of 8-fluoro-3-phenylbenzo[*e*][1,2,4]triazine (**4**).<sup>4</sup> Mp 180-182 °C (pet. ether/AcOEt, 2:1); <sup>1</sup>H NMR (500 MHz, CDCl<sub>3</sub>)  $\delta$  8.82-8.80 (m, 2H), 8.55-8.52 (m, 2H), 8.00 (d,  $J$  = 8.6 Hz, 1H), 7.93-7.91 (m, 1H), 7.83-7.80 (m, 2H), 7.78 (d,  $J$  = 4.0 Hz, 2H), 7.65-7.61 (m, 5H), 7.53 (dd,  $J_1$  = 8.6 Hz,  $J_2$  = 2.3 Hz, 1H), 7.10 (dd,  $J_1$  = 6.4 Hz,  $J_2$  = 2.5 Hz, 1H); <sup>13</sup>C NMR (125 MHz, CDCl<sub>3</sub>)  $\delta$  160.3, 155.5, 154.4, 142.3, 140.2, 136.0, 135.6, 132.4, 132.1, 131.8, 130.9, 129.9, 129.6, 129.11, 129.05, 128.8, 127.3, 126.83, 128.80, 126.5, 123.0, 122.8, 120.3, 114.2, 113.8. ESI(+)-TOF  $m/z$  400 (100, [M+H]<sup>+</sup>); HRMS (ESI(+)-TOF)  $m/z$  [M+H]<sup>+</sup> calcd for C<sub>27</sub>H<sub>18</sub>N<sub>3</sub>O 400.1450, found 400.1446. Anal. Calcd for C<sub>27</sub>H<sub>17</sub>N<sub>3</sub>O: C, 81.19; H, 4.29; N, 10.52. Found: C, 81.20; H, 4.24; N, 10.50.

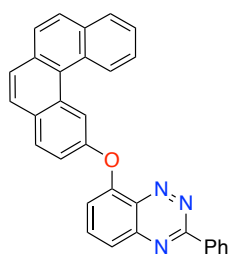

**8-(Benzo[c]phenanthren-2-yloxy)-3-phenylbenzo[e][1,2,4]-triazine (3[6]).**

Following the general procedure, **3[6]** (596 mg, 64%) was obtained starting from 556 mg (2.28 mmol) of benzo[c]phenanthren-2-ol<sup>6</sup> (**5[6]**) and 466 mg (2.07 mmol) of 8-fluoro-3-phenylbenzo[e][1,2,4]triazine (**4**).<sup>4</sup> Mp 224-225 °C (pet. ether/AcOEt, 4:1); <sup>1</sup>H NMR (400 MHz, CDCl<sub>3</sub>) δ 8.98-8.95 (m, 2H), 8.83-8.80 (m, 2H), 8.14 (d, *J* = 8.7 Hz, 1H), 8.00-7.98 (m, 1H), 7.96 (d, *J* = 8.5 Hz, 1H), 7.92 (d, *J* = 8.6 Hz, 1H), 7.86 (d, *J* = 4.8 Hz, 1H), 7.85 (d, *J* = 4.8 Hz, 1H), 7.80 (d, *J* = 4.4 Hz, 2H), 7.64-7.55 (m, 6H), 7.02 (t, *J* = 4.5 Hz, 1H); <sup>13</sup>C NMR (100 MHz, CDCl<sub>3</sub>) δ 160.3, 155.4, 154.2, 142.3, 140.1, 135.9, 135.5, 133.4, 131.7, 131.52, 131.48, 131.0, 130.8, 130.2, 129.02, 128.95, 128.6, 128.3, 128.1, 127.3, 127.1, 126.82, 126.78, 126.7, 126.5, 126.1, 122.7, 119.6, 118.4, 114.2. ESI(+)-TOF *m/z* 450 (100, [M+H]<sup>+</sup>); HRMS (ESI(+)-TOF) *m/z* [M+H]<sup>+</sup> calcd for C<sub>31</sub>H<sub>20</sub>N<sub>3</sub>O: 450.1606, found: 450.1601. Anal. Calcd for C<sub>31</sub>H<sub>19</sub>N<sub>3</sub>O: C, 82.83; H, 4.26; N, 9.35. Found: C, 82.79; H, 4.28; N, 9.36.

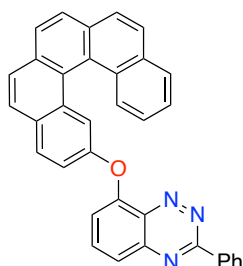

**8-(Dibenzo[c,g]phenanthren-9-yloxy)-3-phenylbenzo[e][1,2,4]-triazine (3[7]).**

Following the general procedure, **3[7]** (200 mg, 60%) was obtained starting from 215 mg (0.73 mmol) of dibenzo[c,g]phenanthren-9-ol (**5[7]**)<sup>7</sup> and 150 mg (0.67 mmol) of 8-fluoro-3-phenylbenzo[e][1,2,4]triazine (**4**).<sup>4</sup> Mp 221-223 °C (pet ether/CH<sub>2</sub>Cl<sub>2</sub>, 2:3); <sup>1</sup>H NMR (400 MHz, CDCl<sub>3</sub>) δ 8.79-8.77 (m, 2H), 8.44 (d, *J* = 8.4 Hz, 1H), 8.10 (s, 1H), 8.06 (d, *J* = 8.4 Hz, 1H), 7.96 (d, *J* = 8.4 Hz, 1H), 7.87 (d, *J* = 8.4 Hz, 3H), 7.79 (s, 2H), 7.76-7.67 (m, 3H), 7.62-7.59 (m, 3H), 7.55-7.52 (m, 1H), 7.23 (t, *J* = 7.6 Hz, 1H), 7.05 (d, *J* = 7.2 Hz, 1H), 6.94 (t, *J* = 6.8 Hz, 1H); <sup>13</sup>C NMR (100 MHz, CDCl<sub>3</sub>) δ 160.1, 154.3, 154.0, 142.2, 140.4, 135.65, 135.61, 132.8, 132.6, 132.24, 132.19, 131.8, 130.4, 130.2, 129.9, 129.12, 128.99, 128.7, 127.8, 127.72, 127.68, 127.3, 127.2, 127.0, 126.6, 126.25, 126.20, 125.9, 124.4, 123.5, 120.1, 117.4, 116.9. ESI(+)-TOF *m/z* 500 (100, [M + H]<sup>+</sup>); HRMS (ESI(+)-TOF) *m/z* [M + H]<sup>+</sup> calcd for C<sub>35</sub>H<sub>22</sub>N<sub>3</sub>O 500.1763, found 500.1754. Anal. Calcd for C<sub>35</sub>H<sub>21</sub>N<sub>3</sub>O: C, 84.15; H, 4.24; N, 8.41. Found: C, 84.19; H, 4.28; N, 8.43.

**Preparation of phenols 5[n]. General procedure.** To a solution of the appropriate methoxyarene (~ 3.5 mmol) in dry CH<sub>2</sub>Cl<sub>2</sub> (50 mL) at 0 °C was added dropwise a solution of BBr<sub>3</sub> in CH<sub>2</sub>Cl<sub>2</sub> (1.0 M). The resulting mixture was stirred overnight, allowing the solution to warm to room temperature. The solution was then cooled to 0 °C, the reaction was quenched

with water (20 mL) and the solvent was removed under reduced pressure. The aqueous suspension was extracted with AcOEt (3 x 20 mL), the collected organic layers were washed with brine and dried (Na<sub>2</sub>SO<sub>4</sub>). After evaporation of solvent the residue was purified by column chromatography (SiO<sub>2</sub>, pet. ether/AcOEt, 1:1) giving appropriate phenol **5[n]**.

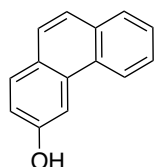

**Phenanthren-3-ol (5[5]).**<sup>5</sup> Following the general procedure, **5[5]** (630 mg, 96% yield) was obtained starting from 704 mg (3.38 mmol) of 3-methoxyphenanthrene (**S3**). Mp 117-119 °C (MeOH). <sup>1</sup>H NMR (400 MHz, CDCl<sub>3</sub>) δ 8.54 (d, *J* = 8.1 Hz, 1H), 8.04 (d, *J* = 2.4 Hz, 1H), 7.87 (dd, *J*<sub>1</sub> = 7.1 Hz, *J*<sub>2</sub> = 2.1 Hz, 1H), 7.80 (d, *J* = 8.6 Hz, 1H), 7.67 (d, *J* = 8.8 Hz, 1H), 7.64-7.57 (m, 3H), 7.17 (dd, *J*<sub>1</sub> = 8.6 Hz, *J*<sub>2</sub> = 2.5 Hz, 1H), 5.09 (bs, 1H); <sup>13</sup>C NMR (100 MHz, CDCl<sub>3</sub>) δ 154.4, 132.5, 132.0, 130.4, 129.6, 128.7, 126.9, 126.7, 126.3, 124.7, 122.9, 116.8, 107.0. ESI(-)-TOF *m/z* 193 (100, [M-H]<sup>-</sup>); HRMS (ESI(-)-TOF) *m/z* [M-H]<sup>-</sup> calcd for C<sub>14</sub>H<sub>9</sub>O 193.0653, found 193.0658. Anal. Calcd for C<sub>14</sub>H<sub>10</sub>O: C, 86.57; H, 5.19. Found: C, 86.29; H, 5.22.

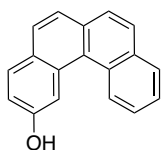

**Benzo[c]phenanthrene-2-ol (5[6]).**<sup>6</sup> Following the general procedure, **5[6]** (899 mg, 97%) was obtained starting from 980 mg (3.8 mmol) of 2-methoxybenzo[c]phenanthrene (**N5**). Mp 108-109 °C (EtOH; lit.<sup>6</sup> 112-115 °C). <sup>1</sup>H NMR (400 MHz, CDCl<sub>3</sub>) δ 9.13 (d, *J* = 8.4 Hz, 1H), 8.56 (d, *J* = 1.9 Hz, 1H), 8.01 (d, *J* = 7.9 Hz, 1H), 7.94 (d, *J* = 8.6 Hz, 1H), 7.89 (d, *J* = 8.9 Hz, 1H), 7.84 (d, *J* = 8.5 Hz, 1H), 7.80 (d, *J* = 8.5 Hz, 1H), 7.70 (d, *J* = 8.5 Hz, 1H), 7.68 (td, *J*<sub>1</sub> = 8.5 Hz, *J*<sub>2</sub> = 1.5 Hz, 1H), 7.61 (td, *J*<sub>1</sub> = 7.9 Hz, *J*<sub>2</sub> = 1.1 Hz, 1H), 7.23 (dd, *J*<sub>1</sub> = 8.6 Hz, *J*<sub>2</sub> = 2.4 Hz, 1H), 5.05 (bs, 1H); <sup>13</sup>C NMR (100 MHz, CDCl<sub>3</sub>) δ 154.3, 133.4, 131.8, 131.7, 130.6, 130.5, 128.8, 127.8, 127.4, 127.1, 126.4, 126.3, 125.8, 124.8, 116.4, 111.7. ESI(-)-TOF *m/z* 243 (100, [M-H]<sup>-</sup>); HRMS (ESI(-)-TOF) *m/z* [M-H]<sup>-</sup> calcd for C<sub>18</sub>H<sub>11</sub>O 243.0810, found 243.0818. Anal. Calcd for C<sub>18</sub>H<sub>12</sub>O: C, 88.50; H, 4.95. Found: C, 88.45; H, 4.98.

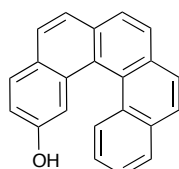

**Dibenzo[c,g]phenanthrene-9-ol (5[7]).**<sup>7</sup> Following the general procedure, **5[7]** (615 mg, 95%) was obtained starting from 678 mg (2.2 mmol) of 9-methoxydibenzo[c,g]phenanthrene (**M4**). Mp 188-190 °C (pet ether/EtOAc, 9:1; lit.<sup>7</sup> 188-191 °C). <sup>1</sup>H NMR (400 MHz, CDCl<sub>3</sub>) δ 8.56 (d, *J* = 8.8 Hz, 1H), 7.96-7.85 (m, 8H), 7.76 (d, *J* = 8.4 Hz, 1H), 7.53 (t, *J* = 7.2 Hz, 1H), 7.33 (t, *J* = 8.4 Hz, 1H), 7.15 (dd, *J*<sub>1</sub> = 8.4 Hz, *J*<sub>2</sub> = 2.0 Hz, 1H), 4.86 (bs, 1H); <sup>13</sup>C NMR (100 MHz, CDCl<sub>3</sub>) δ 152.7, 132.9, 132.8, 132.26, 132.21, 130.4, 129.9, 129.4, 128.1, 127.8, 127.49, 127.45, 127.41, 127.3,

126.6, 126.4, 126.1, 124.4, 124.3, 117.0, 112.6. ESI(-)-TOF  $m/z$  293 (100,  $[M-H]^-$ ); HRMS (ESI(-)-TOF)  $m/z$   $[M-H]^-$  calcd for  $C_{22}H_{13}O$  293.0966, found 293.0974. Anal. Calcd for  $C_{22}H_{14}O$ : C, 89.77; H, 4.79. Found: C, 89.71; H, 4.75.

• **Synthesis of methoxyarenes precursors to phenols 5[n]**

**Precursor to phenol 5[5]**

a) **3-Methoxyphenanthrene (S3)** was synthesized according to a literature procedure,<sup>5</sup> shown in the Scheme S1.

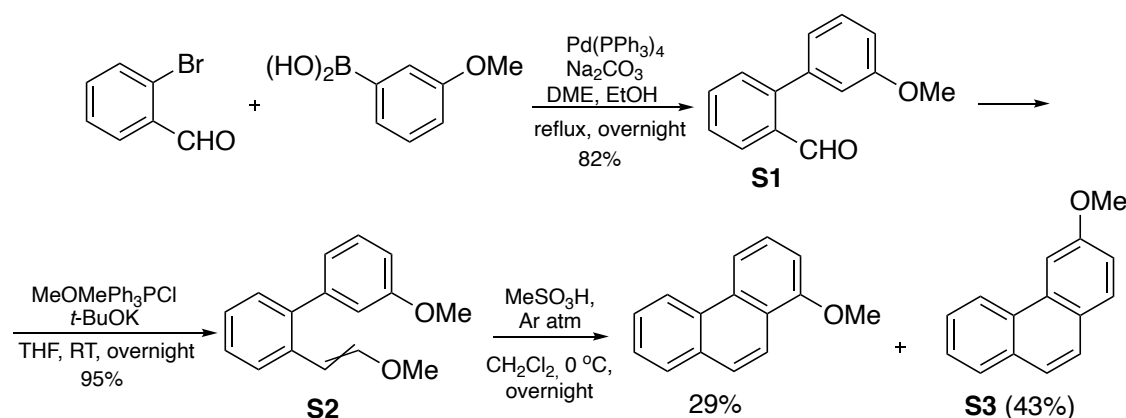

**Scheme S1.** Synthesis of 3-methoxyphenanthrene (**S3**).

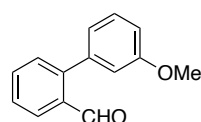

**3'-Methoxybiphenyl-2-carboxyaldehyde (S1).**<sup>5</sup> Following a literature procedure,<sup>5</sup> to a solution of 2-bromobenzaldehyde (4.08 g, 22.1 mmol) in dry dimethoxymethane (60 mL) under Ar was added  $Pd(PPh_3)_4$  (0.504 g, 0.44 mmol). The resulting solution was stirred at room temperature, then a solution of 3-methoxyphenylboronic acid (4.02 g, 26.4 mmol) in EtOH (40 mL) was added. After 20 min, a solution of  $Na_2CO_3$  (7.0 g, 66.0 mmol) in  $H_2O$  (30 mL) was added and the mixture was refluxed overnight. The solution was cooled and concentrated under reduced pressure. The residue was extracted with  $CH_2Cl_2$  (3 x 50 mL), then combined organic layers were washed with  $H_2O$  (50 mL), brine (50 mL) and dried ( $Na_2SO_4$ ). After evaporation of the solvent the residue was purified by column chromatography ( $SiO_2$ , pet. ether/AcOEt, 10:1) giving 3.97 g (82% yield) of product as a colorless oil:  $^1H$  NMR (500 MHz,  $CDCl_3$ )  $\delta$  10.0 (s, 1H), 8.02 (dd,  $J_1 = 7.8$  Hz,  $J_2 = 1.0$  Hz, 1H), 7.64 (td,  $J_1 = 7.6$  Hz,  $J_2 = 1.4$  Hz, 1H), 7.50 (t,  $J = 7.6$  Hz, 1H), 7.45 (d,  $J = 7.6$  Hz, 1H), 7.38 (t,  $J = 7.9$  Hz, 1H), 6.99 (dd,  $J_1 = 8.4$  Hz,  $J_2 = 2.0$  Hz, 1H), 6.95 (d,  $J = 7.5$  Hz, 1H), 6.92 (t,  $J = 2.0$  Hz, 1H), 3.85 (s, 3H);  $^{13}C$  NMR (125 MHz,  $CDCl_3$ )  $\delta$  192.6, 159.6, 146.0, 139.3, 133.9, 133.7, 130.7, 129.6, 128.0, 127.6, 122.9, 115.8, 113.8, 55.5; HRMS (TOF-AP<sup>+</sup>)  $m/z$  (100,  $[M]^+$ ) calcd for  $C_{14}H_{12}O_2$  212.0837, found 212.0836.

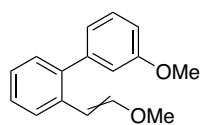

**3'-Methoxy-2-(2-methoxyvinyl)biphenyl (S2).**<sup>5</sup> Following a literature procedure,<sup>5</sup> to a solution of methyltriphenylphosphonium chloride (5.2 g, 15.15 mmol) in dry THF (50 mL) under Ar was added dropwise 1M solution of *t*-BuOK in dry THF (15.2 mL, 15.15 mmol) at room temperature for 1h. Then, the solution of 3'-methoxybiphenyl-2-carboxyaldehyde (S1, 1.34 g, 6.06 mmol) in dry THF (50 mL) was added dropwise and resulting mixture was stirred overnight. The solvent was evaporated to dryness and the crude product was purified by column chromatography (SiO<sub>2</sub>, pet. ether/AcOEt, 0-10%) giving 1.39 g (95% yield) of (S2) as a mixture of the *E*- and *Z*-isomers (5:4 *E/Z*) as a yellowish oil; *E*-isomer: <sup>1</sup>H NMR (500 MHz, CDCl<sub>3</sub>) δ 7.41 (d, *J* = 7.6 Hz, 1H), 7.20-7.33 (m, 4H), 6.88-6.98 (m, 4H), 5.80 (d, *J* = 12.9 Hz, 1H), 3.83 (s, 3H), 3.55 (s, 3H); <sup>13</sup>C NMR (125 MHz, CDCl<sub>3</sub>) δ 159.4, 148.0, 143.3, 139.9, 134.2, 130.2, 129.1, 127.7, 126.0, 125.0, 122.4, 115.3, 112.7, 104.5, 56.6, 55.4; *Z*-isomer: <sup>1</sup>H NMR (500 MHz, CDCl<sub>3</sub>) δ 8.11 (d, *J* = 7.9 Hz, 1H), 7.20-7.33 (m, 4H), 6.88-6.98 (m, 3H), 6.07 (d, *J* = 7.2 Hz, 1H), 5.20 (d, *J* = 7.2 Hz, 1H), 3.83 (s, 3H), 3.75 (s, 3H); <sup>13</sup>C NMR (125 MHz, CDCl<sub>3</sub>) δ 159.3, 149.0, 143.0, 140.3, 133.3, 129.7, 129.3, 129.1, 127.4, 125.7, 122.3, 115.4, 112.6, 103.8, 60.7, 55.4; HRMS (TOF-AP<sup>+</sup>) *m/z* (100, [M]<sup>+</sup>) calcd for C<sub>16</sub>H<sub>16</sub>O<sub>2</sub>: 240.1150, found: 240.1145.

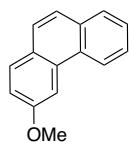

**3-Methoxyphenanthrene (S3).** Following a literature procedure,<sup>5</sup> to a solution of 3'-methoxy-2-(2-methoxyvinyl)biphenyl (S2, 1.98 g, 8.25 mmol) in CH<sub>2</sub>Cl<sub>2</sub> (100 mL) was added MeSO<sub>3</sub>H (0.45 mL) under Ar at 0 °C. The resulting solution was stirred until TLC showed absence of starting material. Then, a saturated solution of NaHCO<sub>3</sub> (30 mL) was added and stirring was continued for 15 min. Layers were separated and the water phase was washed with CH<sub>2</sub>Cl<sub>2</sub> (2 × 30 mL). Combined organic layers were dried (Na<sub>2</sub>SO<sub>4</sub>), solvent was evaporated and the residue was separated by column chromatography (pet. ether/CH<sub>2</sub>Cl<sub>2</sub>, 0-20 %) giving 1-methoxyphenanthrene (507 mg, 29% yield) as a first fraction and desired 3-methoxyphenanthrene (738 mg, 43% yield) as a second fraction. Analytically pure 3-methoxyphenanthrene (S3) was obtained by recrystallization from MeOH. Mp 55-56 °C (MeOH). <sup>1</sup>H NMR (500 MHz, CDCl<sub>3</sub>) δ 8.62 (d, *J* = 8.2 Hz, 1H), 8.07 (d, *J* = 2.3 Hz, 1H), 7.90 (d, *J* = 7.9 Hz, 1H), 7.82 (d, *J* = 8.7 Hz, 1H), 7.70 (d, *J* = 8.7 Hz, 1H), 7.66-7.58 (m, 3H), 7.27 (dd, *J*<sub>1</sub> = 8.5 Hz, *J*<sub>2</sub> = 2.4 Hz, 1H), 4.03 (s, 3H); <sup>13</sup>C NMR (125 MHz, CDCl<sub>3</sub>) δ 158.6, 132.5, 131.7, 130.1, 129.9, 128.7, 126.8, 126.75, 126.70, 126.2, 124.7, 122.8, 116.8, 104.1, 55.6. Anal. Calcd for C<sub>15</sub>H<sub>12</sub>O: C, 86.51; H, 5.81. Found: C, 86.48; H, 5.72.



### Precursor to phenol 5[6]

b) 2-Methoxybenzo[*c*]phenanthrene (**N5**) was synthesized according to a modified literature procedure,<sup>6</sup> as shown in Scheme S2.

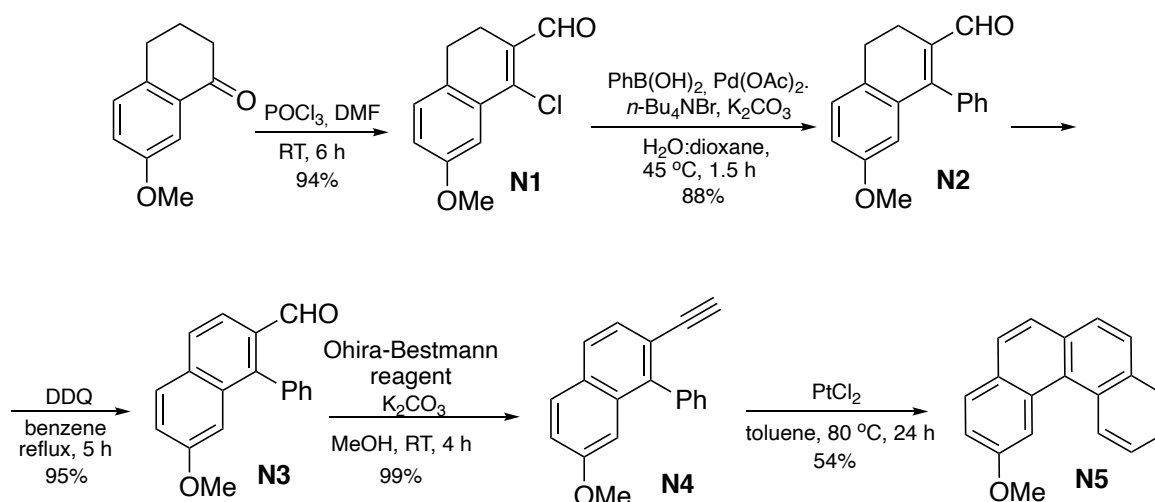

**Scheme S2.** Synthesis of 2-Methoxybenzo[*c*]phenanthrene (**N5**).

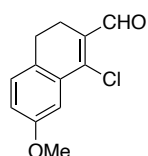

#### 1-Chloro-7-methoxy-3,4-dihydronaphthalene-2-carbaldehyde (**N1**).<sup>6</sup>

Following a literature procedure,<sup>6</sup>  $\text{POCl}_3$  (4.52 mL, 48 mmol) was added dropwise to DMF (4.65 mL, 60.0 mmol) at  $0^\circ\text{C}$ . The mixture was warmed to room temperature and stirred for 15 min, next cooled to  $0^\circ\text{C}$  and then 7-methoxy-1-tetralone (5.45 g, 30.0 mmol) in dry DMF (15 mL) was added dropwise. The mixture was again warmed to room temperature and stirred overnight. The reaction mixture was poured into ice, quenched with sat.  $\text{NaHSO}_3$ , then extracted with  $\text{Et}_2\text{O}$  ( $3 \times 50$  mL) and washed with  $\text{H}_2\text{O}$ , and brine. The combined organic layer was dried ( $\text{Na}_2\text{SO}_4$ ), filtered and solvent was evaporated. The residue was purified by column chromatography ( $\text{SiO}_2$ , pet. ether/ $\text{AcOEt}$ , 10:1) giving 6.52 g (94% yield) of product **N1** as a yellow solid. Mp  $54\text{--}55^\circ\text{C}$  ( $\text{EtOH}$ );  $^1\text{H NMR}$  (500 MHz,  $\text{CDCl}_3$ )  $\delta$  10.38 (s, 1H), 7.40 (d,  $J = 2.6$  Hz, 1H), 7.13 (d,  $J = 8.3$  Hz, 1H), 6.91 (dd,  $J_1 = 8.2$  Hz,  $J_2 = 2.6$  Hz, 1H), 3.85 (s, 3H), 2.77 (t,  $J = 7.5$  Hz, 2H), 2.61 (t,  $J = 7.5$  Hz, 2H);  $^{13}\text{C NMR}$  (125 MHz,  $\text{CDCl}_3$ )  $\delta$  190.8, 158.7, 145.9, 133.0, 132.5, 131.2, 128.7, 117.0, 111.9, 55.6, 26.2, 22.1; MS (TOF-AP<sup>+</sup>)  $m/z$  223 (100,  $[\text{M}+1]^+$ ); HRMS (ESI(+)-TOF)  $m/z$   $[\text{M}+1]^+$  calcd for  $\text{C}_{12}\text{H}_{12}\text{O}_2\text{Cl}$  223.0526, found 223.0522. Anal. Calcd for  $\text{C}_{12}\text{H}_{11}\text{O}_2\text{Cl}$ : C, 64.73; H, 4.98. Found: C, 64.51; H, 5.09.

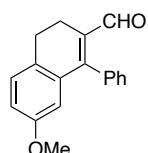

#### 7-Methoxy-1-phenyl-3,4-dihydronaphthalene-2-carbaldehyde (**N2**).<sup>6</sup>

Following a literature procedure,<sup>6</sup> a suspension of aldehyde **N1** (3.33 g, 14.9 mmol), phenylboronic acid (2.0 g, 16.4 mmol),  $n\text{-Bu}_4\text{NBr}$  (9.6 g, 29.8 mmol),

Pd(OAc)<sub>2</sub> (67 mg, 0.298 mmol), and K<sub>2</sub>CO<sub>3</sub> (5.14 g, 37.3 mmol) in degassed mixture of H<sub>2</sub>O (30 mL) and 1,4-dioxane (10 mL) was stirred at 45 °C for 1.5 h. The reaction mixture was cooled to room temperature, diluted with H<sub>2</sub>O (20 mL) and then extracted with AcOEt (3x100 mL). The combined organic layer was dried (Na<sub>2</sub>SO<sub>4</sub>) and filtered. After evaporation of solvent the residue was purified on column chromatography (SiO<sub>2</sub>, pet. ether/AcOEt, gradient 0-10%) giving 3.46 g (88% yield) of aldehyde **N2** as a yellow solid. Mp 76-78 °C (EtOH; lit.<sup>6</sup> 71-73 °C); <sup>1</sup>H NMR (500 MHz, CDCl<sub>3</sub>) δ 9.57 (s, 1H), 7.46-7.44 (m, 3H), 7.29-7.27 (m, 2H), 7.18 (d, *J* = 8.2 Hz, 1H), 6.85 (dd, *J*<sub>1</sub> = 8.2 Hz, *J*<sub>2</sub> = 2.7 Hz, 1H), 6.43 (d, *J* = 2.6 Hz, 1H), 3.65 (s, 3H), 2.85 (t, *J* = 8.5 Hz, 2H), 2.68 (t, *J* = 8.5 Hz, 2H); <sup>13</sup>C NMR (125 MHz, CDCl<sub>3</sub>) δ 193.6, 158.3, 154.5, 136.3, 135.2, 134.9, 130.9, 130.6, 128.65, 128.63, 128.4, 114.94, 114.89, 55.4, 26.8, 20.8; MS (TOF-AP<sup>+</sup>) *m/z* 265 (100, [M+1]<sup>+</sup>); HRMS (TOF-AP<sup>+</sup>) *m/z* [M+1]<sup>+</sup> calcd for C<sub>18</sub>H<sub>17</sub>O<sub>2</sub> 265.1229, found 265.1225. Anal. Calcd for C<sub>18</sub>H<sub>16</sub>O<sub>2</sub>: C, 81.79; H, 6.10. Found: C, 81.92; H, 6.25.

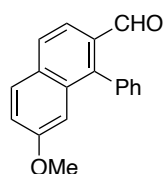

**7-Methoxy-1-phenyl-2-naphthaldehyde (N3).**<sup>6</sup> Following a literature procedure,<sup>6</sup> a suspension of aldehyde **N2** (2.60 g, 9.85 mmol) and DDQ (3.00 g, 12.8 mmol) in benzene (50 mL) was stirred at 80 °C for 5 h. The mixture was cooled to room temperature, filtered through a short pad of Celite and then

solvent was evaporated. The residue was washed with 1M NaOH and the aqueous layer was extracted with toluene. The combined organic layer was dried (Na<sub>2</sub>SO<sub>4</sub>), filtered and solvent was evaporated. The crude product was purified by column chromatography (SiO<sub>2</sub>, pet. ether/AcOEt, 10:1) giving 2.46 g (95% yield) of aldehyde **N3** as a yellow solid. Mp 70-72 °C (EtOH, lit.<sup>6</sup> 71-73 °C). <sup>1</sup>H NMR (500 MHz, CDCl<sub>3</sub>) δ 9.87 (s, 1H), 7.93 (d, *J* = 8.5 Hz, 1H), 7.87 (d, *J* = 8.6 Hz, 1H), 7.84 (d, *J* = 8.9 Hz, 1H), 7.56-7.52 (m, 3H), 7.42-7.41 (m, 2H), 7.28 (dd, *J*<sub>1</sub> = 8.9 Hz, *J*<sub>2</sub> = 2.5 Hz, 1H), 6.33 (d, *J* = 2.5 Hz, 1H), 3.70 (s, 3H); <sup>13</sup>C NMR (125 MHz, CDCl<sub>3</sub>) δ 193.2, 158.4, 145.3, 135.6, 133.9, 131.7, 131.1, 129.8, 128.5, 128.2, 121.2, 120.2, 106.3, 55.3; MS (TOF-AP<sup>+</sup>) *m/z* 263 (100, [M+1]<sup>+</sup>); HRMS (TOF-AP<sup>+</sup>) *m/z* [M+H]<sup>+</sup> calcd for C<sub>18</sub>H<sub>15</sub>O<sub>2</sub> 263.1072, found 263.1060. Anal. Calcd for C<sub>18</sub>H<sub>14</sub>O<sub>2</sub>: C, 82.42; H, 5.38. Found: C, 82.41; H, 5.36.

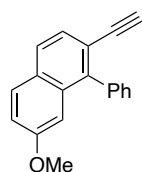

**2-Ethynyl-7-methoxy-1-phenylnaphthalene (N4).**<sup>6</sup> Following a adopted literature procedure,<sup>8</sup> a dried flask equipped with a magnetic stirring bar was loaded with the aldehyde **N3** (1.08 g, 4.12 mmol), pre-dried K<sub>2</sub>CO<sub>3</sub> (1.70g, 12.4 mmol) and dissolved in dry methanol (40 mL). Then, the Ohira–Bestmann reagent

(2.37 g, 12.4 mmol) was added and the mixture stirred at room temperature for 4 h. The reaction mixture was next diluted with Et<sub>2</sub>O, washed with aq. NaHCO<sub>3</sub> solution, dried (Na<sub>2</sub>SO<sub>4</sub>). After evaporation of solvent, the residue was passed through short column chromatography (SiO<sub>2</sub>, pet. ether/AcOEt, 3:1) giving 1.05 g (99% yield) of alkyne **N4** as an oil. <sup>1</sup>H NMR (500 MHz, CDCl<sub>3</sub>) δ 7.77 (d, *J* = 8.9 Hz, 1H), 7.74 (d, *J* = 8.4 Hz, 1H), 7.53-7.50 (m, 3 H), 7.47-7.43 (m, 3H), 7.17 (dd, *J*<sub>1</sub> = 8.9 Hz, *J*<sub>2</sub> = 2.5 Hz, 1H), 6.87 (d, *J* = 2.4 Hz, 1H), 3.69 (s, 3H), 2.99 (s, 1H); <sup>13</sup>C NMR (125 MHz, CDCl<sub>3</sub>) δ 158.2, 142.5, 138.9, 133.4, 130.4, 129.6, 129.0, 128.3, 127.7, 127.3, 127.0, 119.4, 119.1, 105.4, 83.8, 80.7, 55.3; MS (TOF-AP<sup>+</sup>) *m/z* 258 [100, M<sup>+</sup>] HRMS (TOF-AP<sup>+</sup>) *m/z* [M]<sup>+</sup> calcd for C<sub>19</sub>H<sub>14</sub>O 258.1045, found 258.1037.

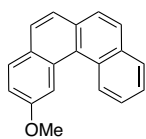

**2-Methoxybenzo[*c*]phenanthrene (N5).**<sup>6</sup> A solution of 2-ethenyl-7-methoxy-1-phenylnaphthalene (452 mg, 1.75 mmol) and PtCl<sub>2</sub> (46.6 mg, 0.175 mmol) in dry toluene (15 mL) was stirred at 80 °C for 24 h under N<sub>2</sub> atmosphere. Then, the reaction mixture was filtered through a short plug of silica gel (pet. ether/CH<sub>2</sub>Cl<sub>2</sub>, 2:1). The filtrate was concentrated under vacuum and the residue was purified by column chromatography (SiO<sub>2</sub>, pet. ether/AcOEt, 20:1) giving 245 mg (54% yield) of 2-methoxybenzo[*c*]phenanthrene (**N5**) as a white solid. Mp 68-70 °C (EtOH). <sup>1</sup>H NMR (400 MHz, CDCl<sub>3</sub>) δ 9.20 (d, *J* = 8.5 Hz, 1H), 8.60 (d, *J* = 2.4 Hz, 1H), 8.02 (dd, *J*<sub>1</sub> = 7.8 Hz, *J*<sub>2</sub> = 1.5 Hz, 1H), 7.95 (d, *J* = 8.8 Hz, 1H), 7.89 (d, *J* = 8.5 Hz, 1H), 7.85 (d, *J* = 8.4 Hz, 1H), 7.81 (d, *J* = 8.5 Hz, 1H), 7.71 (d, *J* = 8.5 Hz, 1H), 7.68-7.60 (m, 2H), 7.30 (dd, *J*<sub>1</sub> = 8.8 Hz, *J*<sub>2</sub> = 2.5 Hz, 1H), 4.03 (s, 3H); <sup>13</sup>C NMR (100 MHz, CDCl<sub>3</sub>) δ 158.3, 133.4, 131.6, 130.6, 130.0, 128.7, 128.5, 127.5, 127.2, 127.1, 127.0, 126.6, 126.0, 125.7, 124.6, 116.4, 109.1, 55.6; MS (ESI(+)-TOF) *m/z* 258 [100, M<sup>+</sup>] HRMS (ESI(+)-TOF) *m/z* [M]<sup>+</sup> calcd for C<sub>19</sub>H<sub>14</sub>O 258.1045, found 258.1045. Anal. Calcd for C<sub>19</sub>H<sub>14</sub>O: C, 88.34; H, 5.46. Found: C, 88.63; H, 5.07.

### ***Precursor to phenol 5[7]***

c) 9-Methoxydibenzo[*c,g*]phenanthrene (M4) was synthesized according to a modified literature procedure, as shown in Scheme S3.

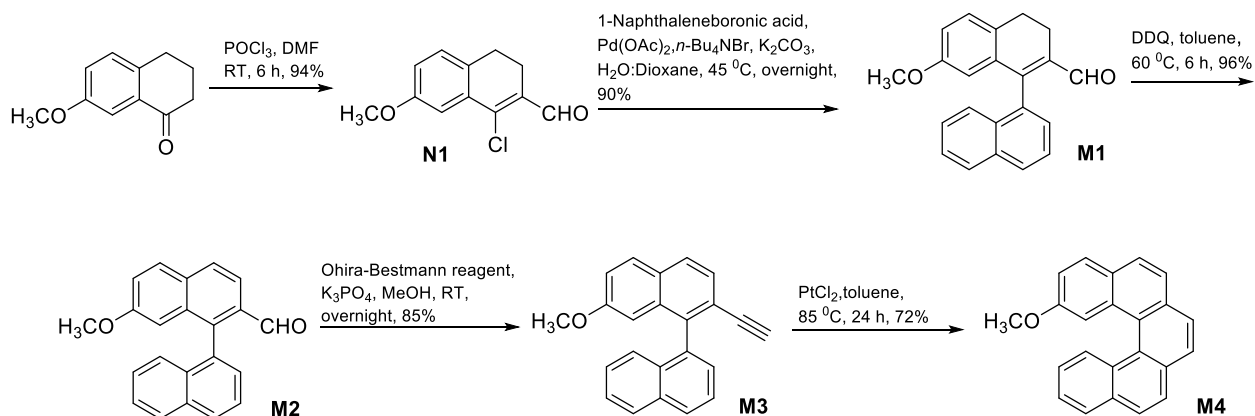

**Scheme S3.** 9-Methoxydibenzo[*c,g*]phenanthrene (**M4**).

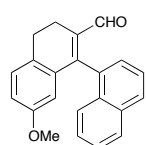

**7-Methoxy-3,4-dihydro-[1,1'-binaphthalene]-2-carbaldehyde (M1).**<sup>7</sup>

Following a literature procedure,<sup>7</sup> a suspension of aldehyde **N1** (690 mg, 3.1 mmol), 1-naphthaleneboronic acid (580 mg, 3.4 mmol), *n*-Bu<sub>4</sub>NBr (990 mg, 3.1 mmol), Pd(OAc)<sub>2</sub> (34 mg, 0.16 mmol), and K<sub>2</sub>CO<sub>3</sub> (850 mg, 6.2 mmol) in degassed mixture of H<sub>2</sub>O (6 mL) and 1,4-dioxane (2 mL) was stirred at 45 °C for overnight. The reaction mixture was cooled to room temperature, diluted with H<sub>2</sub>O (20 mL) and then extracted with AcOEt (3x10 mL). The combined organic layer was dried (Na<sub>2</sub>SO<sub>4</sub>) and filtered. After evaporation of solvent the residue was purified on column chromatography (SiO<sub>2</sub>, petroleum ether/AcOEt, gradient 0-6%) giving 877 mg (90%) of aldehyde **M1** as a pale yellow solid. Mp 104-106 °C (petroleum ether/AcOEt; lit.<sup>7</sup> 100-103 °C); <sup>1</sup>H NMR (400 MHz, CDCl<sub>3</sub>) δ 9.39 (s, 1H), 7.96 (dd, *J*<sub>1</sub> = 12.4 Hz, *J*<sub>2</sub> = 8.4 Hz, 2H), 7.59-7.47 (m, 3H), 7.43-7.37 (m, 2H), 7.24 (d, *J* = 8.4 Hz, 1H), 6.83 (dd, *J*<sub>1</sub> = 8.4 Hz, *J*<sub>2</sub> = 1.6 Hz, 1H), 6.22 (d, *J* = 2.4 Hz, 1H), 3.51 (s, 3H), 3.01-2.84 (m, 3H), 2.73-2.65 (m, 1H); <sup>13</sup>C NMR (100 MHz, CDCl<sub>3</sub>) δ 193.3, 158.4, 153.1, 136.4, 136.3, 133.6, 132.82, 132.72, 130.4, 129.1, 128.69, 128.54, 126.9, 126.5, 126.0, 125.2, 114.8, 114.6, 55.3, 26.9, 20.7; ESI(+)-TOF *m/z* 315 (100, [M + H]<sup>+</sup>); HRMS (ESI(+)-TOF) *m/z* [M + H]<sup>+</sup> calcd for C<sub>22</sub>H<sub>19</sub>O<sub>2</sub> 315.1385, found 315.1390. Anal. Calcd for C<sub>22</sub>H<sub>18</sub>O<sub>2</sub>: C, 84.05; H, 5.77. Found: C, 84.07; H, 5.78.

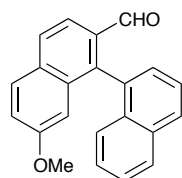

**7-Methoxy-[1,1'-binaphthalene]-2-carbaldehyde (M2).**<sup>7</sup> Following a literature procedure,<sup>7</sup> a suspension of aldehyde **M1** (810 mg, 2.58 mmol) and DDQ (725 mg, 3.19 mmol) in toluene (15 mL) was stirred at 60 °C for 6 h. The mixture was cooled to room temperature, filtered through a short pad of Celite.

The mixture was washed with 1M NaOH and the aqueous layer was extracted with toluene. The combined organic layer was dried (Na<sub>2</sub>SO<sub>4</sub>), filtered and solvent was evaporated. The

crude product was purified by column chromatography (SiO<sub>2</sub>, petroleum ether/AcOEt, 19:1) giving 774 mg (96% yield) of aldehyde **M2** as a white solid. Mp 72-75 °C (pet ether/AcOEt, lit.<sup>7</sup> 75-76 °C); <sup>1</sup>H NMR (400 MHz, CDCl<sub>3</sub>) δ 9.67 (s, 1H), 8.06-8.03 (m, 2H), 8.00 (t, *J* = 7.6 Hz, 2H), 7.91 (d, *J* = 9.2 Hz, 1H), 7.68 (t, *J* = 7.2 Hz, 1H), 7.55-7.51 (m, 2H), 7.37-7.33 (m, 1H), 7.30-7.26 (m, 2H), 6.66 (d, *J* = 2.4 Hz, 1H), 3.51 (s, 3H); <sup>13</sup>C NMR (100 MHz, CDCl<sub>3</sub>) δ 192.9, 158.4, 143.6, 134.5, 133.52, 133.47, 133.3, 132.7, 131.8, 129.8, 129.3, 129.1, 128.5, 126.9, 126.5, 126.3, 125.3, 121.3, 120.2, 106.3, 55.2; ESI(+)-TOF *m/z* 313 (100, [M + H]<sup>+</sup>); HRMS (ESI(+)-TOF) *m/z* [M + H]<sup>+</sup> calcd for C<sub>22</sub>H<sub>17</sub>O<sub>2</sub> 313.1229, found 313.1225. Anal. Calcd for C<sub>22</sub>H<sub>16</sub>O<sub>2</sub>: C, 84.59; H, 5.16. Found: C, 84.62; H, 5.20.

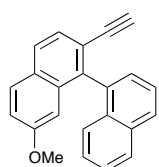

**2-Ethynyl-7-methoxy-1,1'-binaphthyl (M3).**<sup>7</sup> Following a literature procedure,<sup>7</sup> a dried flask equipped with a magnetic stirring bar was loaded with the aldehyde **M2** (770 mg, 2.47 mmol), pre-dried K<sub>3</sub>PO<sub>4</sub> (682 mg, 3.21 mmol) and dissolved in dry methanol (25 mL). Then, the Ohira Bestmann reagent (1.42

g, 7.4 mmol) in methanol (8 mL) was added and the mixture stirred at room temperature for overnight. The reaction mixture was next diluted with Et<sub>2</sub>O, washed with aq. NaHCO<sub>3</sub> solution, dried (Na<sub>2</sub>SO<sub>4</sub>). After evaporation of solvent, the residue was passed through short column chromatography (SiO<sub>2</sub>, pet ether/AcOEt, 19:1) giving 647 mg (85%) of alkyne **M3** as a white solid. Mp 84-87 °C (pet ether/AcOEt, lit.<sup>7</sup> 87-89 °C); <sup>1</sup>H NMR (500 MHz, CDCl<sub>3</sub>) δ 7.99 (m, 2H), 7.85 (dd, *J*<sub>1</sub> = 8.4 Hz, *J*<sub>2</sub> = 6.8 Hz, 2H), 7.65-7.58 (m, 2H), 7.51-7.46 (m, 2H), 7.32 (dd, *J*<sub>1</sub> = 4.8 Hz, *J*<sub>2</sub> = 1.2 Hz, 2H), 7.17 (dd, *J*<sub>1</sub> = 9.2 Hz, *J*<sub>2</sub> = 2.8 Hz, 1H), 6.53 (d, *J* = 2.4 Hz, 1H), 3.47 (s, 3H), 2.79 (s, 1H); <sup>13</sup>C NMR (100 MHz, CDCl<sub>3</sub>) δ 158.2, 140.8, 136.8, 134.2, 133.7, 132.5, 129.6, 128.8, 128.31, 128.28, 128.1, 127.6, 126.9, 126.2, 125.9, 125.6, 120.8, 119.2, 105.6, 83.5, 80.9, 55.2; MS (TOF-AP<sup>+</sup>) *m/z* 309 (100, [M + H]<sup>+</sup>); HRMS (TOF-AP<sup>+</sup>) *m/z* [M+H]<sup>+</sup> calcd for C<sub>23</sub>H<sub>17</sub>O 309.1279, found 309.1266. Anal. Calcd for C<sub>23</sub>H<sub>16</sub>O: C, 89.58; H, 5.23. Found: C, 89.31; H, 5.52.

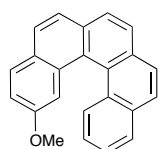

**9-Methoxydibenzo[c,g]phenanthrene (M4).**<sup>7</sup> Following a literature procedure, a solution of 2-ethynyl-7-methoxy-1,1'-binaphthalene (647 mg, 2.10 mmol) and PtCl<sub>2</sub> (56 mg, 0.21 mmol) in dry toluene (11 mL) was stirred at 85 °C for 24 h

under N<sub>2</sub> atmosphere. Then, the reaction mixture was filtered through a short pad of Celite. The filtrate was concentrated under vacuum and the residue was purified by column chromatography (SiO<sub>2</sub>, petroleum ether/AcOEt, 20:1) giving 466 mg (72%) of **M4** as a pale yellow solid. Mp 119-121 °C (hexane, lit.<sup>7</sup> 144-145 °C). <sup>1</sup>H NMR (400 MHz, CDCl<sub>3</sub>) δ 8.49

(d,  $J = 8.4$  Hz, 1H), 7.98-7.85 (m, 8H), 7.79 (d,  $J = 8.8$  Hz, 1H), 7.54-7.50 (m, 1H), 7.36-7.32 (m, 1H), 7.19 (dd,  $J_1 = 8.8$  Hz,  $J_2 = 2.8$  Hz, 1H), 3.50 (s, 3H);  $^{13}\text{C}$  NMR (100 MHz,  $\text{CDCl}_3$ )  $\delta$  156.7, 132.9, 132.8, 132.3, 132.0, 130.4, 129.8, 129.5, 128.1, 127.8, 127.6, 127.4, 127.32, 127.30, 127.2, 126.6, 126.4, 126.3, 124.25, 124.23, 118.2, 109.3, 55.0; MS (TOF-AP $^+$ )  $m/z$  277 (100,  $[\text{M} - \text{OCH}_3]^+$ ), 309 (20,  $[\text{M} + \text{H}]^+$ ); HRMS (TOF-AP $^+$ )  $m/z$   $[\text{M} + \text{H}]^+$  calcd for  $\text{C}_{23}\text{H}_{17}\text{O}$  309.1279, found 309.1280. Anal. Calcd for  $\text{C}_{23}\text{H}_{16}\text{O}$ : C, 89.58; H, 5.23. Found: C, 89.37; H, 5.38.

## 2. NMR spectra

a. bodzioch =bt-o-fen

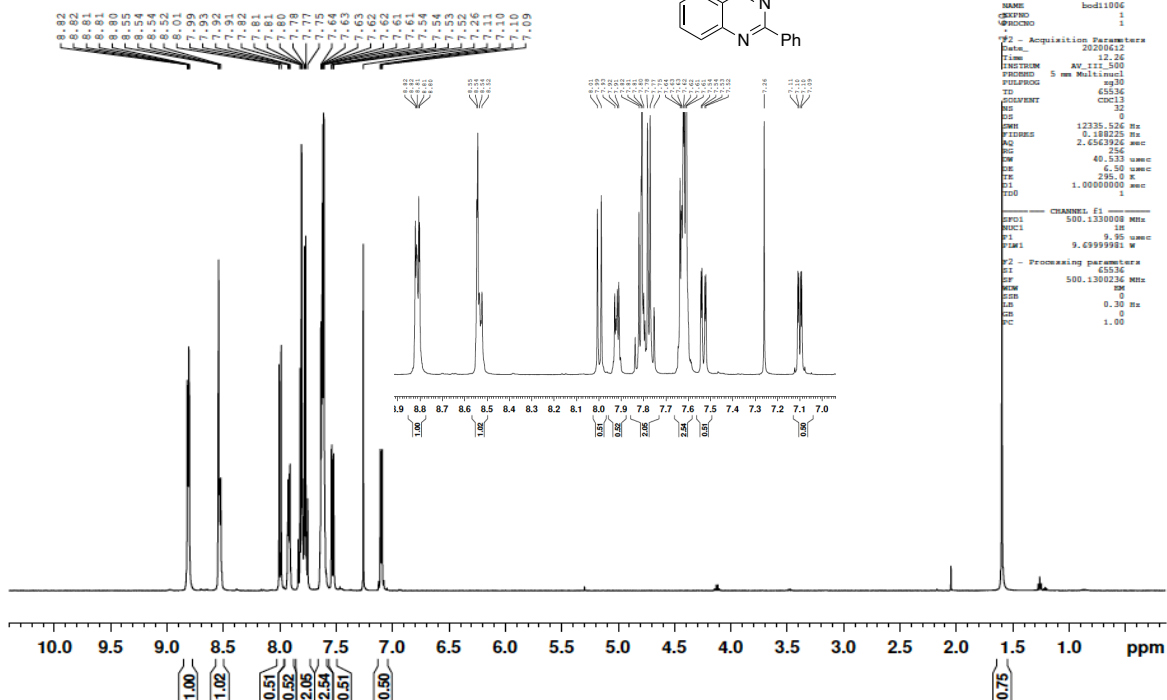

a. bodzioch =BT-O-fen

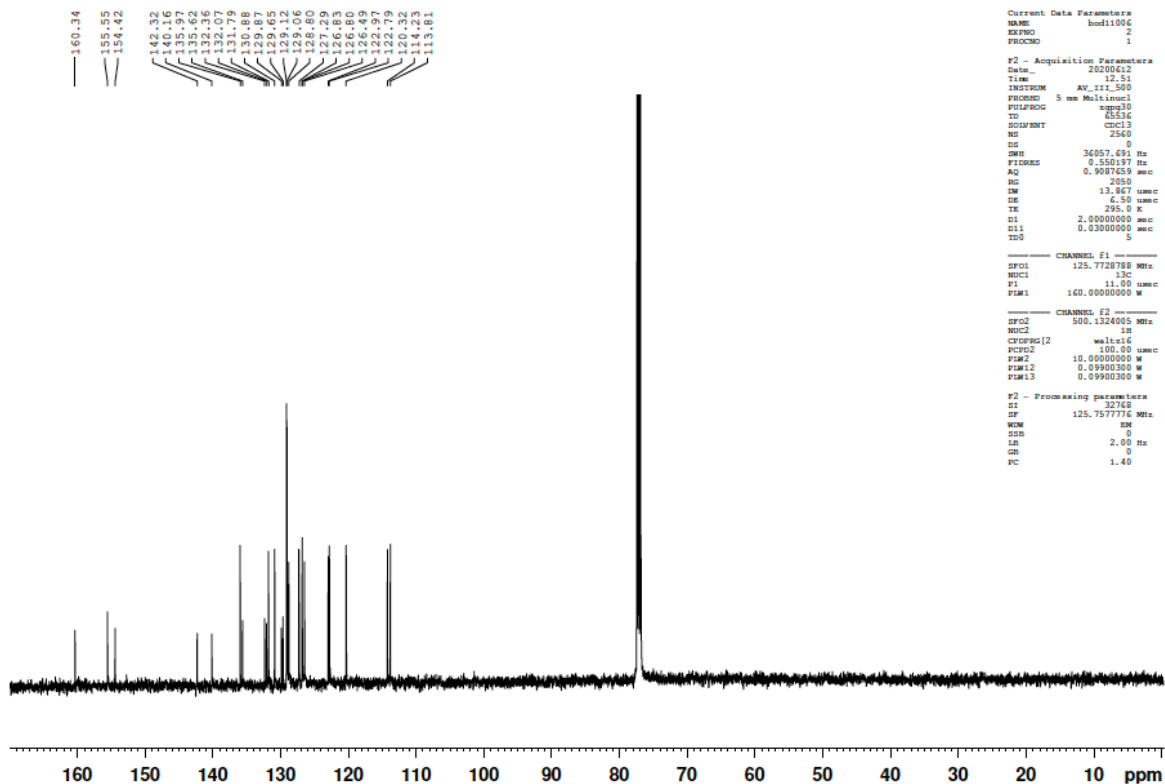

Figure S1.  $^1\text{H}$  and  $^{13}\text{C}\{^1\text{H}\}$  NMR of 3[5] recorded in  $\text{CDCl}_3$  at 500 and 100 MHz, respectively.

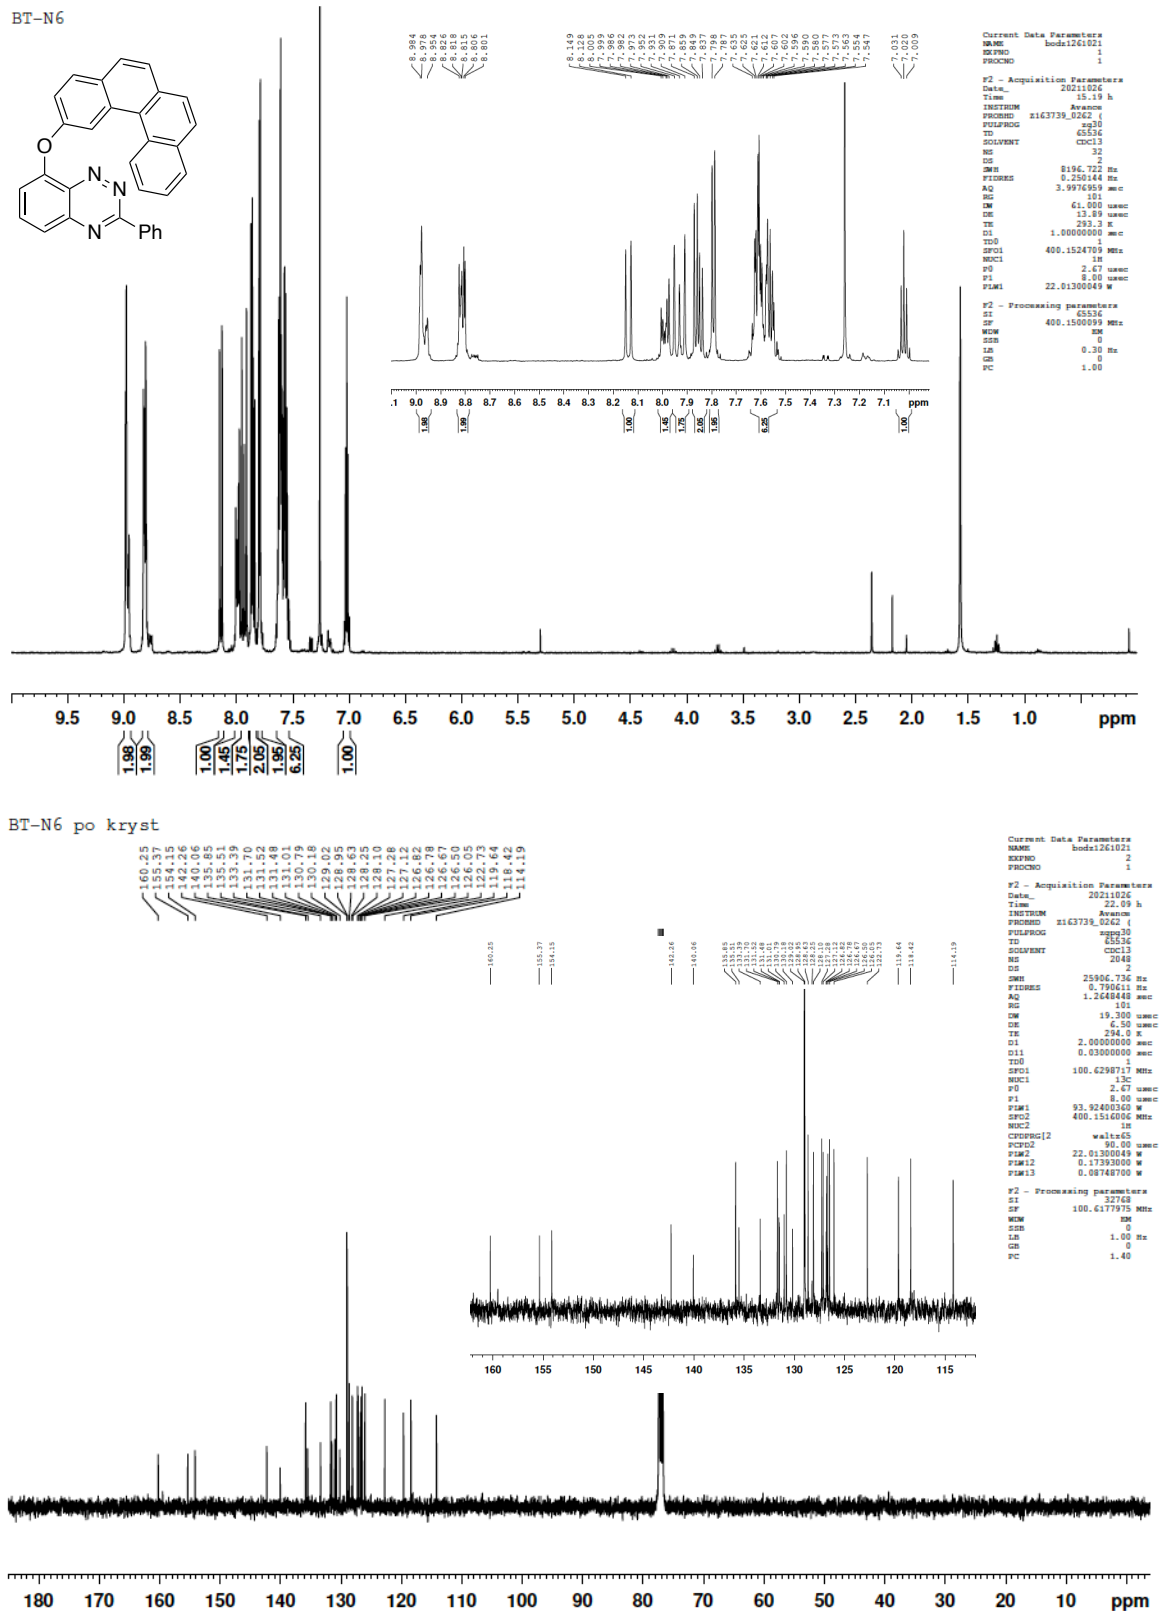

Figure S2.  $^1\text{H}$  and  $^{13}\text{C}\{^1\text{H}\}$  NMR of 3[6] recorded in  $\text{CDCl}_3$  at 400 and 100 MHz, respectively.



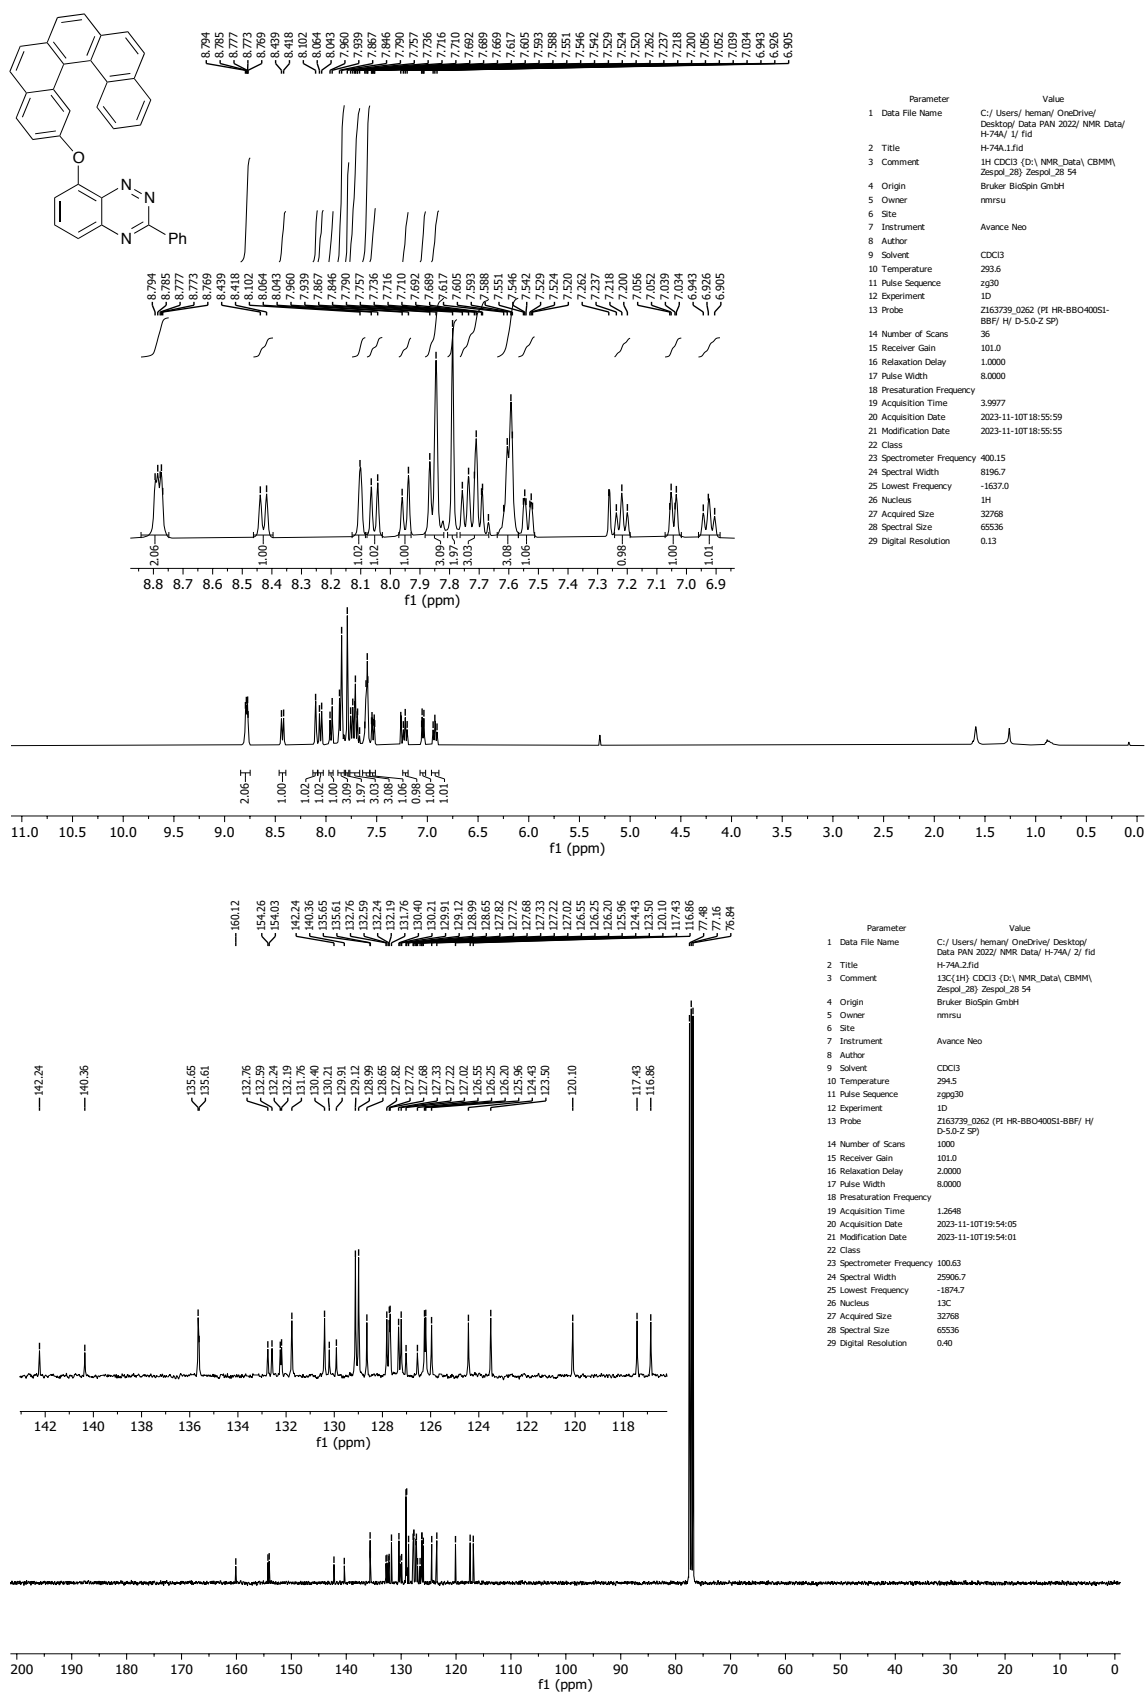

fen-3-OH  
1H CDCl3

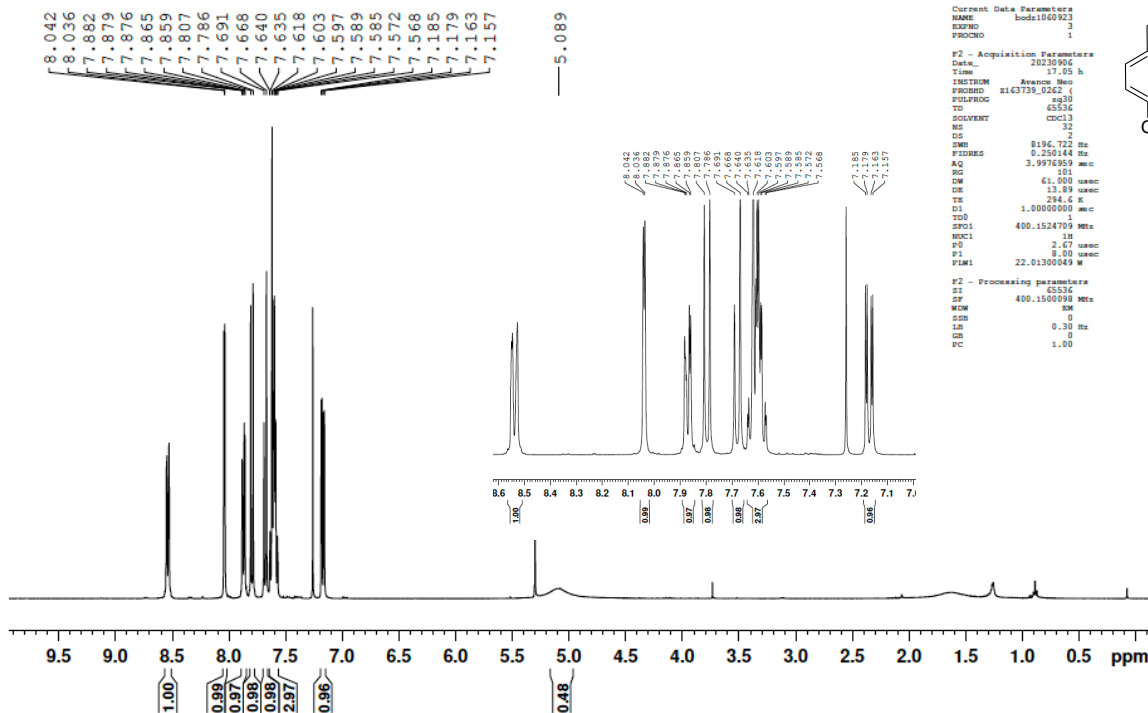

```

Current Data Parameters
NAME      bodz1060923
EXPNO    3
PROCNO   1

F2 - Acquisition Parameters
Date_    20230908
Time     17.05 h
INSTRUM  Avance Neo
PROBHD   H13739_0262 (
PULPROG  zgpg30
TD        65536
SOLVENT  CDCl3
NS        32
DS        2
SWH       8196.722 Hz
FIDRES   0.250144 Hz
AQ        3.9976959 sec
RG         101
DM        61.000 usec
DE         13.89 usec
TE        294.6 K
D1        1.00000000 sec
D11       1
D12       1
SFO1     400.1524769 MHz
NUC1      1H
PQ        2.07 usec
PI        8.00 usec
F1M1     22.01300049 W
F1M2     0
F1M3     0
PC        1.00
  
```

fen-3-OH  
13C{1H} CDCl3

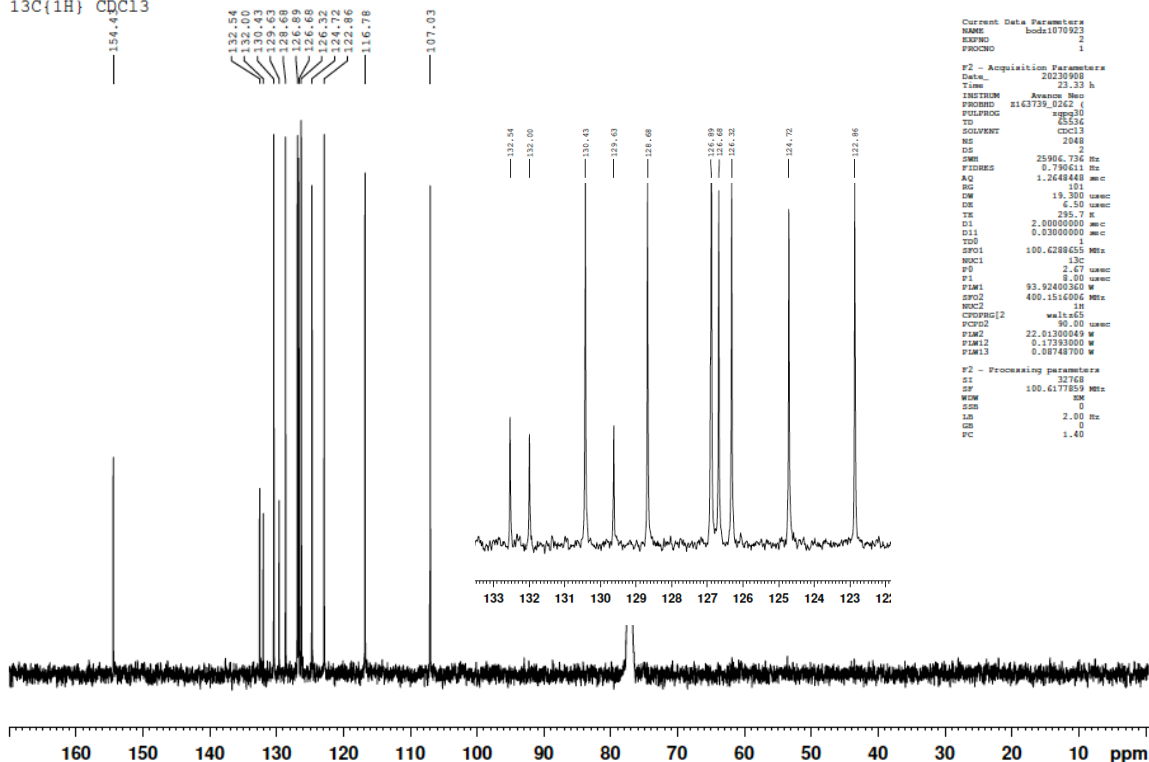

```

Current Data Parameters
NAME      bodz1070923
EXPNO    2
PROCNO   1

F2 - Acquisition Parameters
Date_    20230908
Time     23.33 h
INSTRUM  Avance Neo
PROBHD   H13739_0262 (
PULPROG  zgpg30
TD        65536
SOLVENT  CDCl3
NS        2048
DS        2
SWH       25906.716 Hz
FIDRES   0.790611 Hz
AQ        1.2648448 sec
RG         101
DM        19.300 usec
DE         6.50 usec
TE        295.7 K
D1        2.00000000 sec
D11       0.03000000 sec
D12       1
SFO1     100.6288655 MHz
NUC1      13C
PQ        2.67 usec
PI        8.00 usec
F1M1     92.92460350 W
F1M2     400.1516006 MHz
F1M3     0
PC        1.40
  
```

Figure S4.  $^1\text{H}$  and  $^{13}\text{C}\{^1\text{H}\}$  NMR of **5**[**5**] recorded in  $\text{CDCl}_3$  at 400 and 100 MHz, respectively.

N6 check  
1H CDC13

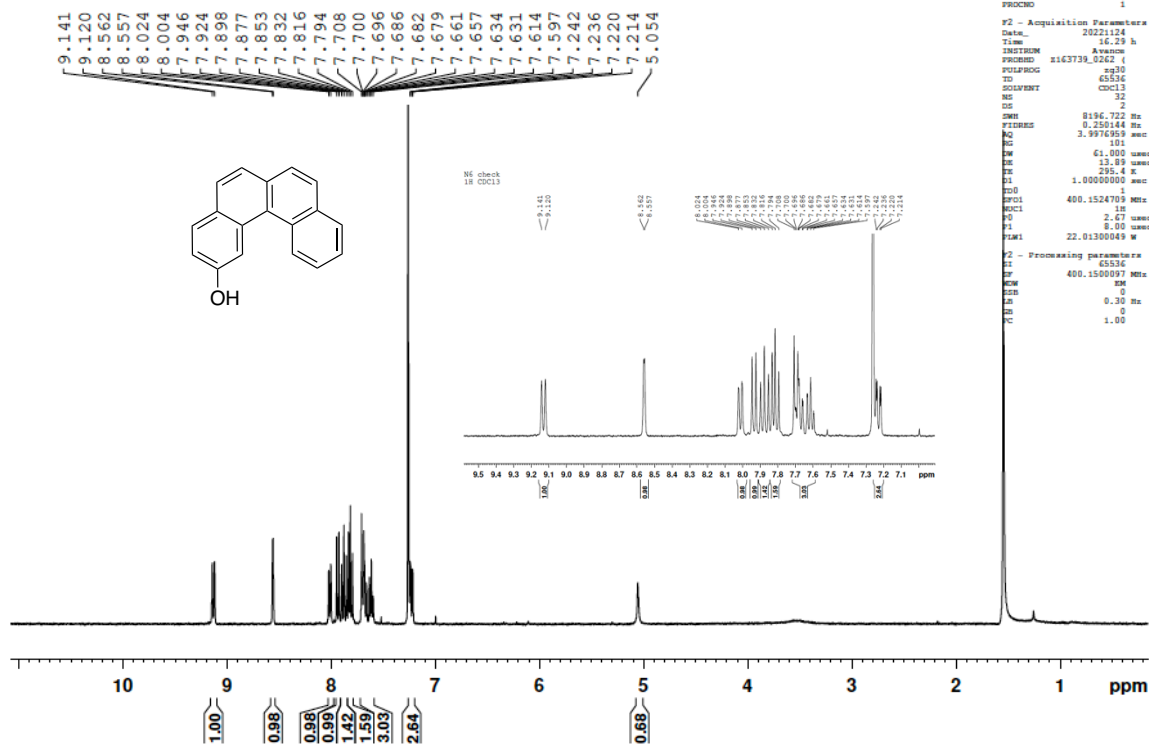

```

Current Data Parameters
NAME      hoda12411
EXPNO    1
PROCNO   1

F2 - Acquisition Parameters
Date_    2023124
Time     16.29 h
INSTRUM  Avance
PROBHD   z163739_0262 (
PULPROG  zgpg
TD        65536
SOLVENT  CDCl3
NS        32
DS        2
SFO1     8196.726 Hz
FIDRES   0.250144 Hz
AQ        3.9976959 sec
RG        101
SWH       61.000 usec
F2       13.89 usec
TE        295.4 K
D1        1.00000000 sec
D11       1
TD0        1
SFO1     400.1524709 MHz
NUC1      1H
FO        2.67 usec
F1        8.00 usec
PLM1     22.01300049 W
PC        1.00

F2 - Processing parameters
SI        32768
SF        100.6171858 MHz
WDW       EM
SSB       0
GB        0
PC        1.00
  
```

N6-OH  
13C{1H} CDC13

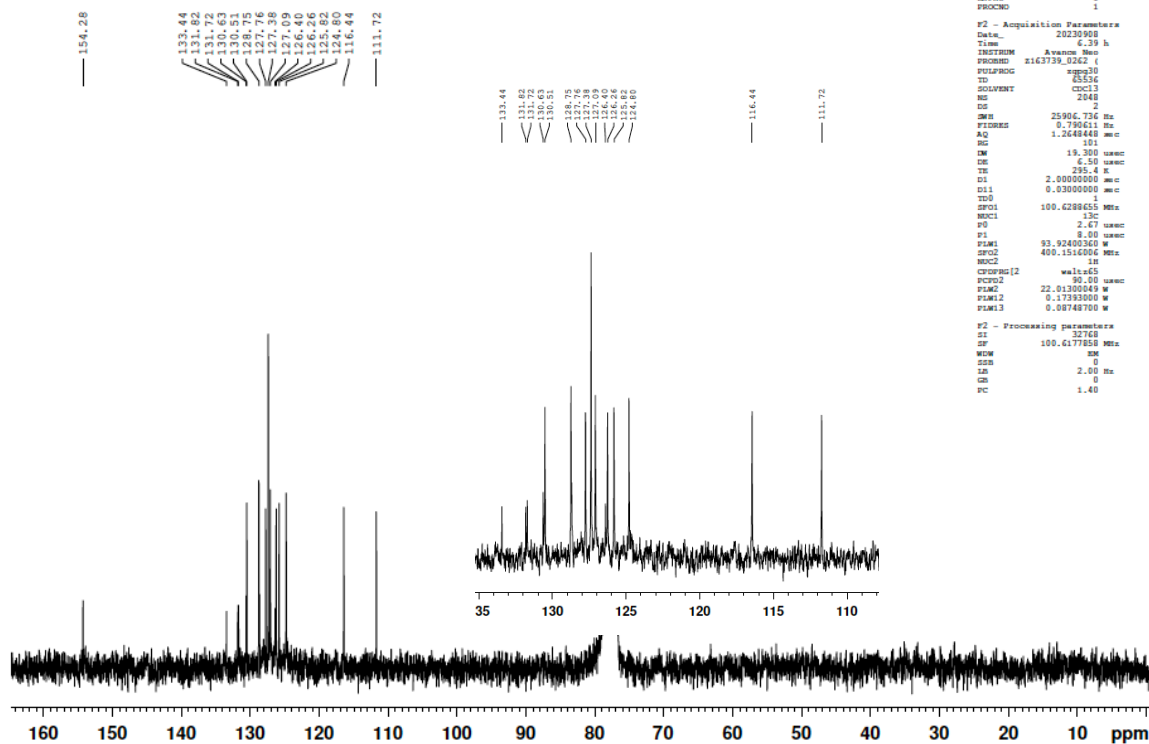

```

Current Data Parameters
NAME      hoda1070923
EXPNO    1
PROCNO   1

F2 - Acquisition Parameters
Date_    20230908
Time     6.35 h
INSTRUM  Avance
PROBHD   z163739_0262 (
PULPROG  zgpg30
TD        65536
SOLVENT  CDCl3
NS        2048
DS        2
SFO1     25906.736 Hz
FIDRES   0.786611 Hz
AQ        1.2648464 sec
RG        101
SWH       19.300 usec
F2       6.50 usec
TE        295.4 K
D1        2.00000000 sec
D11       0.03000000 sec
TD0        1
SFO1     100.6288655 MHz
NUC1      13C
FO        2.67 usec
F1        8.00 usec
PLM1     93.92400360 W
SFO2     400.1516006 MHz
NUC2      1H
CPDPRG2  waltz160
PCPD2    90.00 usec
PLM2     22.01300049 W
PLM3     0.13930000 W
PLM3     0.00748700 W

F2 - Processing parameters
SI        32768
SF        100.6171858 MHz
WDW       EM
SSB       0
GB        0
PC        1.40
  
```

Figure S5. <sup>1</sup>H and <sup>13</sup>C{<sup>1</sup>H} NMR of **5[6]** recorded in CDCl<sub>3</sub> at 400 and 100 MHz, respectively.

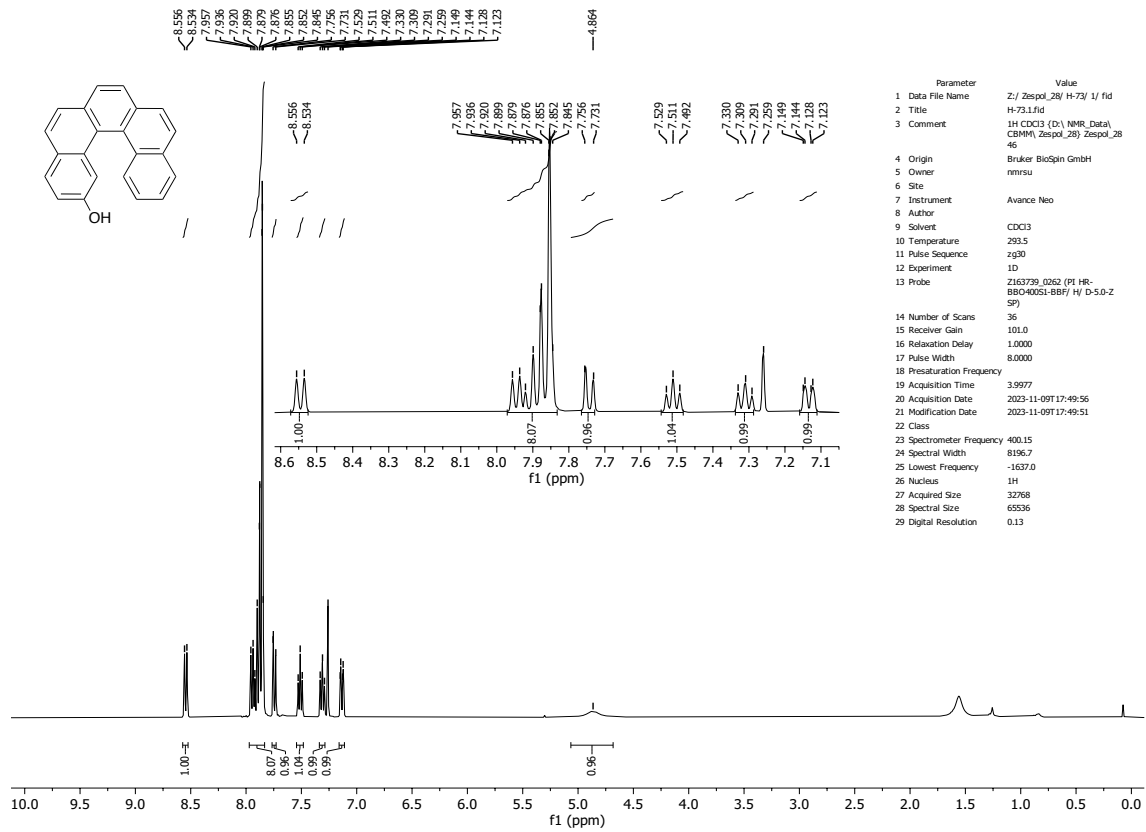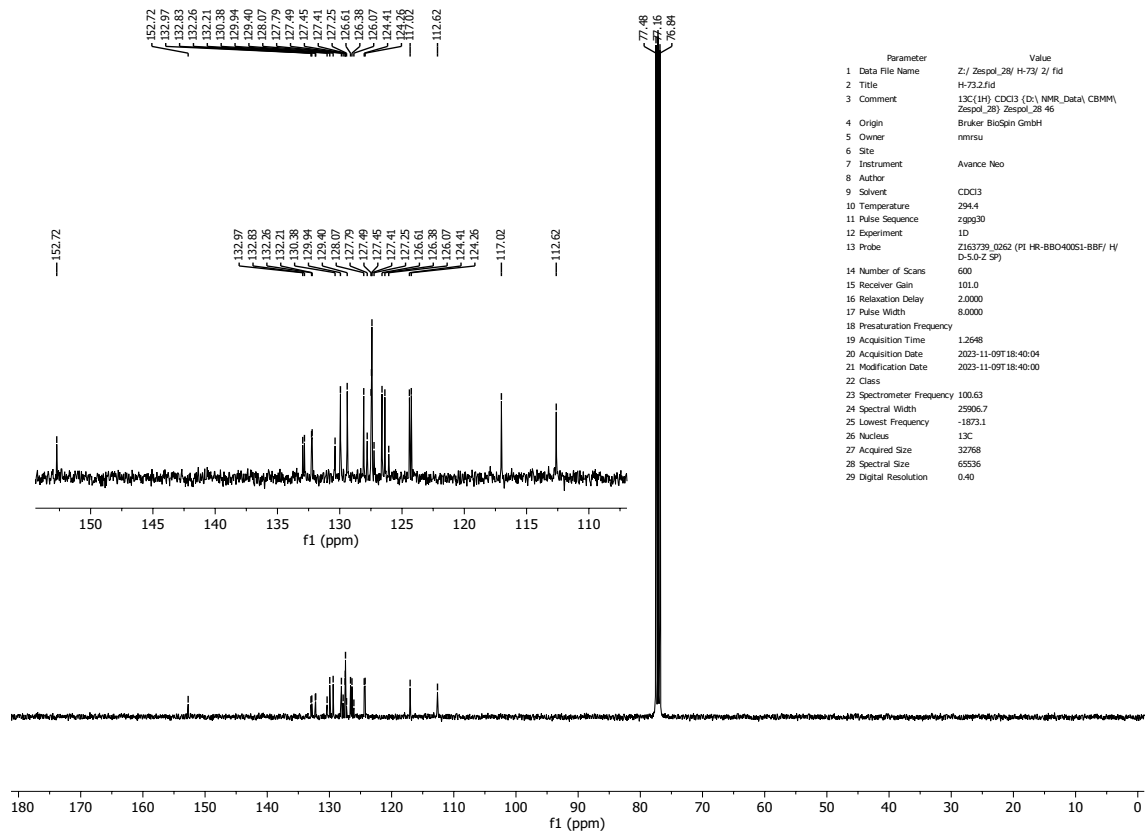

Figure S6. <sup>1</sup>H and <sup>13</sup>C{<sup>1</sup>H} NMR of 5[7] recorded in CDCl<sub>3</sub> at 400 and 100 MHz, respectively.

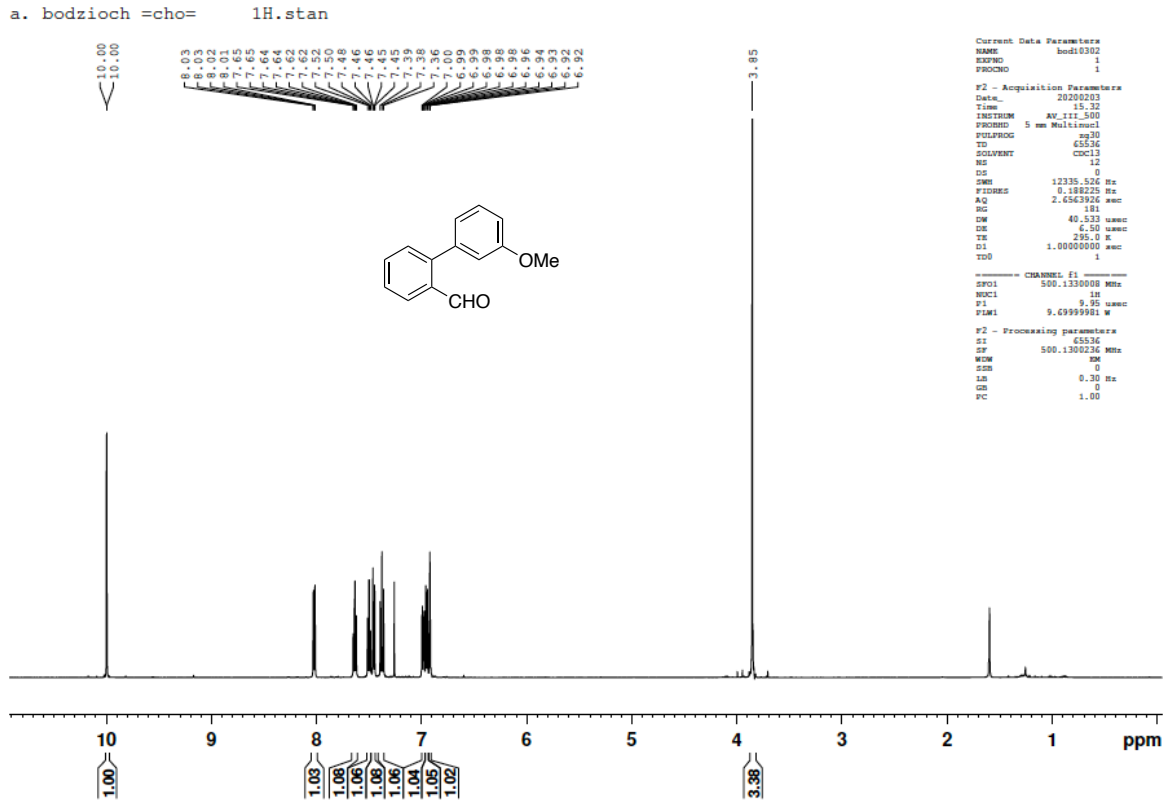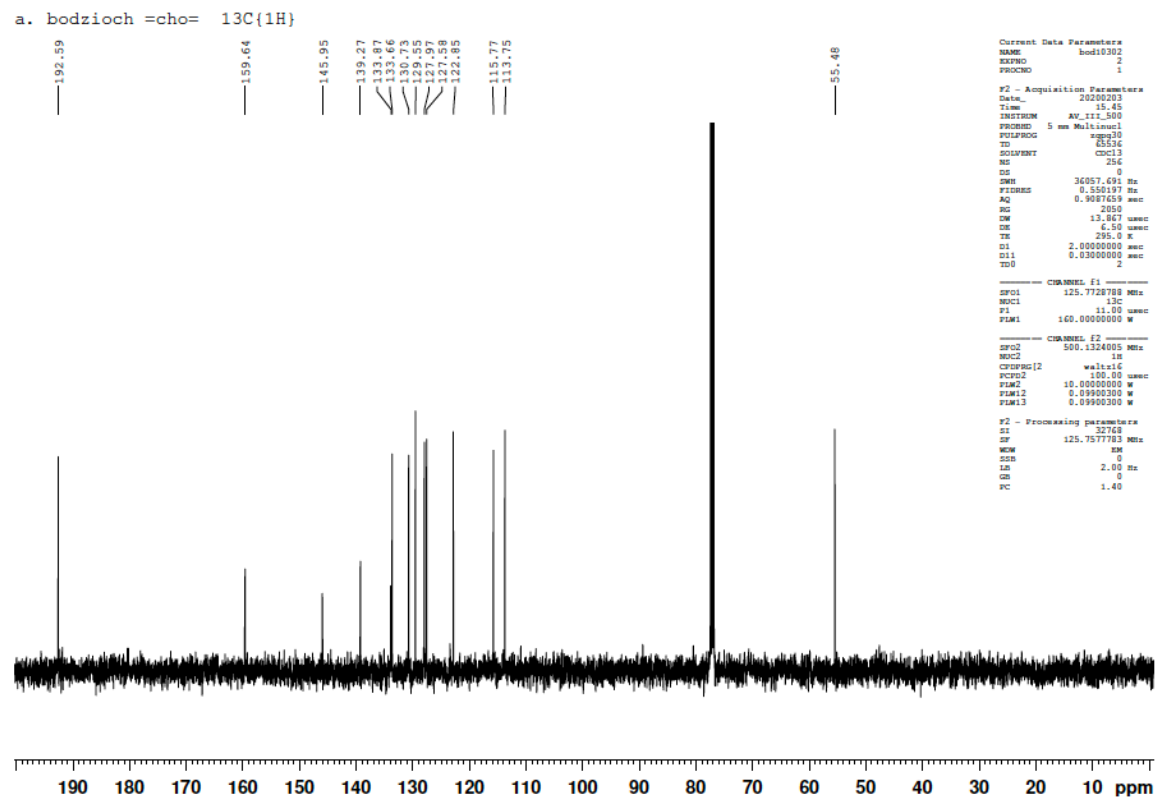

Figure S7.  $^1\text{H}$  and  $^{13}\text{C}\{^1\text{H}\}$  NMR of **S1** recorded in  $\text{CDCl}_3$  at 500 and 125 MHz, respectively.

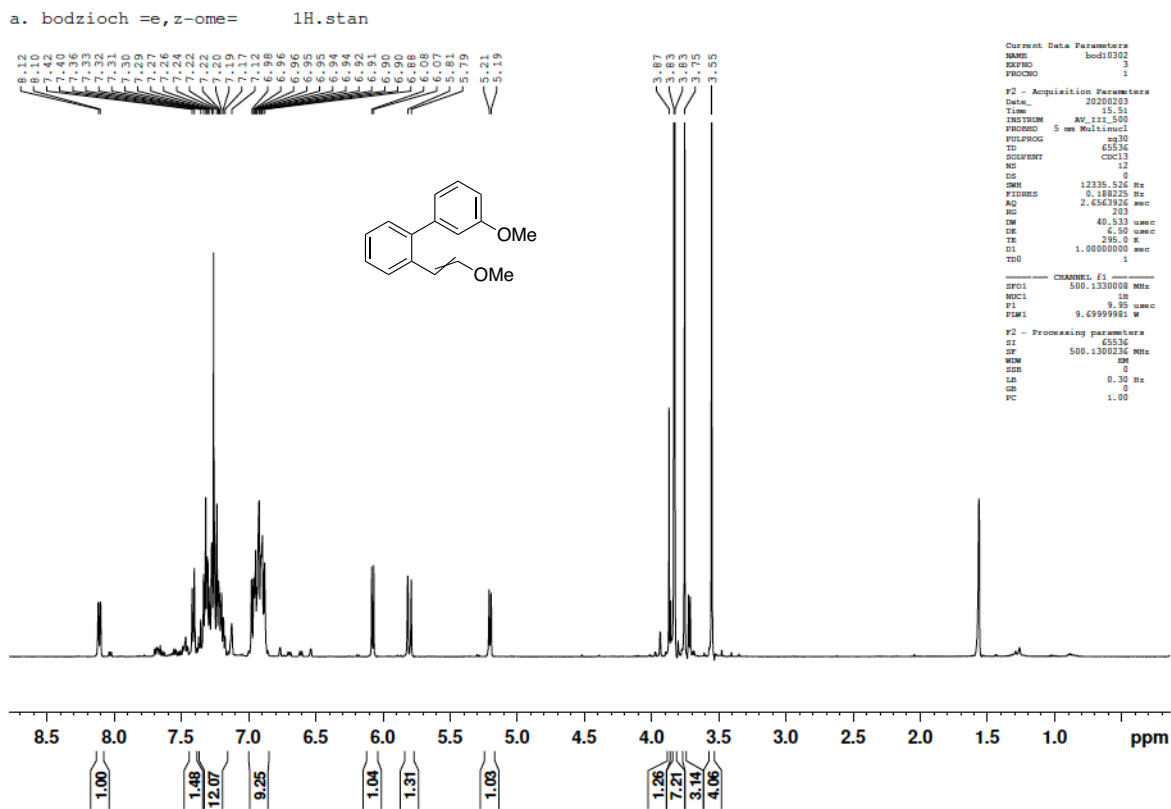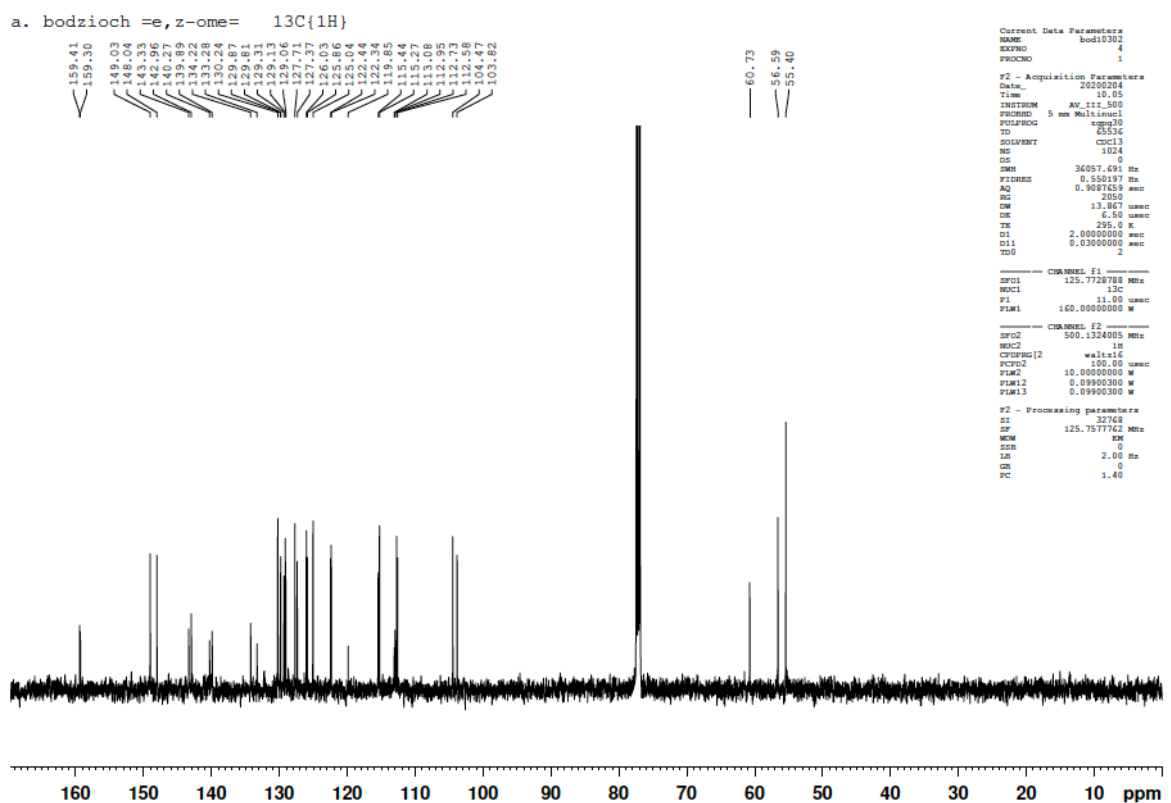

Figure S8.  $^1\text{H}$  and  $^{13}\text{C}\{^1\text{H}\}$  NMR of S2 recorded in  $\text{CDCl}_3$  at 500 and 125 MHz, respectively.

a. bodzioch Fen-3-OMe

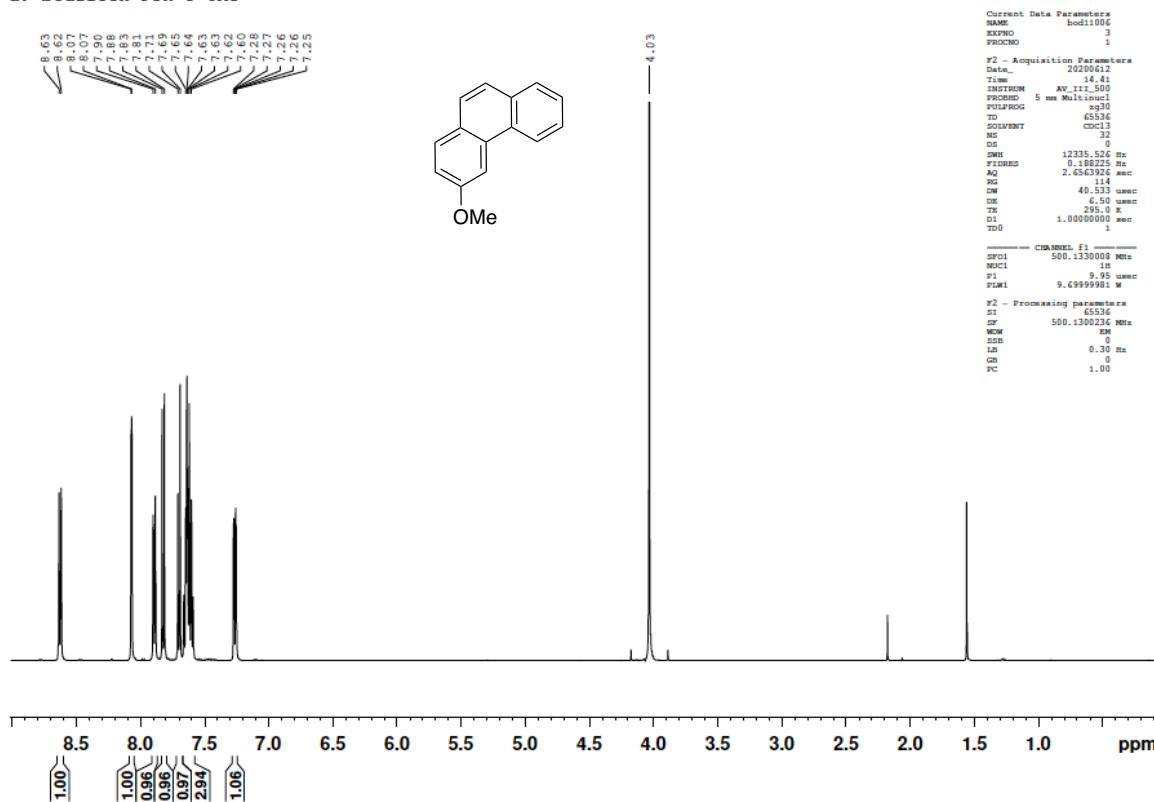

```

Current Data Parameters
NAME      bod1006
EXPNO    3
PROCNO   1

F2 - Acquisition Parameters
Date_    20200612
Time     14.41
INSTRUM  AV_1H_500
PROBHD   5 mm Multispec1
PULPROG  zg30
TD        65536
SOLVENT  CDCl3
NS        32
DS        0
SWH       12335.526 Hz
FIDRES    0.189222 Hz
AQ        2.6563926 sec
RG        114
DW        40.533 usec
DE        6.50 usec
TE        295.2 K
D1        1.00000000 sec
TD0       1

----- CHANNEL f1 -----
SFO1     500.130008 MHz
NUC1     1H
P1       9.95 usec
PLM1     9.69999981 W

F2 - Processing parameters
SI        65536
SF        500.1300236 MHz
WDW       EM
SSB       0
LA        0.30 Hz
GB        0
PC        1.00
    
```

a. bodzioch =Fen-3-OMe= <sup>13</sup>C{<sup>1</sup>H} /5

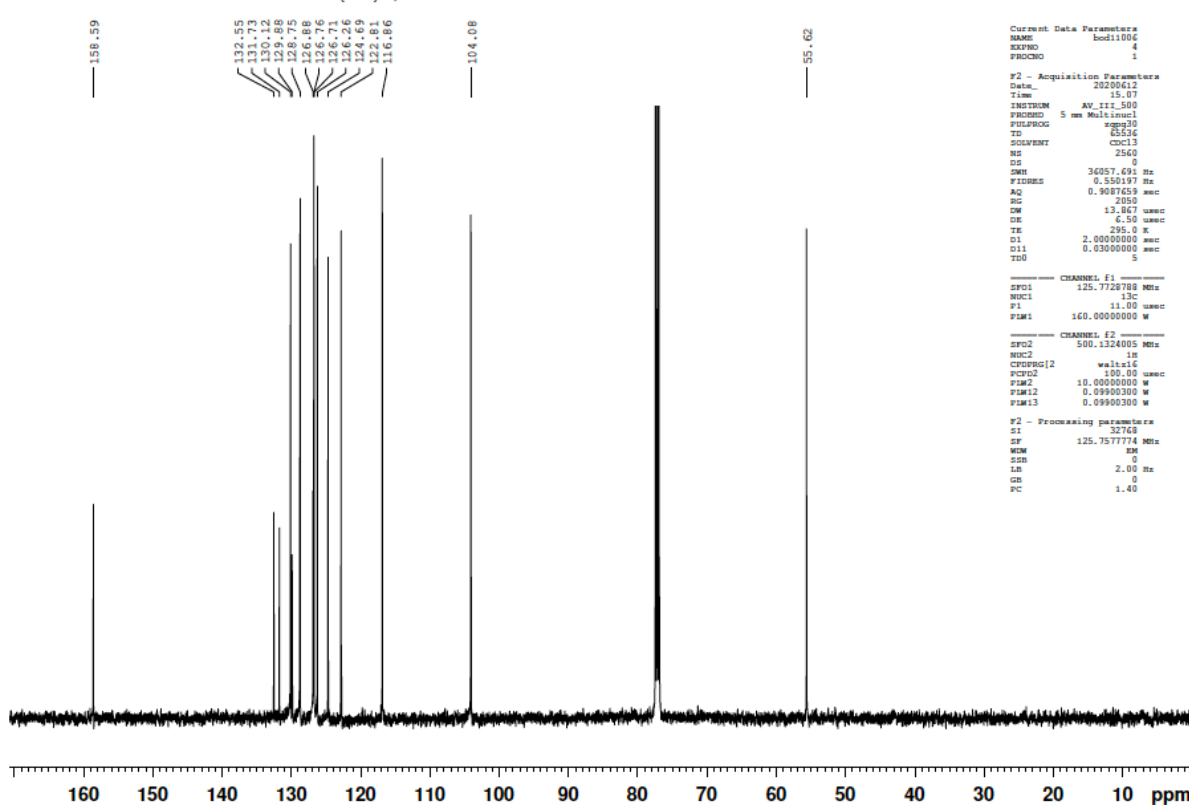

```

Current Data Parameters
NAME      bod1006
EXPNO    4
PROCNO   1

F2 - Acquisition Parameters
Date_    20200612
Time     15.07
INSTRUM  AV_1H_500
PROBHD   5 mm Multispec1
PULPROG  zgpg30
TD        65536
SOLVENT  CDCl3
NS        2560
DS        0
SWH       36057.691 Hz
FIDRES    0.550197 Hz
AQ        0.9087659 sec
RG        2850
DW        13.867 usec
DE        6.50 usec
TE        295.2 K
D1        2.00000000 sec
D11       0.03000000 sec
TD0       5

----- CHANNEL f1 -----
SFO1     125.7728788 MHz
NUC1     13C
P1       11.00 usec
PLM1     160.00000000 W

----- CHANNEL f2 -----
SFO2     500.1324005 MHz
NUC2     1H
CPDPRG2  waltz16
PCPD2    100.00 usec
PLM2     10.00000000 W
PLM12    0.09900300 W
PLM13    0.09900300 W

F2 - Processing parameters
SI        32768
SF        125.7577774 MHz
WDW       EM
SSB       0
LA        2.00 Hz
GB        0
PC        1.40
    
```

Figure S9. <sup>1</sup>H and <sup>13</sup>C{<sup>1</sup>H} NMR of S3 recorded in CDCl<sub>3</sub> at 500 and 125 MHz, respectively.

a. bodzioch =n-1=  
1H.stan CDC13

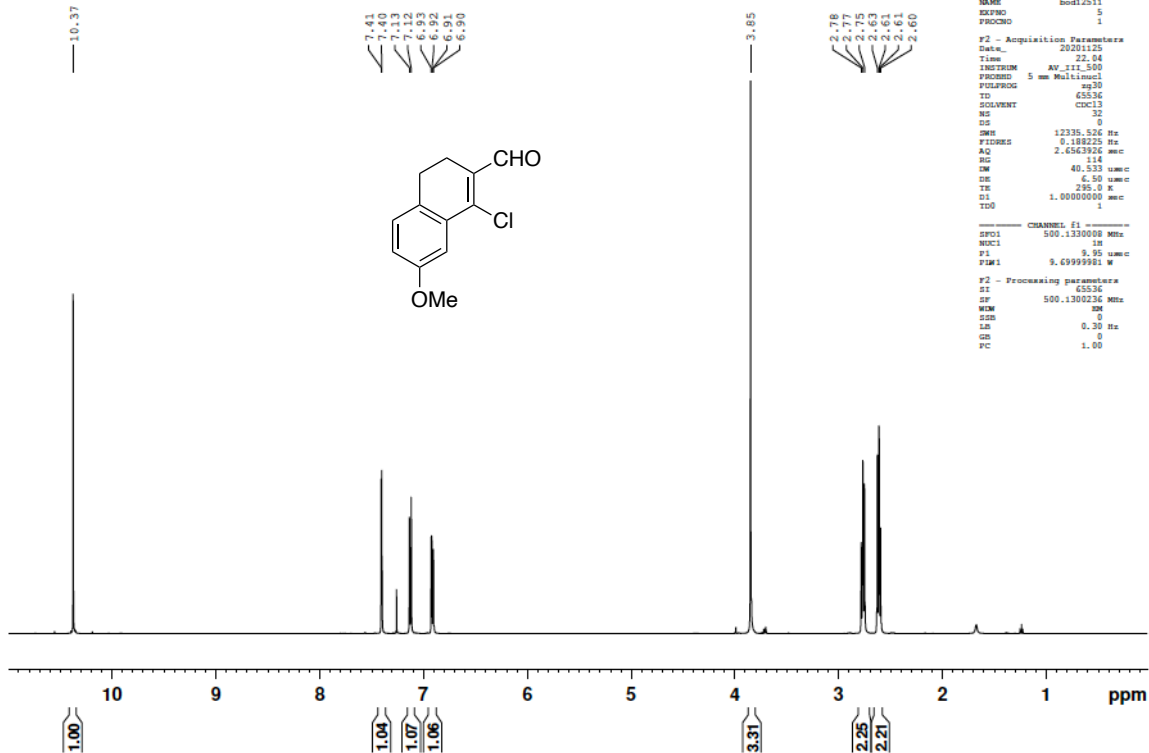

a. bodzioch =n-1=  
A-13C.stan CDC13

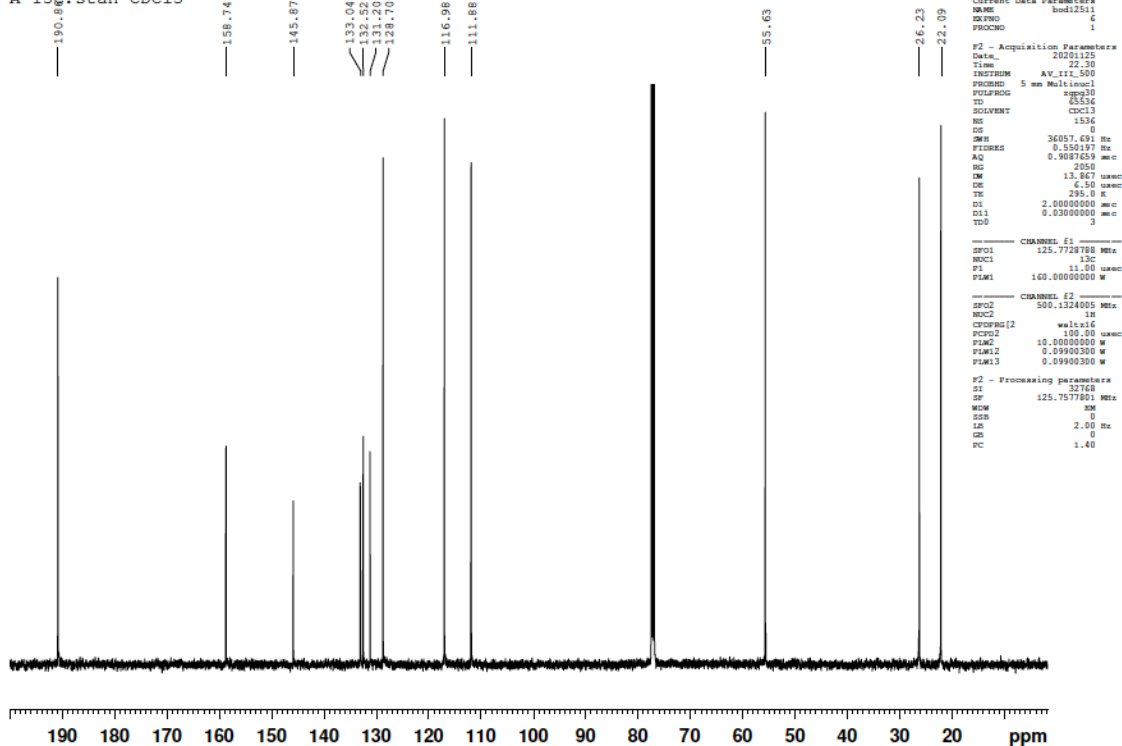

Figure S10. <sup>1</sup>H and <sup>13</sup>C{<sup>1</sup>H} NMR of N1 recorded in CDCl<sub>3</sub> at 500 and 125 MHz, respectively.



a. bodzioch =n-2=  
1H.stan CDCl3

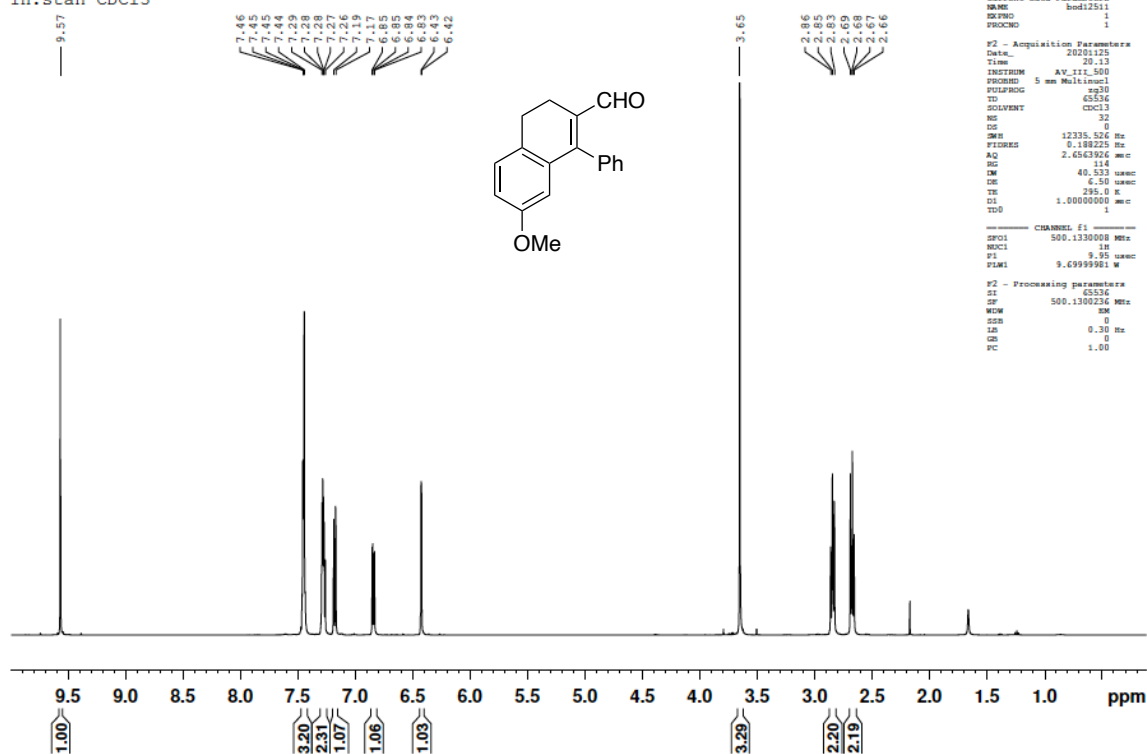

a. bodzioch =n-2=  
A-13C.stan CDCl3

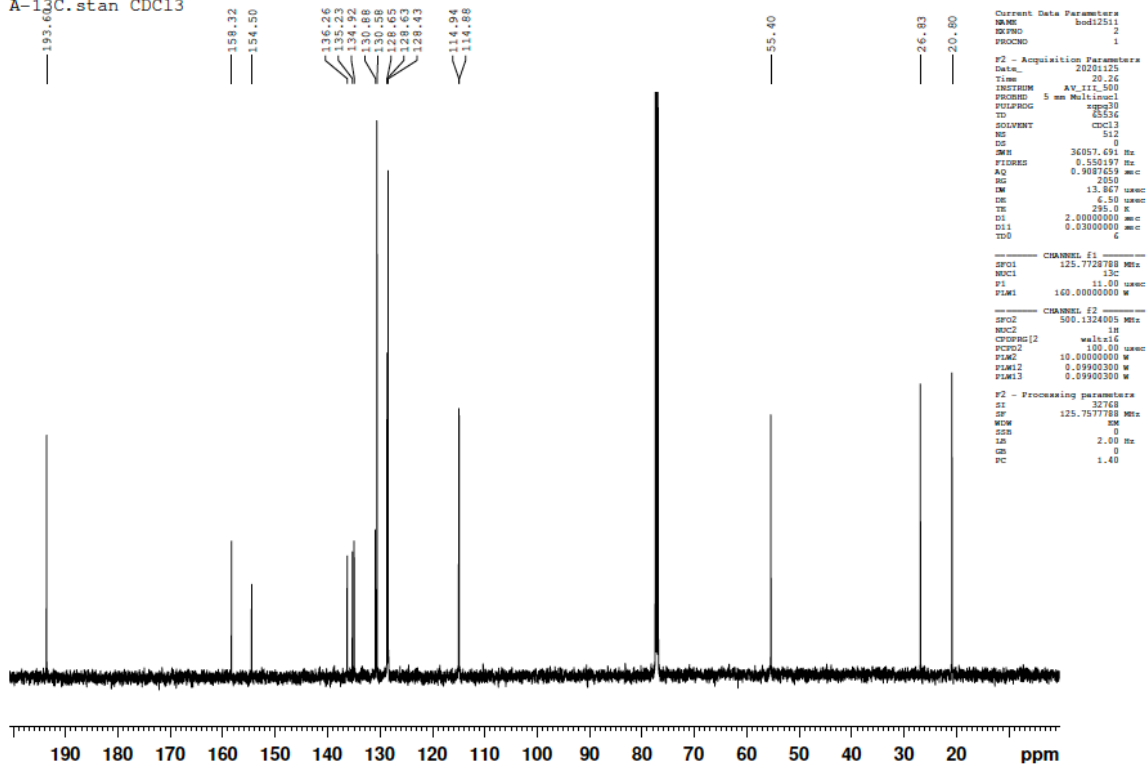

Figure S11.  $^1\text{H}$  and  $^{13}\text{C}\{^1\text{H}\}$  NMR of N2 recorded in  $\text{CDCl}_3$  at 500 and 125 MHz, respectively.

a. bodzioch =N-3=  
<sup>1</sup>H.stan CDC13

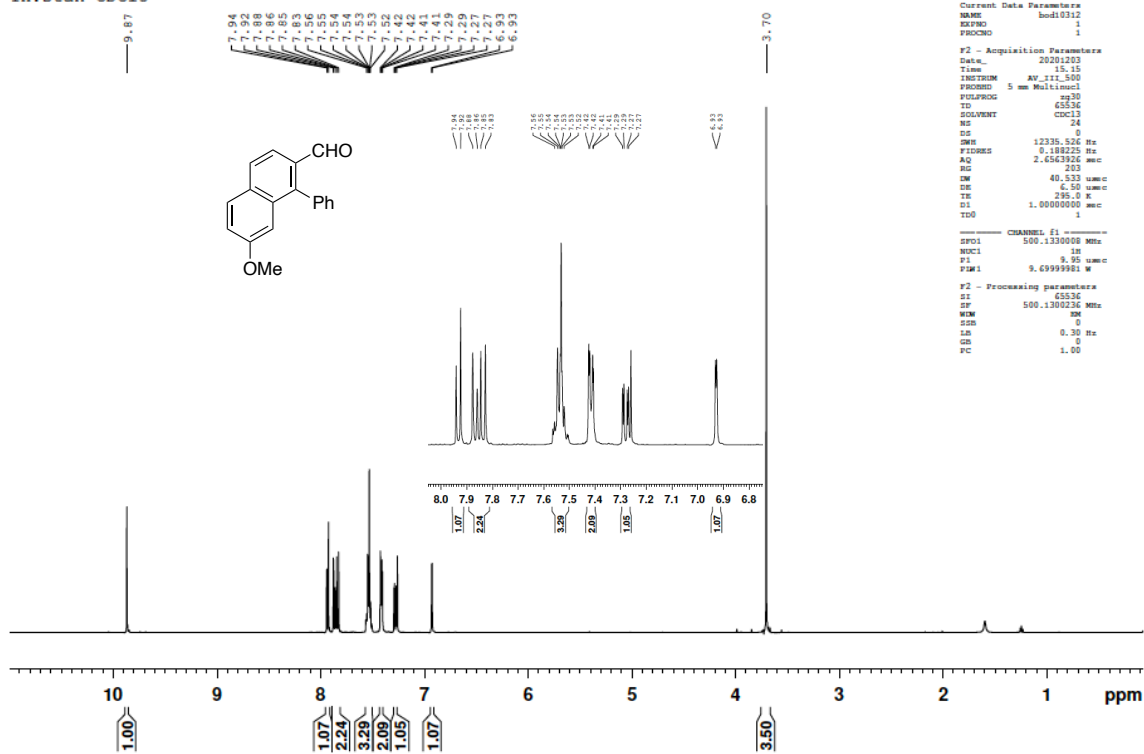

a. bodzioch =n-3=  
A-<sup>13</sup>C.stan CDC13

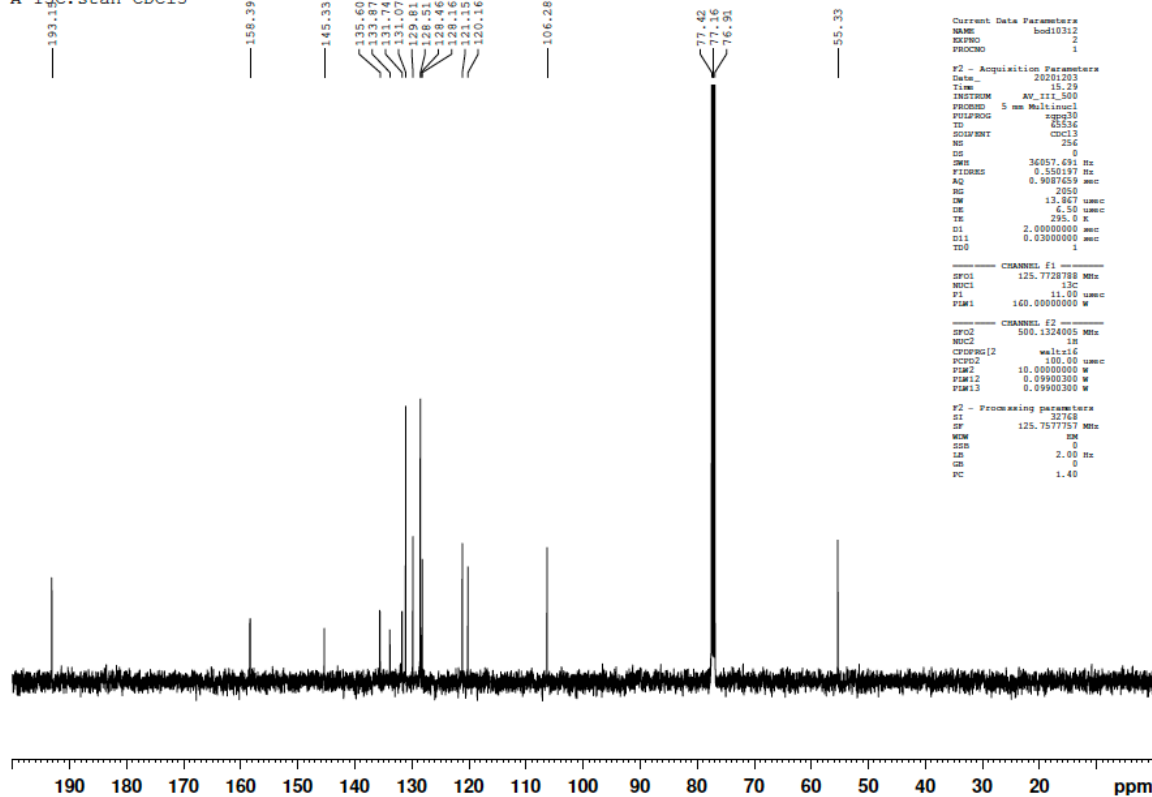

Figure S12. <sup>1</sup>H and <sup>13</sup>C{<sup>1</sup>H} NMR of N3 recorded in CDCl<sub>3</sub> at 500 and 125 MHz, respectively.

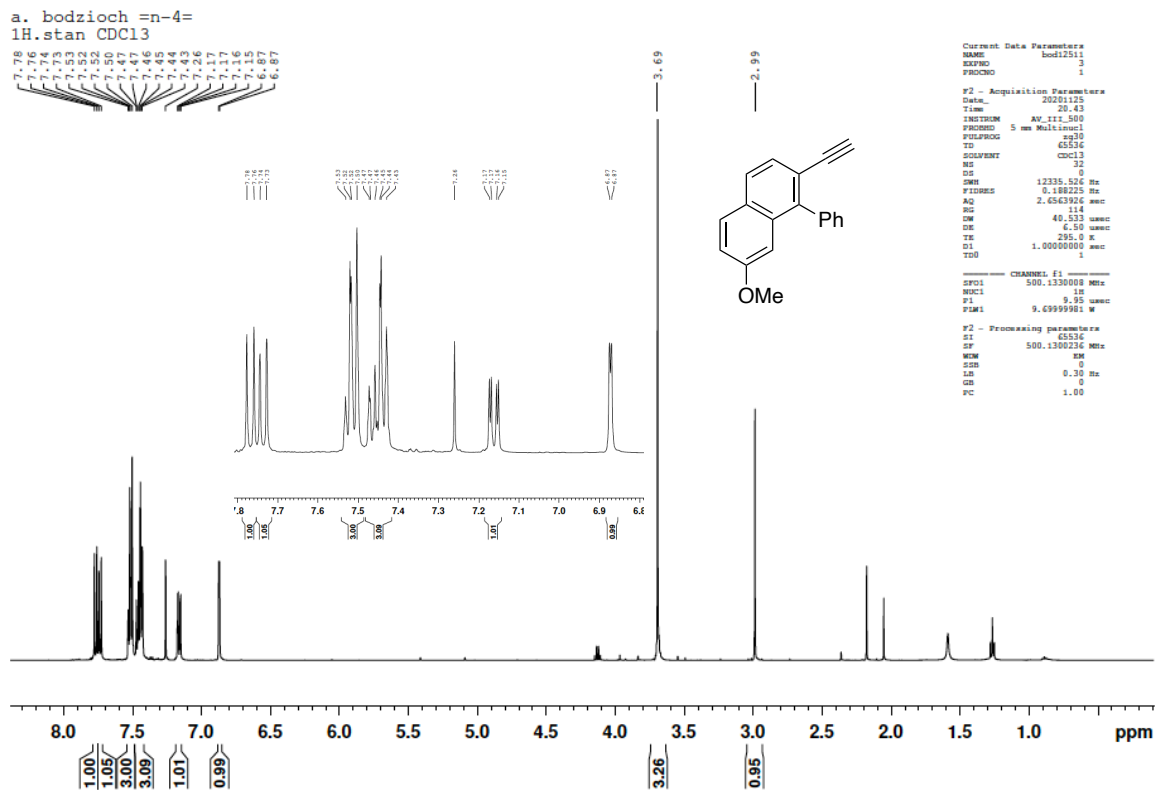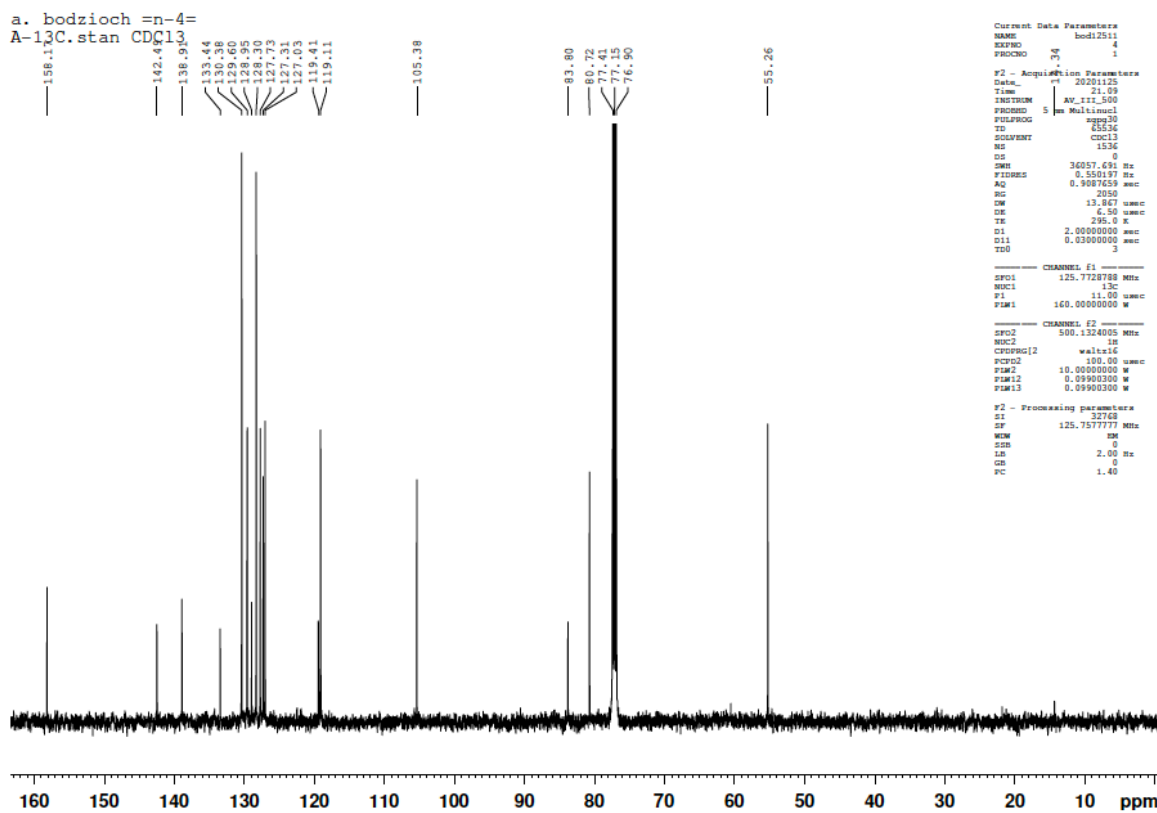

Figure S13.  $^1\text{H}$  and  $^{13}\text{C}\{^1\text{H}\}$  NMR of N4 recorded in  $\text{CDCl}_3$  at 500 and 125 MHz, respectively.

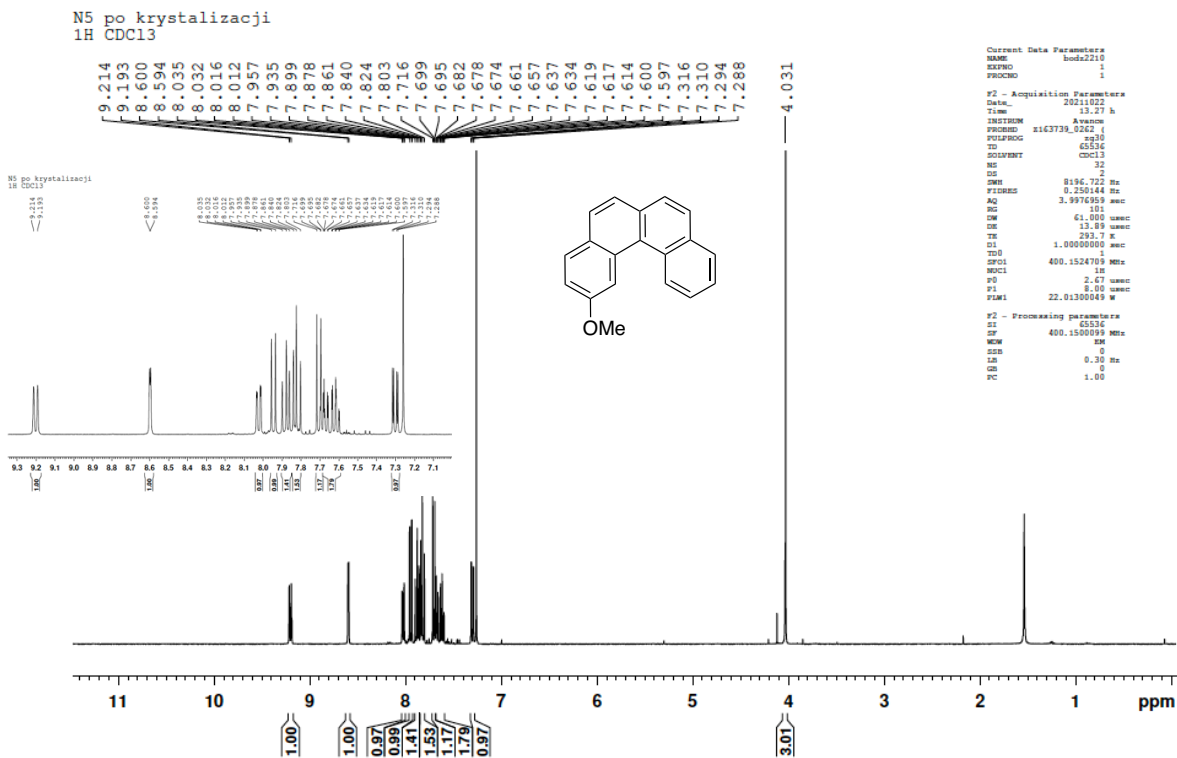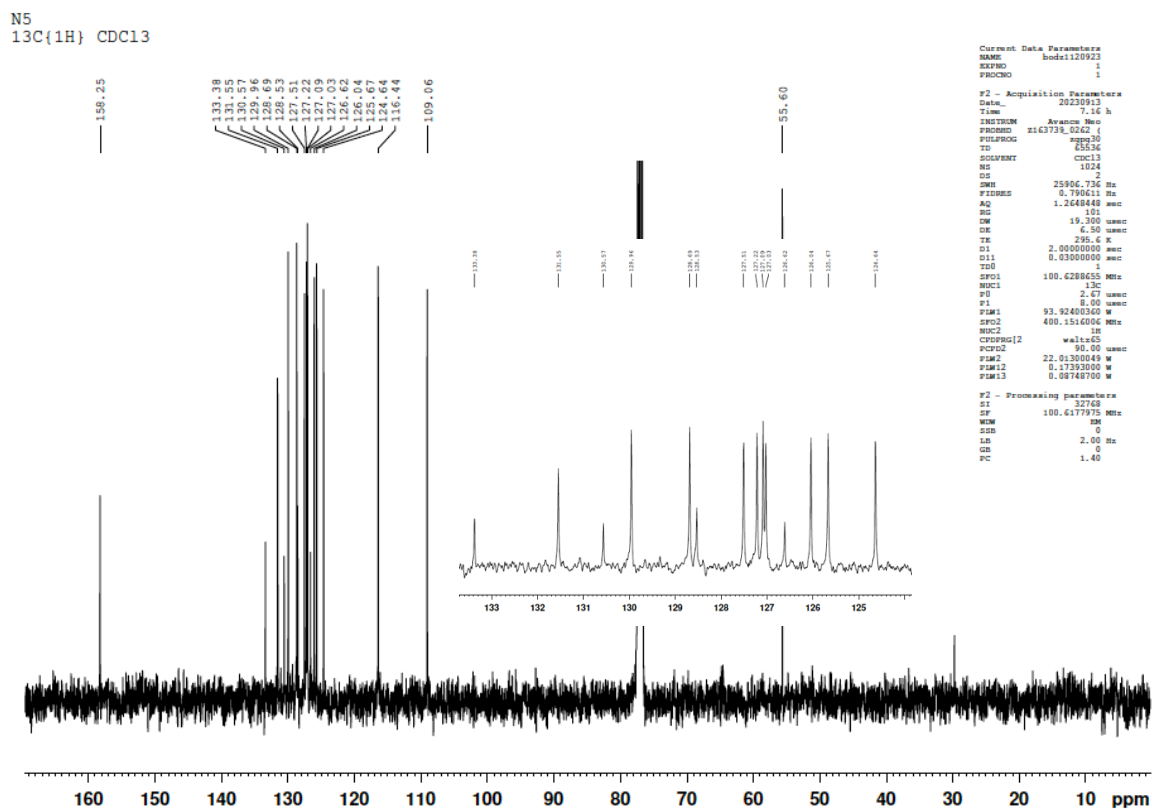

Figure S14. <sup>1</sup>H and <sup>13</sup>C{<sup>1</sup>H} NMR of N5 recorded in CDCl<sub>3</sub> at 400 and 100 MHz, respectively.

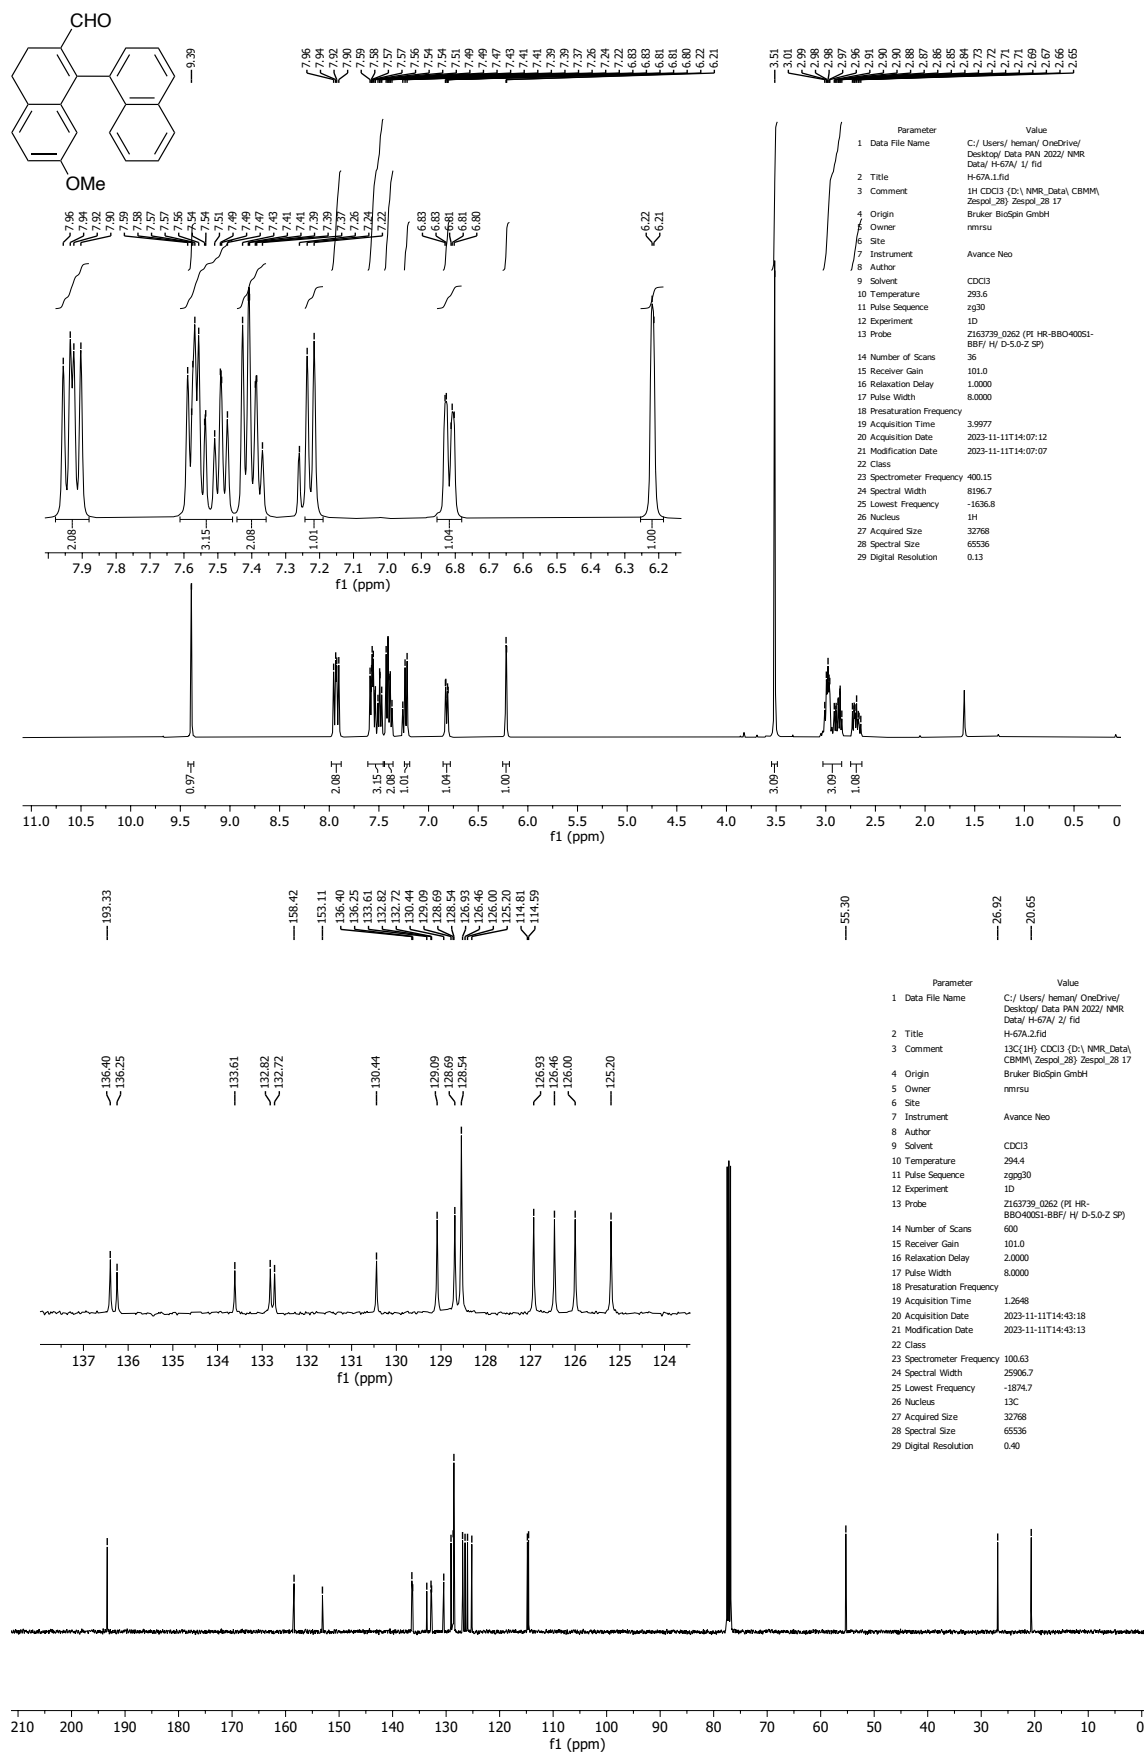

**Figure S15.** <sup>1</sup>H and <sup>13</sup>C{<sup>1</sup>H} NMR of **M1** recorded in CDCl<sub>3</sub> at 400 and 100 MHz, respectively.

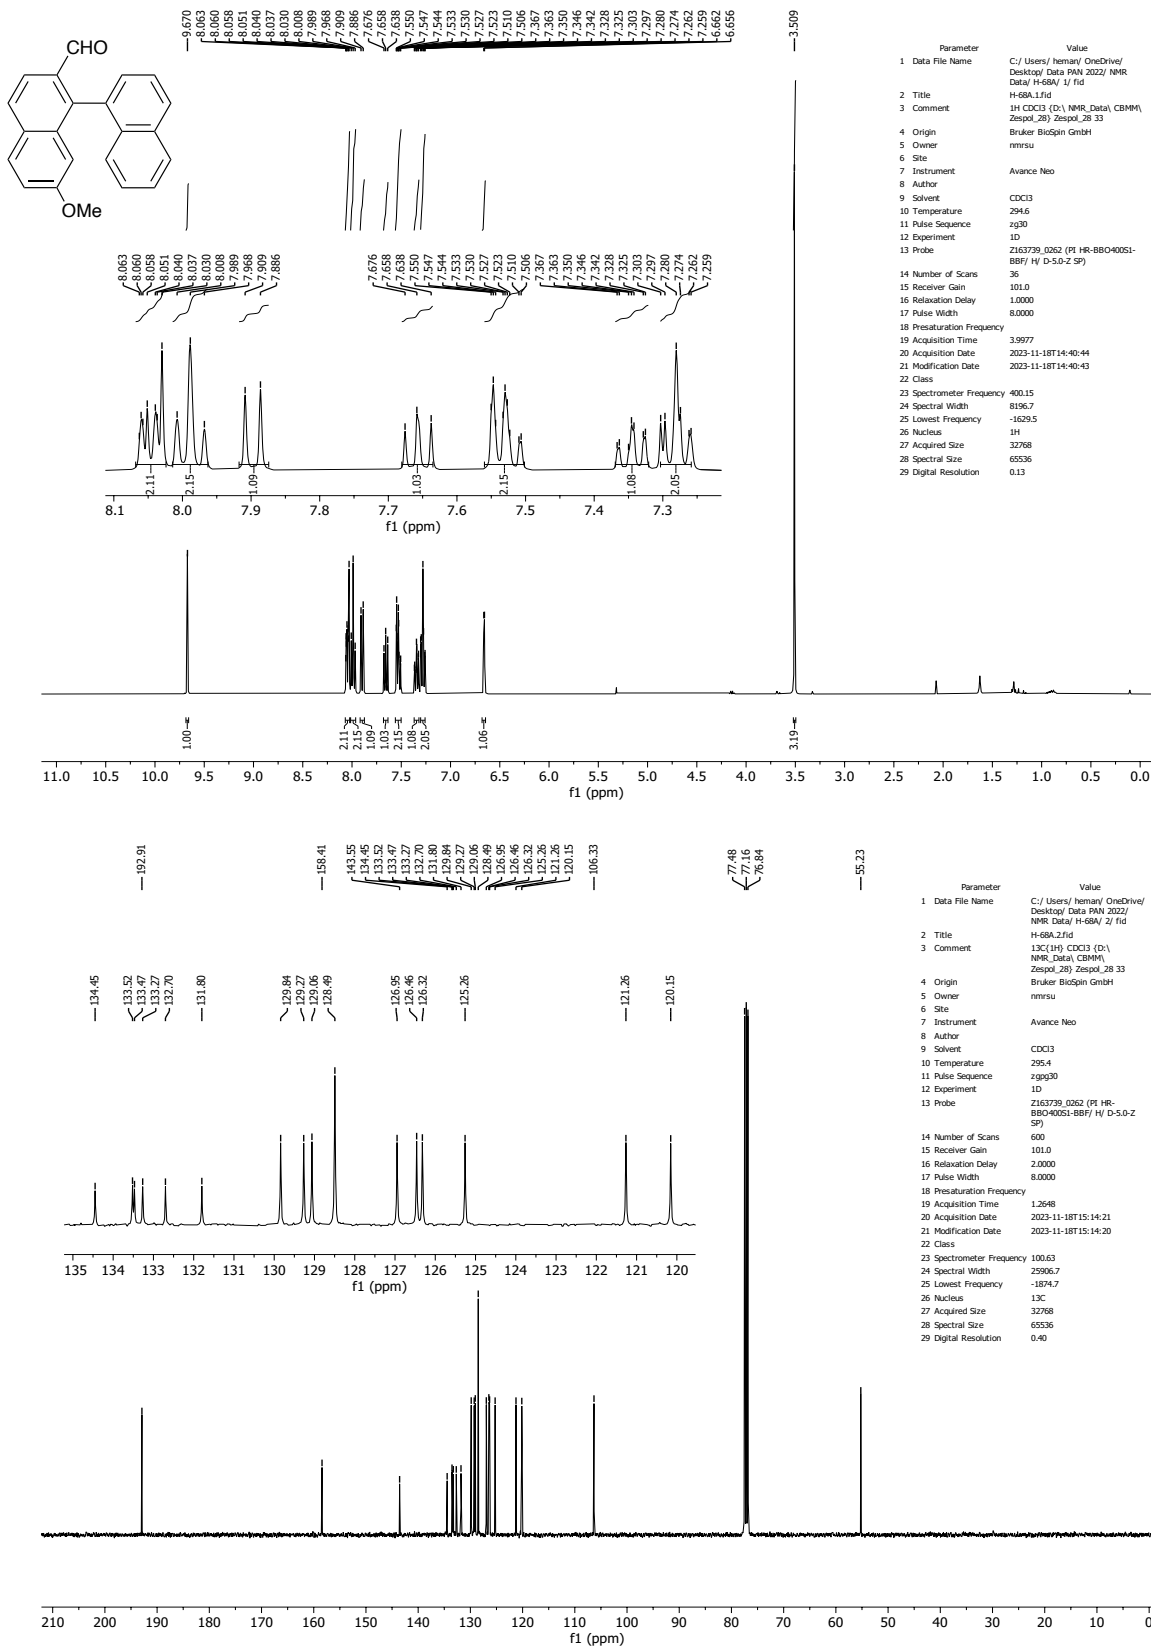

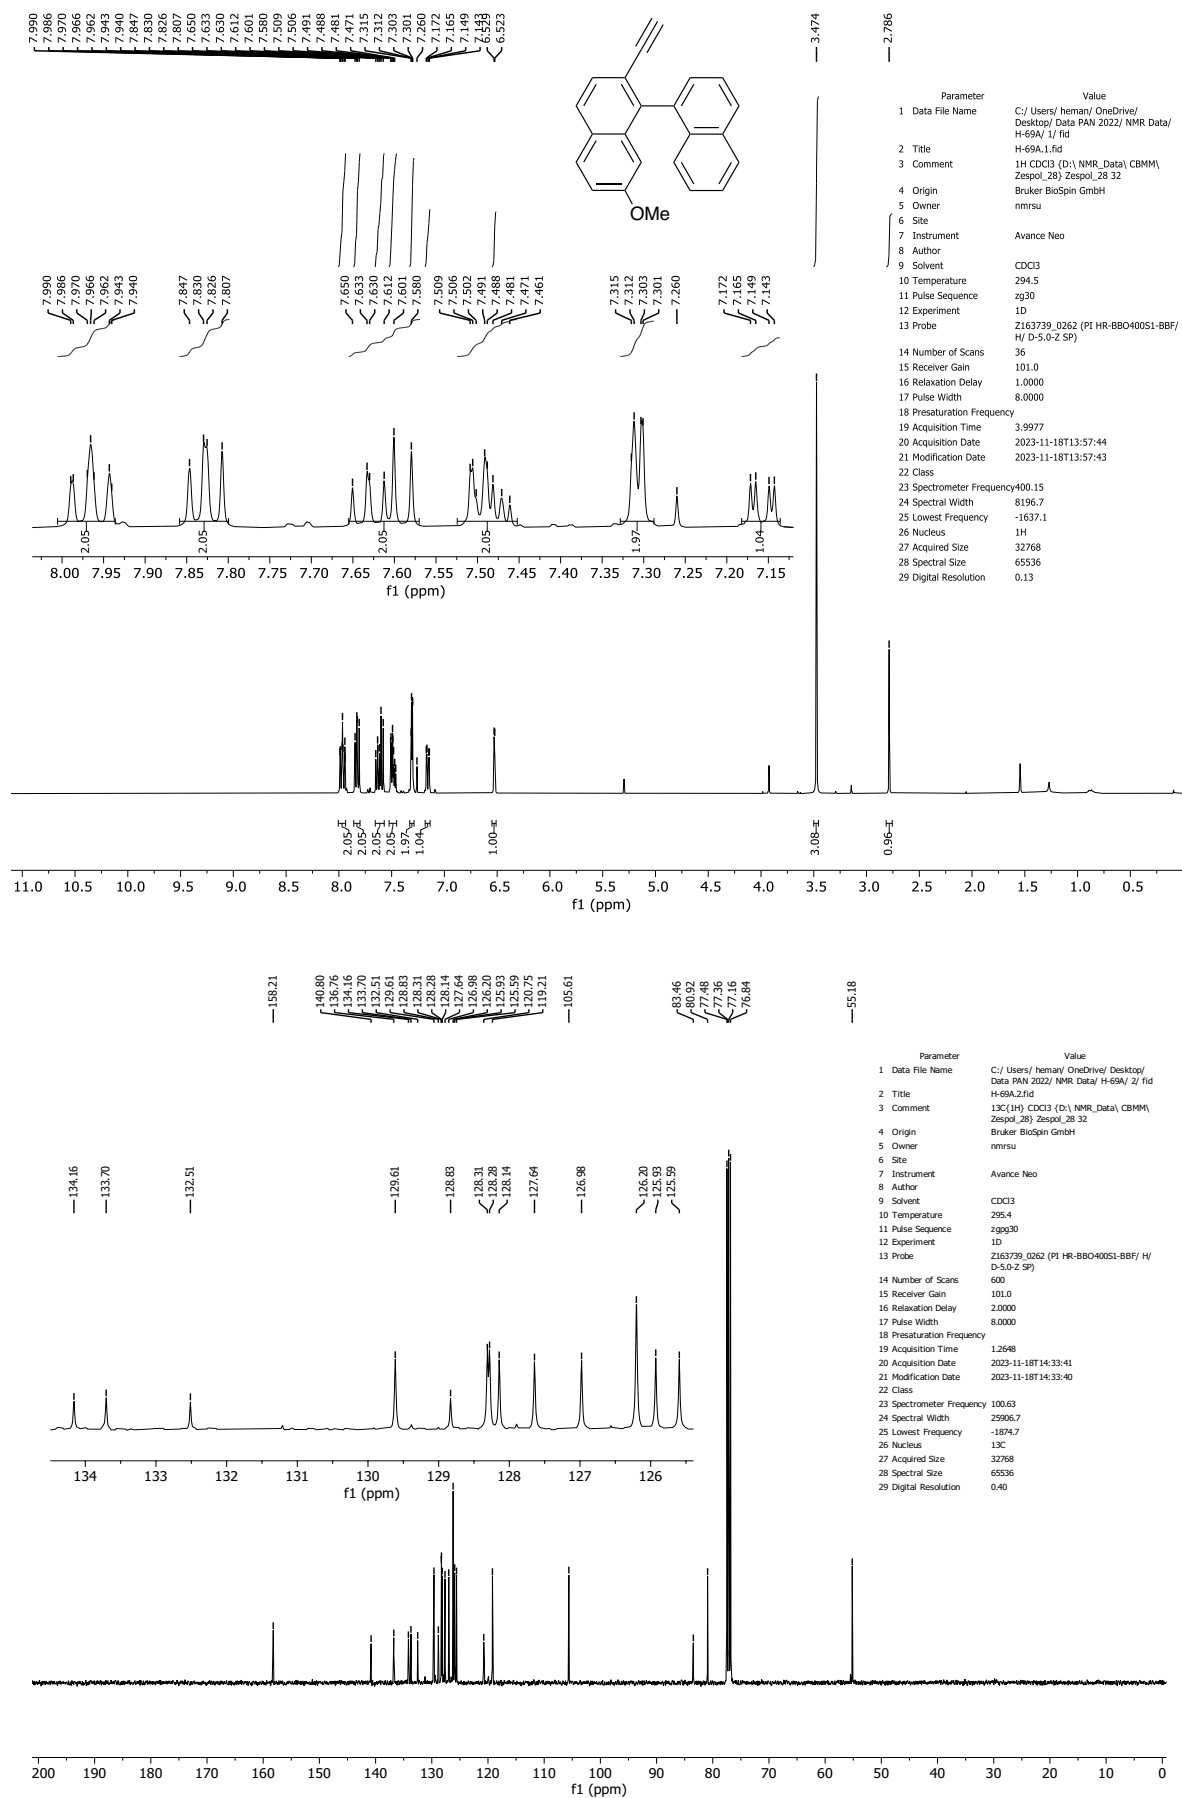

Figure S17. <sup>1</sup>H and <sup>13</sup>C{<sup>1</sup>H} NMR of **M3** recorded in CDCl<sub>3</sub> at 400 and 100 MHz, respectively.

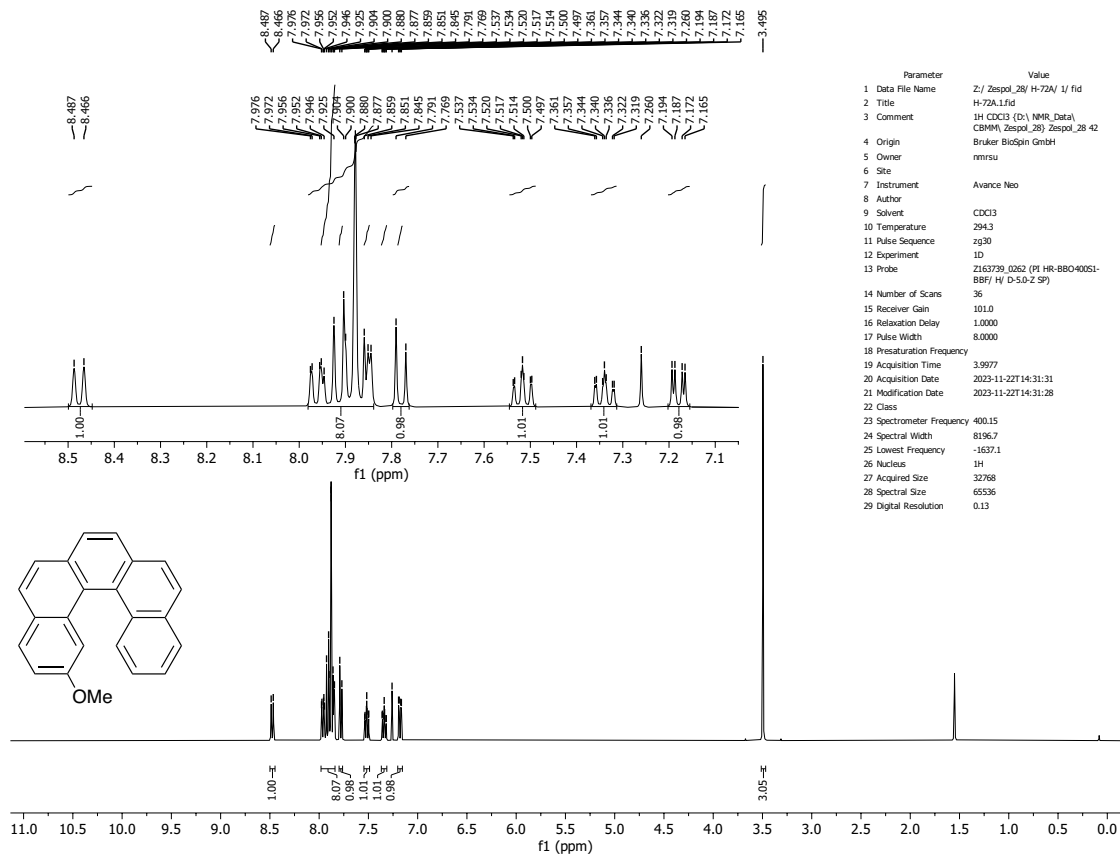

| Parameter                  | Value                                                              |
|----------------------------|--------------------------------------------------------------------|
| 1 Data File Name           | Z/ Zespol_28/ H-72A/ 1/ fid                                        |
| 2 Title                    | H-72A.1.fid                                                        |
| 3 Comment                  | 1H CDCl3 (D <sub>2</sub> ) NMR_Data/ CBMM/ Zespol_28/ Zespol_38 42 |
| 4 Origin                   | Brucker BioSpin GmbH                                               |
| 5 Owner                    | nmsru                                                              |
| 6 Site                     |                                                                    |
| 7 Instrument               | Avance Neo                                                         |
| 8 Author                   |                                                                    |
| 9 Solvent                  | CDCl3                                                              |
| 10 Temperature             | 294.3                                                              |
| 11 Pulse Sequence          | zg30                                                               |
| 12 Experiment              | 1D                                                                 |
| 13 Probe                   | Z163739_0262 (PI HR-BBO400SI-BBF/ H/ D-5.0-Z SP)                   |
| 14 Number of Scans         | 36                                                                 |
| 15 Receiver Gain           | 101.0                                                              |
| 16 Relaxation Delay        | 1.0000                                                             |
| 17 Pulse Width             | 8.0000                                                             |
| 18 Presaturation Frequency |                                                                    |
| 19 Acquisition Time        | 3.9977                                                             |
| 20 Acquisition Date        | 2023-11-22T14:31:31                                                |
| 21 Modification Date       | 2023-11-22T14:31:28                                                |
| 22 Class                   |                                                                    |
| 23 Spectrometer Frequency  | 400.15                                                             |
| 24 Spectral Width          | 8196.7                                                             |
| 25 Lowest Frequency        | 1637.1                                                             |
| 26 Nucleus                 | 1H                                                                 |
| 27 Acquired Size           | 32768                                                              |
| 28 Spectral Size           | 65536                                                              |
| 29 Digital Resolution      | 0.13                                                               |

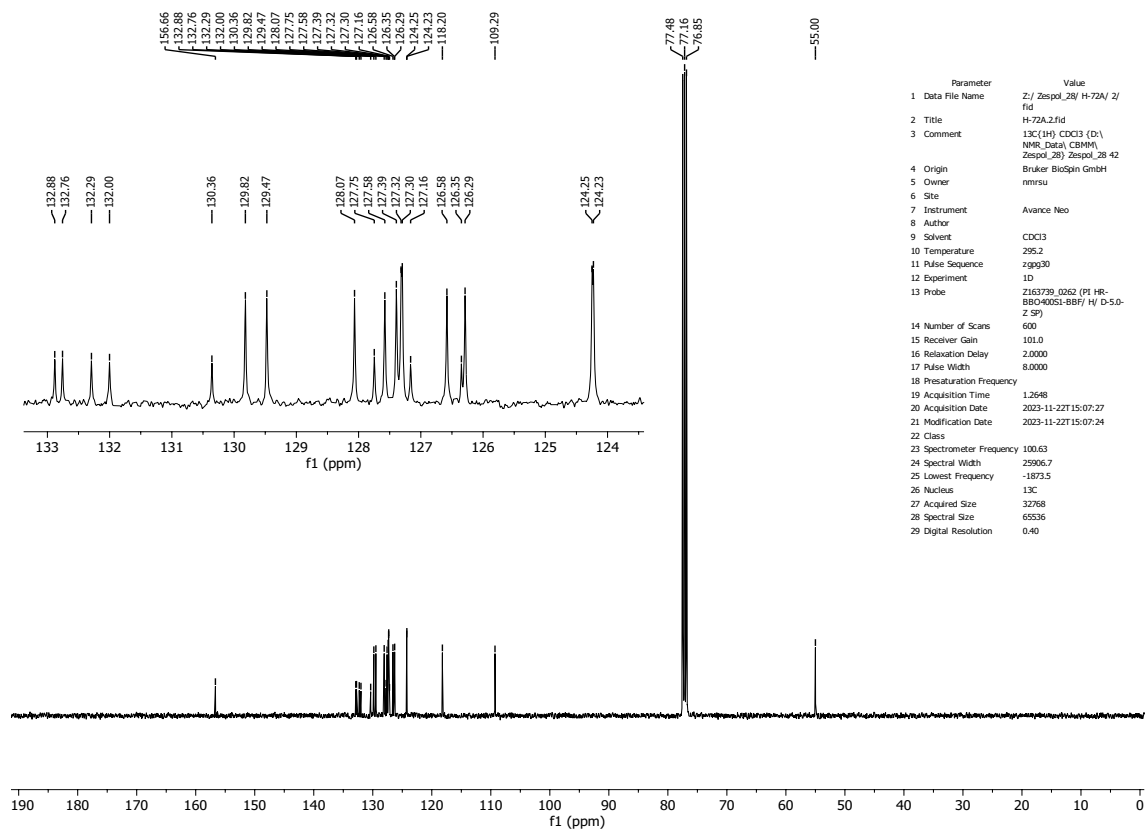

| Parameter                  | Value                                                                   |
|----------------------------|-------------------------------------------------------------------------|
| 1 Data File Name           | Z/ Zespol_28/ H-72A/ Z/ fid                                             |
| 2 Title                    | H-72A.2.fid                                                             |
| 3 Comment                  | 13C(1H) CDCl3 (D <sub>2</sub> ) NMR_Data/ CBMM/ Zespol_28/ Zespol_38 42 |
| 4 Origin                   | Brucker BioSpin GmbH                                                    |
| 5 Owner                    | nmsru                                                                   |
| 6 Site                     |                                                                         |
| 7 Instrument               | Avance Neo                                                              |
| 8 Author                   |                                                                         |
| 9 Solvent                  | CDCl3                                                                   |
| 10 Temperature             | 295.2                                                                   |
| 11 Pulse Sequence          | zgpg30                                                                  |
| 12 Experiment              | 1D                                                                      |
| 13 Probe                   | Z163739_0262 (PI HR-BBO400SI-BBF/ H/ D-5.0-Z SP)                        |
| 14 Number of Scans         | 600                                                                     |
| 15 Receiver Gain           | 101.0                                                                   |
| 16 Relaxation Delay        | 2.0000                                                                  |
| 17 Pulse Width             | 8.0000                                                                  |
| 18 Presaturation Frequency |                                                                         |
| 19 Acquisition Time        | 1.2648                                                                  |
| 20 Acquisition Date        | 2023-11-22T15:07:27                                                     |
| 21 Modification Date       | 2023-11-22T15:07:24                                                     |
| 22 Class                   |                                                                         |
| 23 Spectrometer Frequency  | 100.63                                                                  |
| 24 Spectral Width          | 25946.7                                                                 |
| 25 Lowest Frequency        | -1873.5                                                                 |
| 26 Nucleus                 | 13C                                                                     |
| 27 Acquired Size           | 32768                                                                   |
| 28 Spectral Size           | 65536                                                                   |
| 29 Digital Resolution      | 0.40                                                                    |

Figure S18. <sup>1</sup>H and <sup>13</sup>C{<sup>1</sup>H} NMR of M4 recorded in CDCl<sub>3</sub> at 400 and 100 MHz, respectively.



### 3. XRD data collection and refinement

Single-crystal XRD measurements for radicals **1[5]** and **1[7]** and precursor **3[7]** were performed with a Rigaku XtaLAB Synergy, Pilatus 300K diffractometer. The measurement was conducted at 100(2) K using the  $\text{CuK}_\alpha$  radiation ( $\lambda = 1.54184 \text{ \AA}$ ). The data was integrated using CrysAlisPro program.<sup>9</sup> Intensities for absorption were corrected using multi-scan method as in SCALE3 ABSPACK scaling algorithm implemented in CrysAlisPro program.<sup>9</sup>

CCDC: Files 2311971, 2312391, and 2339405 contain the supplementary crystallographic data for this paper. These data can be obtained free of charge from The Cambridge Crystallographic Data Centre via [www.ccdc.cam.ac.uk/structures](http://www.ccdc.cam.ac.uk/structures)

#### *Structure solution and refinement*

The structures were solved with the ShelXT<sup>10</sup> structure solution program using Intrinsic Phasing and refined in the ShelXle<sup>11</sup> by the full-matrix least-squares minimization on  $F^2$  with the ShelXL<sup>12</sup> refinement package. All non-hydrogen atoms were refined anisotropically, and C–H hydrogens were generated geometrically using the HFIX command as in ShelXL. Hydrogen atoms were refined isotropically and constrained to ride on their parent atoms. The crystal structure of helicene **1[5]** contains a solvent molecule that is disordered around two symmetry elements (3-fold rotoinversion axis and inversion center). The disorder was treated using SQUEEZE procedure<sup>13</sup> resulting in 22 electrons within a single void of a volume  $\sim 80 \text{ \AA}^3$ . It suggests the presence of an acetonitrile molecule used as the solvent for crystallization.

The crystal data and structure refinement descriptors are presented in Table S2. Molecular structures, partial packing diagrams, and a molecular overlay for radicals **1[5]** and **1[7]** and precursor **3[7]** are shown in Figures S19 – S24.

**Table S2. Selected structural data for radicals 1[5] and 1[7] and precursor 3[7]**

|                                                                                                 | 1[5]                                                               | 1[7]                                                               | 3[7]                                                               |
|-------------------------------------------------------------------------------------------------|--------------------------------------------------------------------|--------------------------------------------------------------------|--------------------------------------------------------------------|
|                                                                                                 | CCDC: 2339405                                                      | CCDC: 2312391                                                      | CCDC: 2311971                                                      |
| Formula                                                                                         | C <sub>27</sub> H <sub>16</sub> N <sub>3</sub> O                   | C <sub>35</sub> H <sub>20</sub> N <sub>3</sub> O                   | C <sub>35</sub> H <sub>21</sub> N <sub>3</sub> O                   |
| Formula Weight                                                                                  | 398.43                                                             | 498.54                                                             | 499.55                                                             |
| Crystal System                                                                                  | trigonal                                                           | monoclinic                                                         | monoclinic                                                         |
| Space Group                                                                                     | <i>R</i> $\bar{3}$                                                 | <i>P</i> 2 <sub>1</sub> / <i>c</i>                                 | <i>P</i> 2 <sub>1</sub> / <i>n</i>                                 |
| <i>a</i> /Å                                                                                     | 43.1890(5)                                                         | 21.3059(3)                                                         | 15.5452(2)                                                         |
| <i>b</i> /Å                                                                                     | 43.1890(5)                                                         | 11.4684(2)                                                         | 4.78961(6)                                                         |
| <i>c</i> /Å                                                                                     | 5.1711(3)                                                          | 9.6844(1)                                                          | 32.4950(4)                                                         |
| $\alpha$ /°                                                                                     | 90                                                                 | 90                                                                 | 90                                                                 |
| $\beta$ /°                                                                                      | 90                                                                 | 94.6850(1)                                                         | 103.488(1)                                                         |
| $\gamma$ /°                                                                                     | 120                                                                | 90                                                                 | 90                                                                 |
| Volume/Å <sup>3</sup>                                                                           | 8353.3(5)                                                          | 2358.42(6)                                                         | 2353.79(5)                                                         |
| <i>Z</i>                                                                                        | 18                                                                 | 4                                                                  | 4                                                                  |
| 2 $\theta$ range for data collection/°                                                          | 7.09 to 157.5                                                      | 8.328 to 159.37                                                    | 5.594 to 157.632                                                   |
| Index ranges                                                                                    | -54 ≤ <i>h</i> ≤ 54, -52 ≤<br><i>k</i> ≤ 53, -6 ≤ <i>l</i> ≤ 5     | -27 ≤ <i>h</i> ≤ 26, -13 ≤<br><i>k</i> ≤ 14, -12 ≤ <i>l</i> ≤ 9    | -19 ≤ <i>h</i> ≤ 18, -6 ≤ <i>k</i><br>≤ 4, -38 ≤ <i>l</i> ≤ 40     |
| No. of measured, independent, and<br>observed [ <i>I</i> > 2 $\sigma$ ( <i>I</i> )] reflections | 28218, 3920, 3106                                                  | 44352, 4960, 4557                                                  | 28677, 4812, 4426                                                  |
| <i>R</i> <sub>int</sub>                                                                         | 0.0380                                                             | 0.0387                                                             | 0.0203                                                             |
| Goodness-of-fit on <i>F</i> <sup>2</sup>                                                        | 1.029                                                              | 1.026                                                              | 1.040                                                              |
| Final <i>R</i> indexes [ <i>F</i> <sup>2</sup> > 2 $\sigma$ ( <i>F</i> <sup>2</sup> )]          | <i>R</i> <sub>1</sub> = 0.0375,<br><i>wR</i> <sub>2</sub> = 0.0947 | <i>R</i> <sub>1</sub> = 0.0383,<br><i>wR</i> <sub>2</sub> = 0.0991 | <i>R</i> <sub>1</sub> = 0.0318,<br><i>wR</i> <sub>2</sub> = 0.0830 |
| Final <i>R</i> indexes [all data]                                                               | <i>R</i> <sub>1</sub> = 0.0505,<br><i>wR</i> <sub>2</sub> = 0.1022 | <i>R</i> <sub>1</sub> = 0.0412,<br><i>wR</i> <sub>2</sub> = 0.1013 | <i>R</i> <sub>1</sub> = 0.0347,<br><i>wR</i> <sub>2</sub> = 0.0852 |
| Data/restraints/parameters                                                                      | 3920/0/280                                                         | 4960/0/352                                                         | 4812/0/353                                                         |
| Largest diff. peak/hole Å <sup>-3</sup>                                                         | 0.20/-0.18                                                         | 0.20/-0.24                                                         | 0.23/-0.18                                                         |

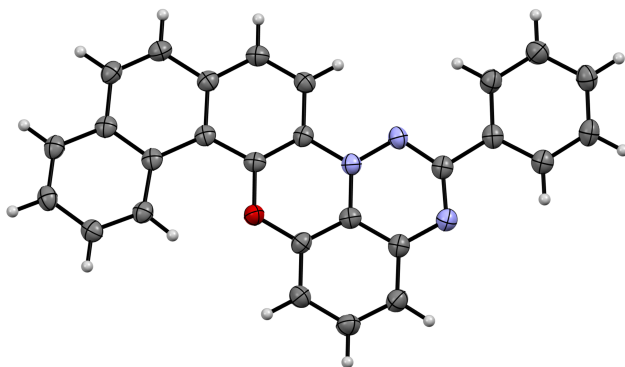**Figure S19.** Molecular structure of radical 1[5]. Displacement ellipsoids are drawn at 50% probability level.

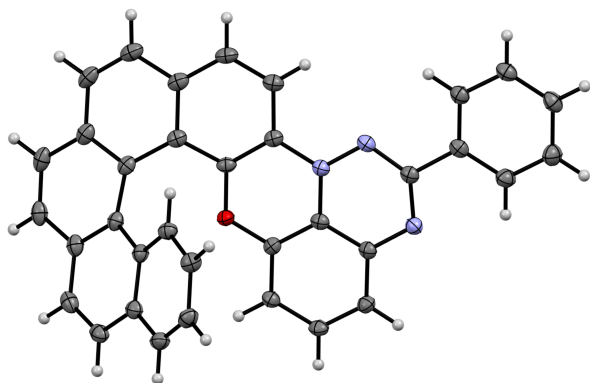

**Figure S20.** Molecular structure of radical **1[7]**. Displacement ellipsoids are drawn at 50% probability level.

The solid-state structure of precursor **3[7]** demonstrates dimensions of the heterocyclic fragment typical for this ring system.<sup>14</sup> The angle between the mean planes of the terminal benzene rings in the [5]helicene fragment in **3[7]** is  $56.6^\circ$  (Figure S21), while the analogous angle in **1[7]** is  $48.6^\circ$ . The former value compares to  $45.1^\circ$  in an *O*-methyl derivative of phenol **5[7]**.<sup>7</sup> The planes of the benzo[*e*][1,2,4]triazine and the benzenoxy ring of the carbohelicene fragment form an angle of  $46.1^\circ$ , which positions the heterocycle nearly orthogonal ( $89.9^\circ$ ) to the terminal benzene ring of the carbohelicene.

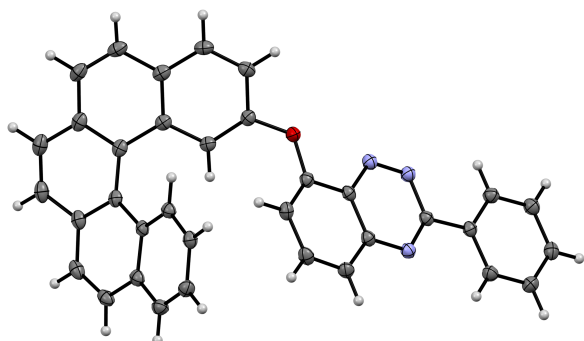

**Figure S21.** Molecular structure of precursor **3[7]**. Displacement ellipsoids are drawn at 50% probability level.

In the crystal structure of radical **1[5]** MeCN solvent molecules form channels extending along the [0 0 1] direction, around which molecules of radical **1[5]** are assembled in six stacks (Figure S22). The stacks are stabilized by  $\pi \cdots \pi$  interactions defined by C $\cdots$ C contacts of 3.295 Å (0.105 Å inside the vdW separation). Neighboring stacks around the solvent channel are associated through C–H $\cdots$ N interactions with the H $\cdots$ N distance 0.337 Å shorter than the sum of vdW radii. The phenyl rings form a hydrophobic interior of the resulting hexagonal tubes (Figure S22). The

lack of strong electrostatic interactions between radical and solvent molecules gives rise to significant positional disorder of the latter in the crystal.

The structure of helical radical **1**[7] is stabilized by C-H $\cdots$ O hydrogen bonds (with the H $\cdots$ O distance 0.256 Å inside the vdW separation) forming double chains propagating along the [0 0 1] direction. Adjacent chains are linked by C-H $\cdots$  $\pi$  interactions defined by the H $\cdots$ C distance of 2.689 Å (0.211 Å inside the VdW separation, Figure S23).

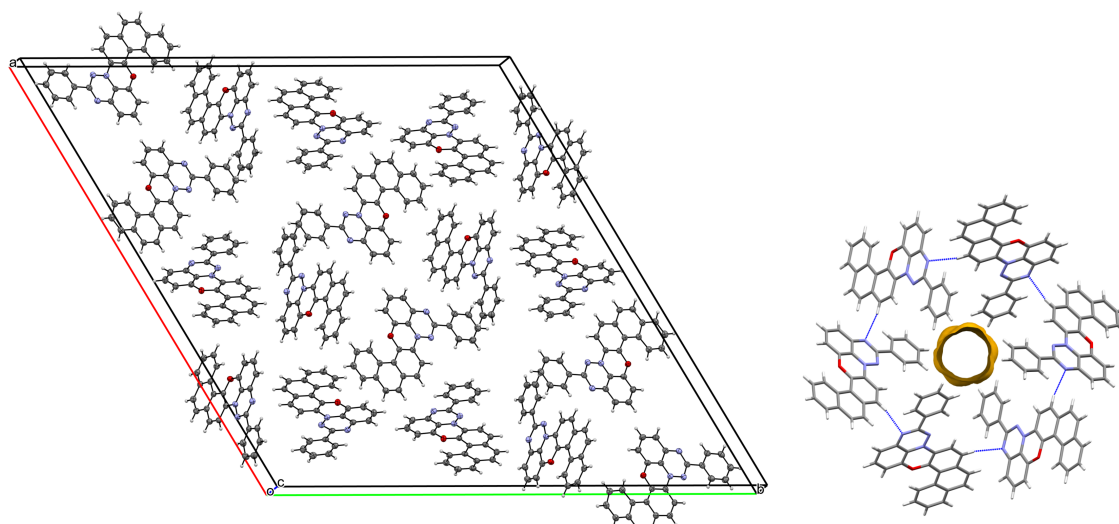

**Figure S22.** Two views of partial packing diagram of radical **1**[5].

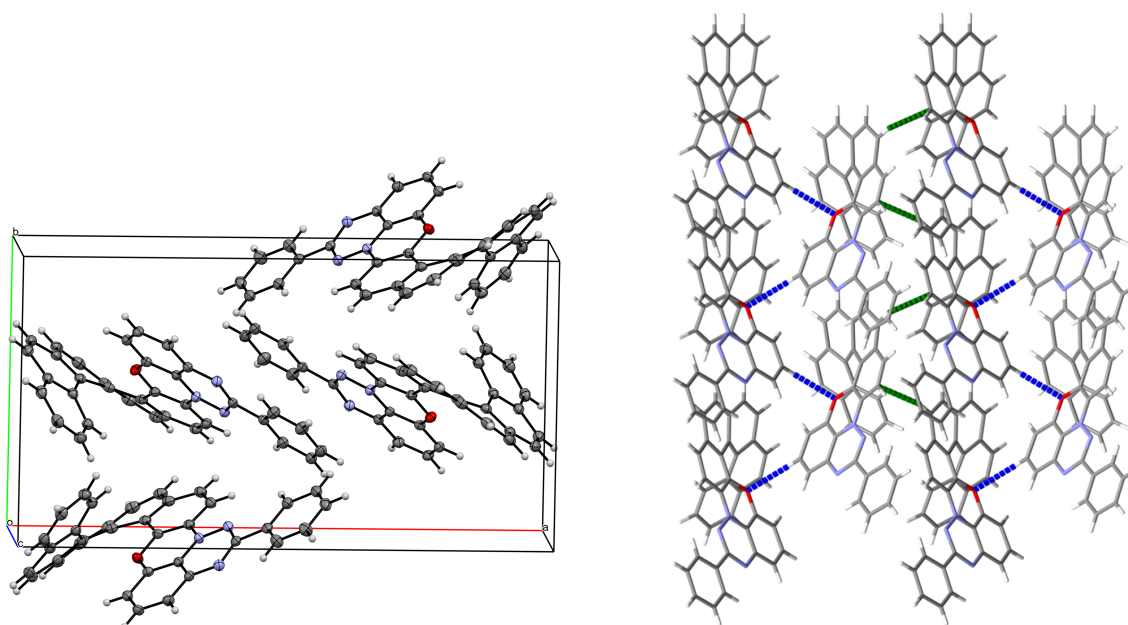

**Figure S23.** Two views of partial packing diagram of radical **1**[7].

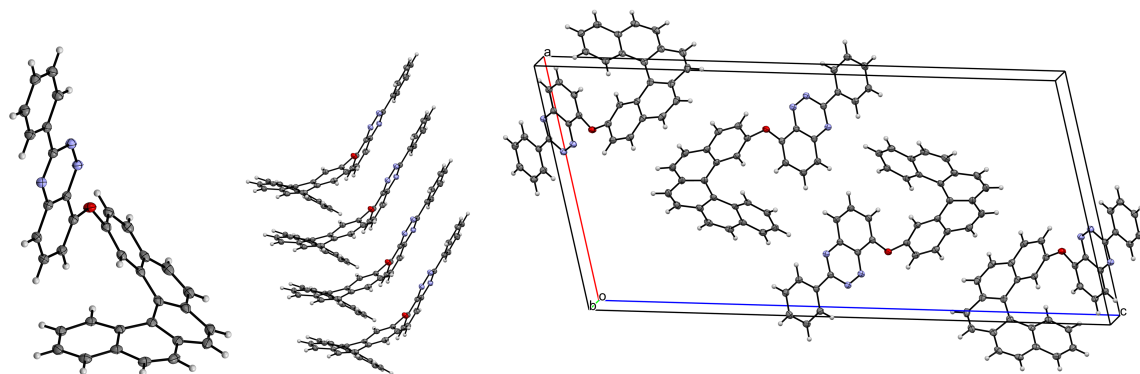

**Figure S24.** Left: XRD molecular structure of precursor **3[7]**. Middle and right: Partial crystal packing of **3[7]**. Atomic displacement ellipsoids are drawn at 50% probability level. Color code: oxygen-red, nitrogen-blue, carbon-black, hydrogen-grey.

#### 4. UV-vis spectroscopy

Electronic absorption spectra for radicals **1[n]** were recorded on a Jasco V770 spectrometer in spectroscopic grade  $\text{CH}_2\text{Cl}_2$  at concentrations in a range  $1.5\text{--}10 \times 10^{-5}$  M and fitted to the Beer–Lambert law. Results are shown in Figures S25–S27.

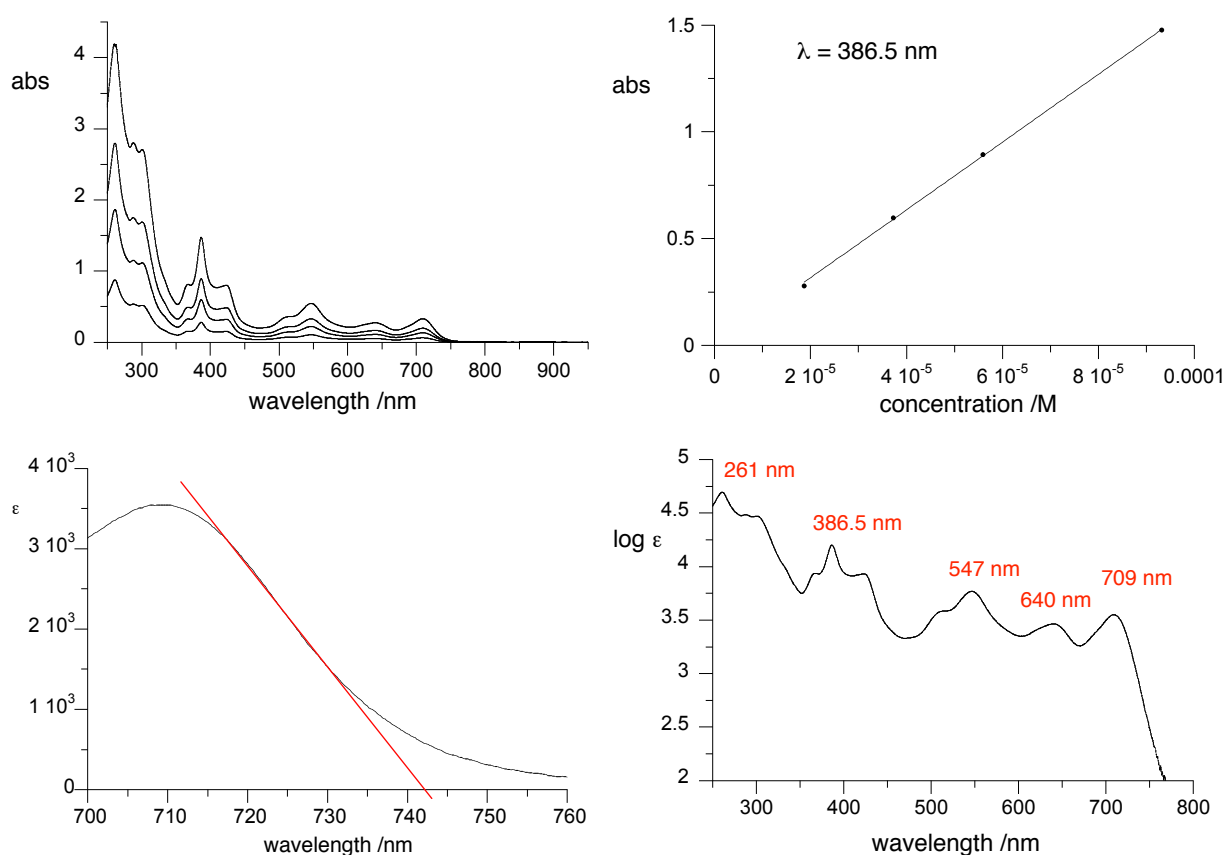

**Figure S25.** Clockwise: electronic absorption spectra for helicene **1[5]** in  $\text{CH}_2\text{Cl}_2$  for four concentrations and determination of molar extinction coefficient  $\epsilon$  at  $\lambda = 386.5$  nm (best fit function:  $\epsilon = 15,875(88) \times \text{conc}$ ,  $r^2 = 0.9996$ ), molar excitation  $\log(\epsilon)$ , and determination of onset of optical absorption.

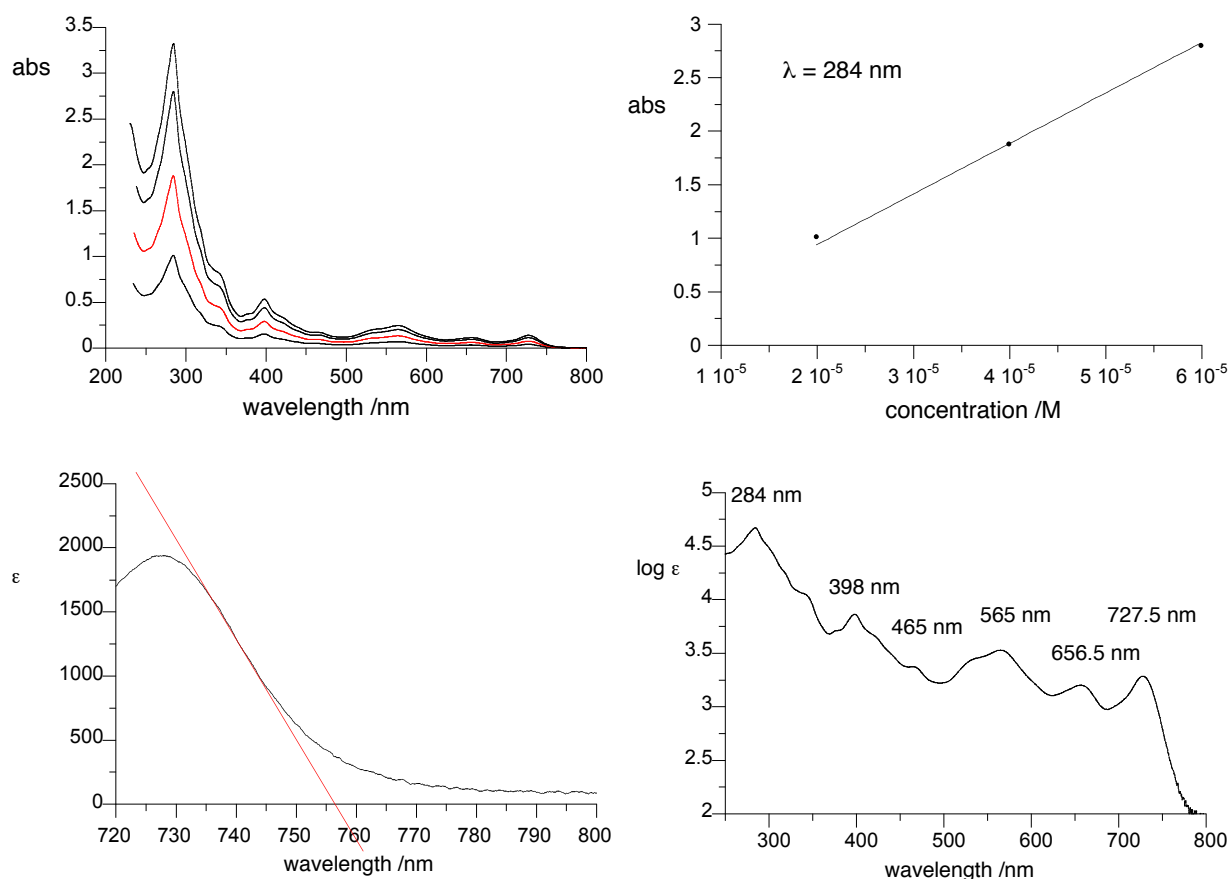

**Figure S26.** Clockwise: electronic absorption spectra for helicene **1[6]** in CH<sub>2</sub>Cl<sub>2</sub> for four concentrations and determination of molar extinction coefficient  $\epsilon$  at  $\lambda = 284$  nm (best fit function:  $\epsilon = 47,174(743) \times \text{conc}$ ,  $r^2 = 0.996$ ), and a molar excitation  $\log(\epsilon)$  plot. and determination of onset of optical absorption.

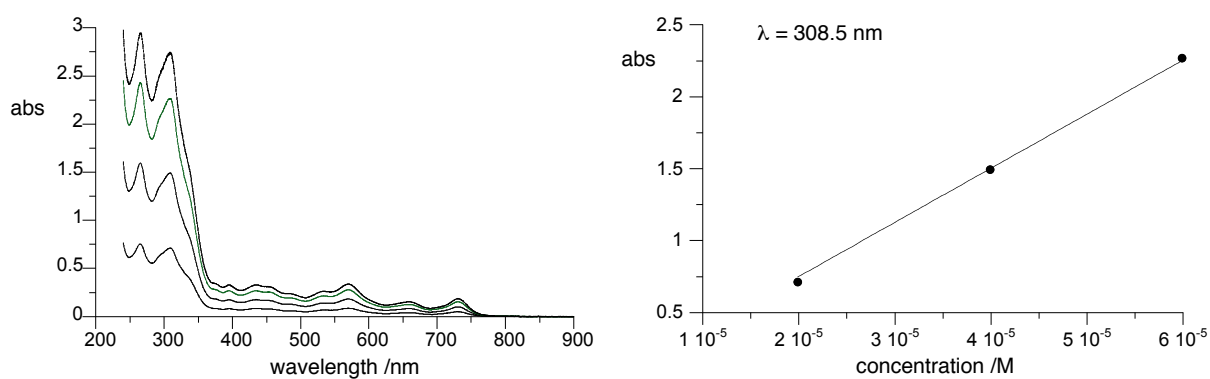

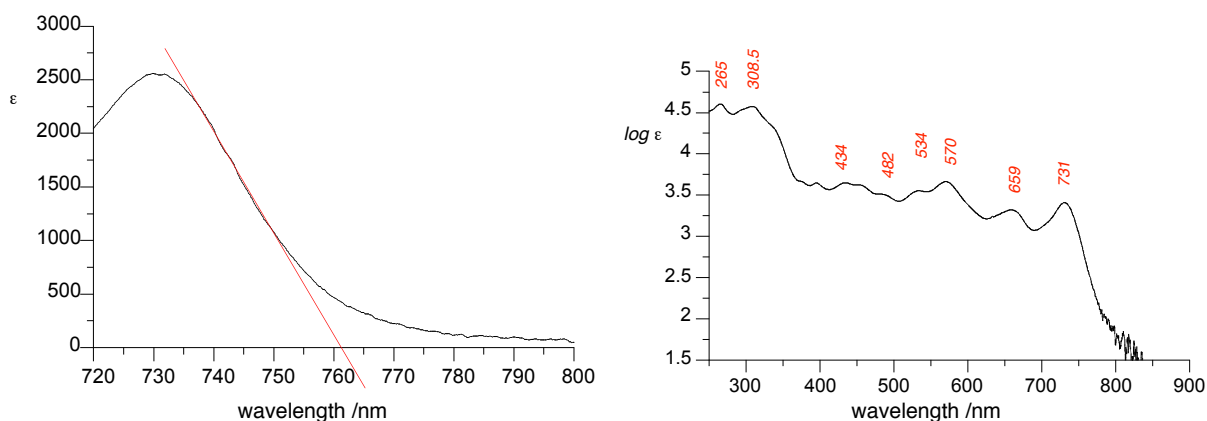

**Figure S27.** Clockwise: electronic absorption spectra for helicene **1[7]** in  $\text{CH}_2\text{Cl}_2$  for four concentrations and determination of molar extinction coefficient  $\epsilon$  at  $\lambda = 308.5$  nm (best fit function:  $\epsilon = 37.593(380) \times \text{conc}$ ,  $r^2 = 0.999$ ), molar excitation  $\log(\epsilon)$  plot, and determination of onset of optical absorption.

### 5. Chiral HPLC analysis and resolution

Chiral HPLC separation was performed using Phenomenex Lux® 5  $\mu\text{m}$  i-Amylose-3 column (250  $\times$  4.6 mm) and solvent system consisting of hexane (40%),  $\text{CH}_2\text{Cl}_2$  (58.8%) *i*-PrOH (1%) and  $\text{Et}_3\text{N}$  (0.2%). The flow rate was 0.8  $\text{mL min}^{-1}$ . Example of chromatogram is shown in Figure S28.

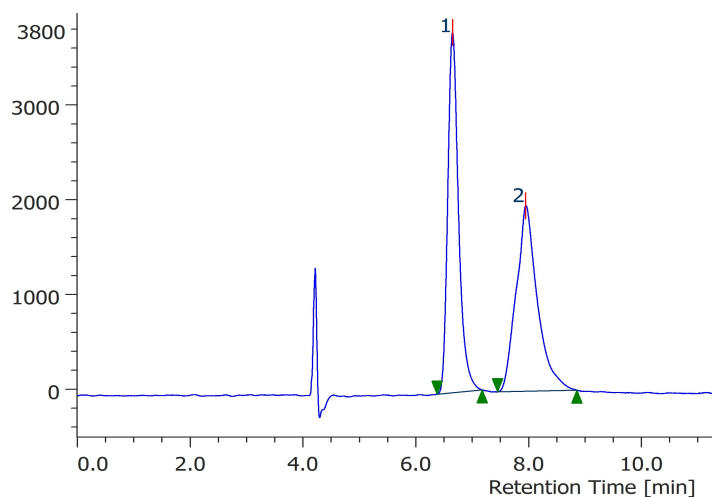

**Figure S28.** Chiral HPLC analysis of racemic radical **rac-1[7]** using Phenomenex Lux® 5  $\mu\text{m}$  i-Amylose-3 column monitored at 365 nm. Hexane/ $\text{CH}_2\text{Cl}_2$  2:3, containing *i*-PrOH and  $\text{Et}_3\text{N}$ .

## 6. Electronic circular dichroism spectroscopy

Electronic circular dichroism (ECD) spectra of enantiomers **1[7]** were recorded on Jasco J-815 CD spectrometer using solutions obtained directly from HPLC separation (hexane/CH<sub>2</sub>Cl<sub>2</sub> 2:3, containing *i*-PrOH and Et<sub>3</sub>N). Results are shown in Figure S29. The notation *first* and *second* refers to the shorter and longer retention times, respectively, of the individual enantiomers.

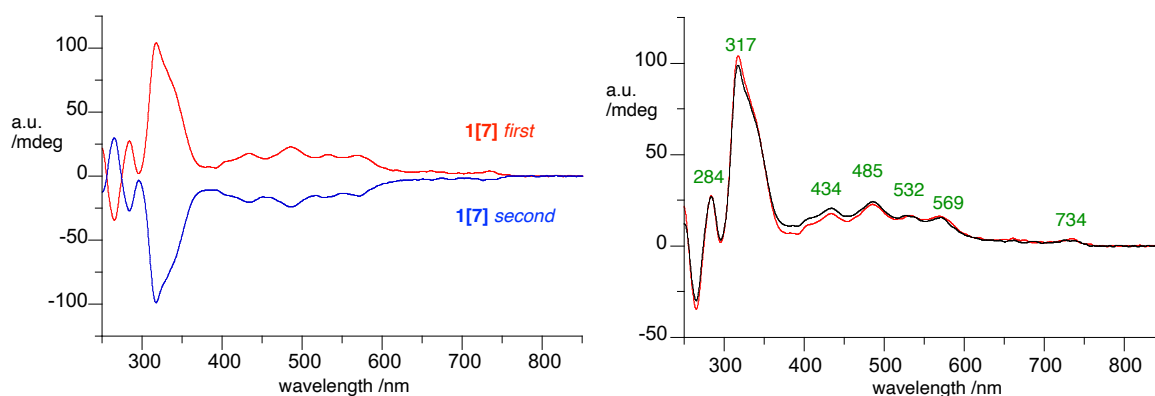

**Figure S29.** Left: Electronic circular dichroism spectra for *the first* (red) and *the second* (black) enantiomers of radical **1[7]** in hexane/CH<sub>2</sub>Cl<sub>2</sub>. Right: overlay of the two spectra with listed maxima.

## 7. Electrochemical results

Electrochemical characterization of selected radicals was conducted using a Metrohm Autolab PGSTAT128N potentiostat/galvanostat instrument. Helicene radicals **1[n]** were dissolved in dry, spectroscopic grade CH<sub>2</sub>Cl<sub>2</sub> (concentration 0.5 mM) in the presence of [*n*-Bu<sub>4</sub>N]<sup>+</sup>[PF<sub>6</sub>]<sup>-</sup> as an electrolyte (concentration 50 mM) and the resulting solution was degassed by purging with Ar gas for 20 minutes. A three-electrode electrochemical cell was used with glassy carbon disk as the working electrode ( $\phi$  2 mm, alumina polished), Pt wire as the counter electrode and Ag/AgCl wire as the pseudoreference electrode. All samples were measured without internal reference once and afterwards with Fc/Fc<sup>+</sup> (0.0 V) as the internal reference couple with a scan rate of 50 mV s<sup>-1</sup> at *ca.* 20 °C. Cyclic voltammetry (CV) measurements were started from 0.0 V in the oxidative direction and plots are shown in Figures S30–S32.



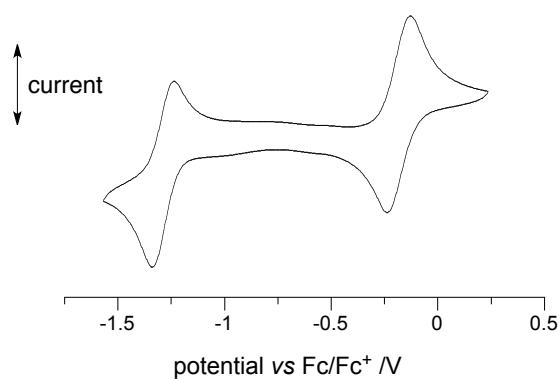

**Figure S30.** Cyclic voltammograms for helicene **1[5]** in  $\text{CH}_2\text{Cl}_2$  referenced to the  $\text{Fc}/\text{Fc}^+$  couple.

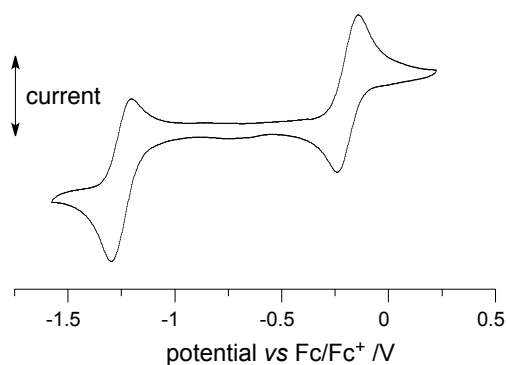

**Figure S31.** Cyclic voltammogram for helicene **1[6]** in  $\text{CH}_2\text{Cl}_2$  referenced to the  $\text{Fc}/\text{Fc}^+$  couple.

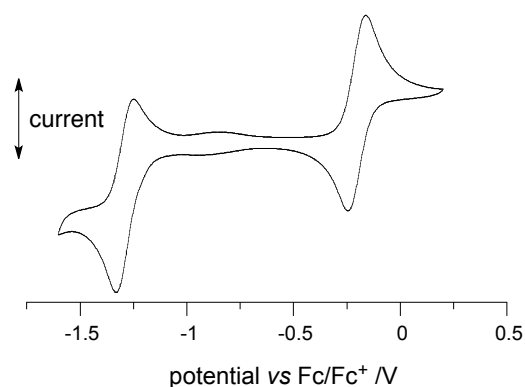

**Figure S32.** Cyclic voltammogram for helicene **1[7]** in  $\text{CH}_2\text{Cl}_2$  referenced to the  $\text{Fc}/\text{Fc}^+$  couple.

## 8. EPR spectroscopy

EPR spectra for helicene-type radicals **1[n]** were recorded on a X-band EMX-Nano EPR spectrometer at room temperature on diluted and degassed solutions in benzene. The microwave power was in a range 3-12 mW (established with the Power Sweep program below the saturation of the signal) with a modulation frequency of 100 kHz, modulation amplitude of

0.5 G<sub>pp</sub> and spectral width of 100 G. Accurate *g*-values were obtained using TEMPO as EMX-Nano internal standard.

Simulations of the spectra were performed with *Easy Spin* (Matlab) using DFT results (*vide infra*) as the starting point including all nitrogen atoms and up to 8 hydrogen atoms. The resulting *hfcc* values were perturbed several times until a global minimum for the fit was achieved. For the purpose of consistency, original spectra<sup>3, 15</sup> for **1[3]** and **1[4]** were resimulated. Experimental and simulated spectra are shown in Figures S33–S35 and resulting *hfcc* are listed in Table S3.

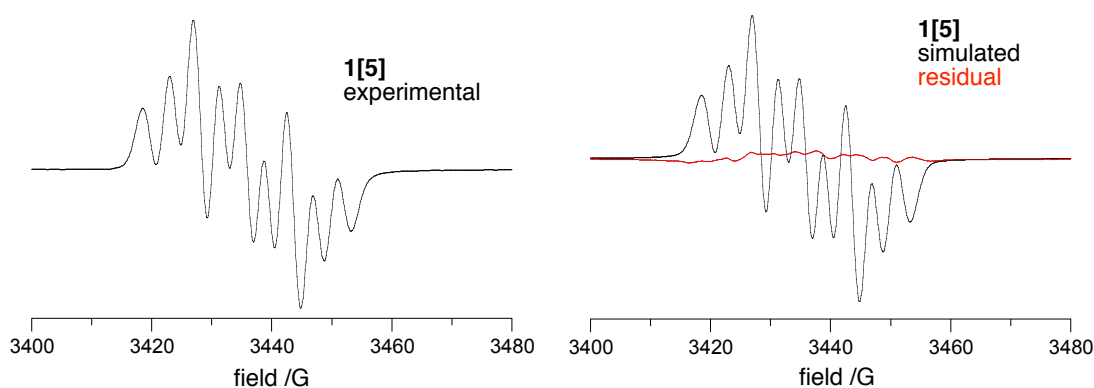

**Figure S33.** Experimental, simulated and difference spectra for helicene **1[5]** in benzene.

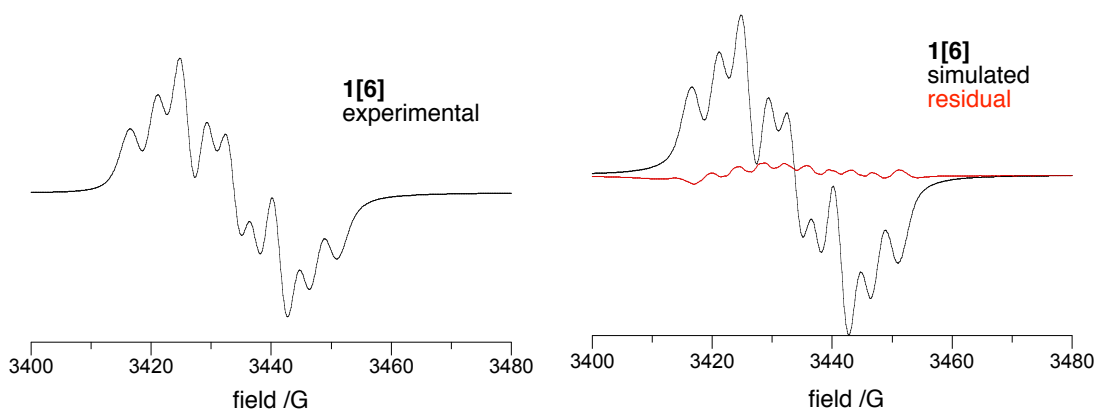

**Figure S34.** Experimental, simulated and difference spectra for helicene **1[6]** in benzene.

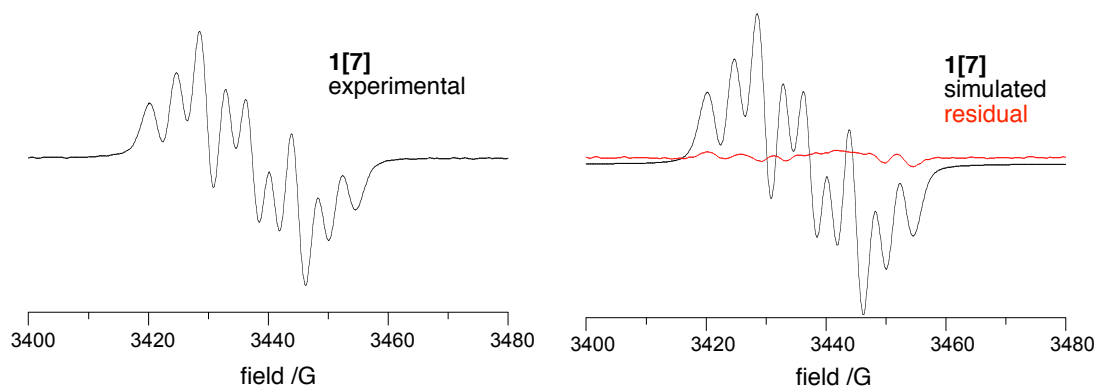

**Figure S35.** Experimental, simulated and difference spectra for helicene **1[7]** in benzene.

**Table S3.** Hyperfine coupling constants (G) for helicenes **1[n]**.

| <i>hfcc</i><br>/G     | <b>1[3]</b> | <b>1[4]</b> | <b>1[5]</b> | <b>1[6]</b> | <b>1[7]</b> |
|-----------------------|-------------|-------------|-------------|-------------|-------------|
| <i>a</i> <sub>N</sub> | 7.52        | 7.60        | 7.50        | 7.38        | 7.36        |
| <i>a</i> <sub>N</sub> | 4.35        | 4.16        | 4.09        | 4.06        | 4.05        |
| <i>a</i> <sub>N</sub> | 4.35        | 4.20        | 4.30        | 4.28        | 4.26        |
| <i>a</i> <sub>H</sub> | 0.93        | 0.96        | 1.36        | 0.83        | 0.65        |
| <i>a</i> <sub>H</sub> | 0.60        | 0.99        | 0.70        | 0.87        | 0.66        |
| <i>a</i> <sub>H</sub> | 1.94        | 0.84        | 0.88        | 0.78        | 1.06        |
| <i>a</i> <sub>H</sub> | 0.45        | 0.39        | 1.29        | 1.15        | 0.41        |
| <i>a</i> <sub>H</sub> | 0.70        | 0.51        | 0.97        | 0.46        | 0.34        |
| <i>a</i> <sub>H</sub> | 0.43        | -0.52       | 0.00        | 0.51        | 0.35        |
| <i>a</i> <sub>H</sub> | 0.33        | 0.36        | 0.38        | 0.42        | 0.44        |
| <i>a</i> <sub>H</sub> | 0.35        | 0.29        | 0.01        | 0.34        | 0.29        |
| <i>g</i>              | 2.0026      | 2.0028      | 2.0041      | 2.0053      | 2.0032      |

<sup>a</sup> Referenced to TEMPO as the internal standard.

## 9. Computational details

### *a) geometry optimization and energies for radicals 1[n]*

Quantum-mechanical calculations were carried out using Gaussian 16 suite of programs.<sup>16</sup> Geometry optimizations of radicals **1[n]** were undertaken at the UB3LYP/6-311G(d,p) level of theory in CH<sub>2</sub>Cl<sub>2</sub> dielectric medium (PCM model<sup>17</sup>) requested with the SCRF(Solvent=CH<sub>2</sub>Cl<sub>2</sub>) keyword and using tight convergence limits. The nature of the stationary points was verified with frequency calculations.

### *b) spin delocalization in radicals 1[n]*

Spin delocalization parameter RDV (Radical Delocalization Value) was calculated for radicals **1[n]** according to the formula:<sup>18</sup>

$$RDV = \sum_{i=1}^n (\rho_i)^2$$

where spin concentration  $\rho_i$  on each heavy atoms  $i$  (hydrogen atoms summed up to heavy atoms) is obtained with the UCAM-B3LYP/EPR-II // UB3LYP/6-311G(d,p) method in benzene dielectric medium using the PCM model<sup>17</sup> [keyword: SCRF(Solvent=benzene)].

For the purpose of this work, the inverse is reported:  $RDV^{-1}=1/RDV$ , since now larger values correspond to greater delocalization.

### c) electronic excitation data for radicals **1[n]**

Electronic excitation energies in CH<sub>2</sub>Cl<sub>2</sub> dielectric medium were obtained for radicals **1[n]** at the UB3LYP/6-311G(d,p) // UB3LYP/6-311G(d,p) level of theory using time-dependent DFT method<sup>19</sup> supplied in the Gaussian 16 package.<sup>16</sup> Dielectric medium for calculations was implemented by the PCM model<sup>17</sup> using the SCRF(solvent=CH2Cl2) keyword. Partial output data are shown below.

Calculation indicated that the lowest energy absorption band consist of two close energy excitations. Therefore, for the purpose of comparison with the experimental spectra the position of the lowest energy absorption band was determined as a peak of a composite band obtained in Gauss View software using half-width half-height of 60 meV. A comparison of the experimental and TD-DFT derived lowest energy absorption band is shown in Figure S36.

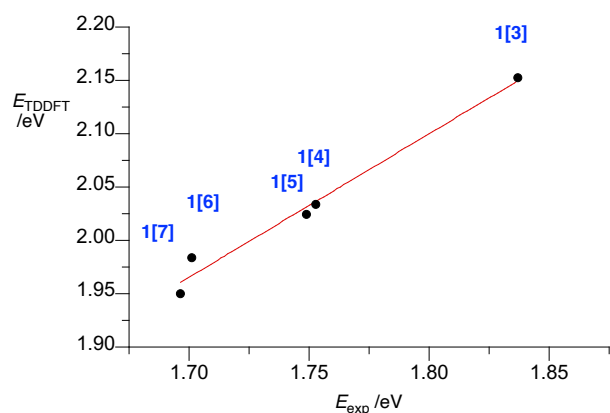

**Figure S36.** A correlation of experimental and TD-DFT derived energy of the lowest absorption band for radicals **1[n]**. Best fit function:  $E_{\text{TDDFT}} = 1.334(11) \times E_{\text{exp}} - 0.3(2)$ ,  $r^2 = 0.980$ .

### d) partial output from TD-DFT calculation for radicals **1[n]**

UB3LYP/6-311G(d,p) // UB3LYP/6-311G(d,p) TD(NStates=90) in CH2Cl2

#### **1[3]**

```
Excited State 1: 2.045-A' 2.0272 eV 611.60 nm f=0.0030 <S**2>=0.796
 78A -> 79A 0.96004
 76B -> 78B -0.11108
 77B -> 78B -0.14197
```

This state for optimization and/or second-order correction.

Total Energy, E(TD-HF/TD-DFT) = -970.854411652  
 Copying the excited state density for this state as the 1-particle RhoCI density.

|               |    |           |           |           |          |              |
|---------------|----|-----------|-----------|-----------|----------|--------------|
| Excited State | 2: | 2.087-A'  | 2.1535 eV | 575.73 nm | f=0.0511 | <S**2>=0.838 |
| 78A -> 79A    |    | 0.13351   |           |           |          |              |
| 78A -> 80A    |    | -0.10957  |           |           |          |              |
| 77B -> 78B    |    | 0.96336   |           |           |          |              |
| Excited State | 3: | 2.198-A'  | 2.7448 eV | 451.71 nm | f=0.0417 | <S**2>=0.958 |
| 77A -> 80A    |    | 0.13162   |           |           |          |              |
| 78A -> 80A    |    | 0.94342   |           |           |          |              |
| 72B -> 78B    |    | 0.13039   |           |           |          |              |
| 77B -> 80B    |    | -0.10603  |           |           |          |              |
| Excited State | 4: | 2.048-A'' | 2.9615 eV | 418.65 nm | f=0.0011 | <S**2>=0.799 |
| 73B -> 78B    |    | 0.98755   |           |           |          |              |
| Excited State | 5: | 2.484-A'  | 3.1496 eV | 393.66 nm | f=0.0353 | <S**2>=1.293 |
| 75A -> 82A    |    | 0.10333   |           |           |          |              |
| 76A -> 79A    |    | 0.14687   |           |           |          |              |
| 77A -> 79A    |    | 0.32426   |           |           |          |              |
| 78A -> 79A    |    | 0.12618   |           |           |          |              |
| 76B -> 78B    |    | 0.84595   |           |           |          |              |
| 76B -> 79B    |    | 0.14736   |           |           |          |              |
| 77B -> 79B    |    | 0.20627   |           |           |          |              |

#### 1[4]

|               |    |          |           |           |          |              |
|---------------|----|----------|-----------|-----------|----------|--------------|
| Excited State | 1: | 2.091-A' | 1.9573 eV | 633.46 nm | f=0.0102 | <S**2>=0.844 |
| 90A -> 93A    |    | -0.10158 |           |           |          |              |
| 91A -> 92A    |    | 0.89868  |           |           |          |              |
| 91A -> 93A    |    | 0.11461  |           |           |          |              |
| 91A -> 94A    |    | 0.10436  |           |           |          |              |
| 90B -> 91B    |    | 0.33227  |           |           |          |              |

This state for optimization and/or second-order correction.

Total Energy, E(TD-HF/TD-DFT) = -1124.53396741  
 Copying the excited state density for this state as the 1-particle RhoCI density.

|               |    |          |           |           |          |              |
|---------------|----|----------|-----------|-----------|----------|--------------|
| Excited State | 2: | 2.109-A' | 2.0425 eV | 607.02 nm | f=0.0285 | <S**2>=0.862 |
| 91A -> 92A    |    | -0.23695 |           |           |          |              |
| 91A -> 93A    |    | -0.46992 |           |           |          |              |
| 90B -> 91B    |    | 0.81734  |           |           |          |              |
| Excited State | 3: | 2.257-A' | 2.2712 eV | 545.89 nm | f=0.0937 | <S**2>=1.023 |
| 90A -> 92A    |    | -0.14299 |           |           |          |              |
| 90A -> 93A    |    | 0.11947  |           |           |          |              |
| 91A -> 92A    |    | -0.21552 |           |           |          |              |
| 91A -> 93A    |    | 0.80266  |           |           |          |              |
| 89B -> 91B    |    | -0.11408 |           |           |          |              |
| 90B -> 91B    |    | 0.41020  |           |           |          |              |
| 90B -> 92B    |    | 0.13301  |           |           |          |              |
| 90B -> 93B    |    | -0.11709 |           |           |          |              |
| Excited State | 4: | 3.141-A' | 2.8762 eV | 431.07 nm | f=0.0212 | <S**2>=2.217 |
| 89A -> 92A    |    | -0.18509 |           |           |          |              |
| 89A -> 93A    |    | 0.17285  |           |           |          |              |
| 90A -> 92A    |    | -0.33349 |           |           |          |              |
| 90A -> 93A    |    | 0.33332  |           |           |          |              |
| 91A -> 92A    |    | 0.17150  |           |           |          |              |

|               |              |           |           |          |              |  |  |
|---------------|--------------|-----------|-----------|----------|--------------|--|--|
| 91A -> 93A    | -0.28049     |           |           |          |              |  |  |
| 91A -> 94A    | 0.13196      |           |           |          |              |  |  |
| 91A -> 96A    | -0.14134     |           |           |          |              |  |  |
| 86B -> 91B    | -0.14191     |           |           |          |              |  |  |
| 89B -> 91B    | -0.22163     |           |           |          |              |  |  |
| 89B -> 92B    | 0.21382      |           |           |          |              |  |  |
| 89B -> 93B    | -0.16354     |           |           |          |              |  |  |
| 89B -> 94B    | 0.10548      |           |           |          |              |  |  |
| 90B -> 92B    | 0.41900      |           |           |          |              |  |  |
| 90B -> 93B    | -0.38455     |           |           |          |              |  |  |
| Excited State | 5: 2.401-A'  | 2.9713 eV | 417.28 nm | f=0.0221 | <S**2>=1.191 |  |  |
| 89A -> 93A    | 0.10622      |           |           |          |              |  |  |
| 90A -> 92A    | -0.20357     |           |           |          |              |  |  |
| 90A -> 93A    | -0.12328     |           |           |          |              |  |  |
| 91A -> 92A    | -0.14216     |           |           |          |              |  |  |
| 91A -> 94A    | 0.39300      |           |           |          |              |  |  |
| 89B -> 91B    | 0.78116      |           |           |          |              |  |  |
| 90B -> 91B    | 0.12895      |           |           |          |              |  |  |
| 90B -> 92B    | 0.22060      |           |           |          |              |  |  |
| 90B -> 94B    | 0.10108      |           |           |          |              |  |  |
| Excited State | 6: 2.050-A'' | 2.9978 eV | 413.59 nm | f=0.0011 | <S**2>=0.801 |  |  |
| 85B -> 91B    | 0.98622      |           |           |          |              |  |  |
| Excited State | 7: 2.150-A'  | 3.0012 eV | 413.11 nm | f=0.0487 | <S**2>=0.905 |  |  |
| 91A -> 94A    | 0.84325      |           |           |          |              |  |  |
| 86B -> 91B    | 0.18543      |           |           |          |              |  |  |
| 89B -> 91B    | -0.40085     |           |           |          |              |  |  |

### 1[5]

|               |             |           |           |          |              |  |  |
|---------------|-------------|-----------|-----------|----------|--------------|--|--|
| Excited State | 1: 2.056-A' | 1.9878 eV | 623.74 nm | f=0.0134 | <S**2>=0.807 |  |  |
| 104A ->105A   | 0.93318     |           |           |          |              |  |  |
| 104A ->107A   | -0.13660    |           |           |          |              |  |  |
| 103B ->104B   | 0.20658     |           |           |          |              |  |  |

This state for optimization and/or second-order correction.

Total Energy, E(TD-HF/TD-DFT) = -1278.20610030

Copying the excited state density for this state as the 1-particle RhoCI density.

|               |             |           |           |          |              |  |  |
|---------------|-------------|-----------|-----------|----------|--------------|--|--|
| Excited State | 2: 2.123-A' | 2.0313 eV | 610.36 nm | f=0.0506 | <S**2>=0.877 |  |  |
| 104A ->105A   | -0.21413    |           |           |          |              |  |  |
| 104A ->106A   | -0.30647    |           |           |          |              |  |  |
| 103B ->104B   | 0.89603     |           |           |          |              |  |  |

|               |             |           |           |          |              |  |  |
|---------------|-------------|-----------|-----------|----------|--------------|--|--|
| Excited State | 3: 2.299-A' | 2.3096 eV | 536.82 nm | f=0.1197 | <S**2>=1.071 |  |  |
| 103A ->106A   | -0.16697    |           |           |          |              |  |  |
| 104A ->106A   | 0.85199     |           |           |          |              |  |  |
| 104A ->108A   | 0.12053     |           |           |          |              |  |  |
| 102B ->104B   | 0.18689     |           |           |          |              |  |  |
| 103B ->104B   | 0.29731     |           |           |          |              |  |  |
| 103B ->106B   | -0.17047    |           |           |          |              |  |  |

|               |             |           |           |          |              |  |  |
|---------------|-------------|-----------|-----------|----------|--------------|--|--|
| Excited State | 4: 2.300-A' | 2.5982 eV | 477.19 nm | f=0.0012 | <S**2>=1.072 |  |  |
| 102A ->107A   | -0.10412    |           |           |          |              |  |  |
| 103A ->106A   | -0.11645    |           |           |          |              |  |  |
| 104A ->105A   | 0.13692     |           |           |          |              |  |  |
| 104A ->106A   | -0.12915    |           |           |          |              |  |  |
| 104A ->107A   | 0.73772     |           |           |          |              |  |  |
| 102B ->104B   | 0.54991     |           |           |          |              |  |  |

102B ->106B 0.10739  
 102B ->107B 0.10243  
 103B ->106B -0.10610

Excited State 5: 2.388-A' 2.8388 eV 436.75 nm f=0.1787 <S\*\*2>=1.176

102A ->106A 0.12991  
 102A ->107A 0.12326  
 103A ->106A 0.14724  
 104A ->106A 0.26457  
 104A ->107A 0.58438  
 104A ->108A 0.21153  
 101B ->106B 0.10700  
 102B ->104B -0.56483  
 102B ->107B -0.10890  
 103B ->105B -0.10571  
 103B ->106B 0.24387

Excited State 6: 2.253-A' 2.9424 eV 421.37 nm f=0.0262 <S\*\*2>=1.018

103A ->105A 0.10353  
 103A ->106A 0.14689  
 104A ->108A 0.13880  
 101B ->104B 0.90236  
 102B ->104B 0.15060  
 103B ->104B 0.10831  
 103B ->105B 0.13800  
 103B ->106B 0.10437

**1[6]**

Excited State 1: 2.177-A 1.9187 eV 646.19 nm f=0.0115 <S\*\*2>=0.935

116A ->118A 0.10413  
 117A ->118A 0.72309  
 117A ->119A -0.21872  
 117A ->120A 0.20979  
 117A ->121A 0.10240  
 116B ->117B -0.54960  
 116B ->118B -0.11497

This state for optimization and/or second-order correction.

Total Energy, E(TD-HF/TD-DFT) = -1431.87300351

Copying the excited state density for this state as the 1-particle RhoCI density.

Excited State 2: 2.090-A 2.0059 eV 618.10 nm f=0.0169 <S\*\*2>=0.842

117A ->118A -0.27031  
 117A ->119A 0.64563  
 117A ->120A -0.12339  
 115B ->117B -0.16370  
 116B ->117B -0.63976

Excited State 3: 2.221-A 2.1741 eV 570.27 nm f=0.1216 <S\*\*2>=0.983

116A ->118A 0.17350  
 117A ->118A 0.48555  
 117A ->119A 0.64656  
 114B ->117B 0.14381  
 115B ->117B 0.11946  
 116B ->117B 0.43777  
 116B ->118B -0.15780

Excited State 4: 2.515-A 2.4839 eV 499.15 nm f=0.0062 <S\*\*2>=1.331

115A ->120A 0.14835  
 116A ->118A 0.22921  
 117A ->118A -0.29549

|             |          |
|-------------|----------|
| 117A ->120A | 0.67178  |
| 114B ->117B | 0.30218  |
| 115B ->117B | -0.28985 |
| 115B ->118B | 0.13323  |
| 115B ->120B | -0.15328 |
| 116B ->118B | -0.21392 |

Excited State 5: 2.600-A 2.5434 eV 487.47 nm f=0.0140 <S\*\*2>=1.440

|             |          |
|-------------|----------|
| 115A ->118A | -0.11099 |
| 116A ->118A | 0.30848  |
| 117A ->118A | -0.17477 |
| 117A ->119A | -0.14012 |
| 117A ->120A | -0.21531 |
| 117A ->121A | -0.10472 |
| 114B ->117B | 0.22267  |
| 115B ->117B | 0.69493  |
| 115B ->118B | 0.23762  |
| 116B ->117B | -0.18226 |
| 116B ->118B | -0.27536 |

Excited State 6: 2.576-A 2.6369 eV 470.19 nm f=0.0527 <S\*\*2>=1.409

|             |          |
|-------------|----------|
| 115A ->118A | 0.10111  |
| 115A ->120A | -0.11764 |
| 116A ->118A | -0.26563 |
| 116A ->120A | 0.13130  |
| 117A ->119A | 0.20472  |
| 117A ->120A | 0.53878  |
| 115B ->117B | 0.54119  |
| 115B ->118B | -0.17233 |
| 115B ->120B | 0.10563  |
| 116B ->117B | -0.13743 |
| 116B ->118B | 0.32659  |

Excited State 7: 2.323-A 2.8488 eV 435.22 nm f=0.1067 <S\*\*2>=1.099

|             |          |
|-------------|----------|
| 115A ->118A | 0.15610  |
| 116A ->118A | -0.23349 |
| 117A ->120A | -0.26296 |
| 117A ->121A | -0.14115 |
| 114B ->117B | 0.83290  |
| 115B ->117B | -0.17261 |
| 115B ->118B | -0.15775 |
| 116B ->117B | -0.10572 |

**1[7]**

Excited State 1: 2.176-A 1.9153 eV 647.34 nm f=0.0139 <S\*\*2>=0.933

|             |          |
|-------------|----------|
| 130A ->131A | 0.72456  |
| 130A ->133A | -0.30593 |
| 130A ->134A | 0.15903  |
| 129B ->130B | -0.52445 |
| 129B ->131B | -0.10275 |

This state for optimization and/or second-order correction.

Total Energy, E(TD-HF/TD-DFT) = -1585.54351062

Copying the excited state density for this state as the 1-particle RhoCI density.

Excited State 2: 2.109-A 1.9899 eV 623.06 nm f=0.0129 <S\*\*2>=0.862

|             |          |
|-------------|----------|
| 130A ->131A | 0.28960  |
| 130A ->132A | 0.43680  |
| 130A ->133A | -0.46166 |
| 127B ->130B | 0.16147  |
| 128B ->130B | -0.10483 |



|                  |          |           |           |          |              |  |
|------------------|----------|-----------|-----------|----------|--------------|--|
| 129B ->130B      | 0.64768  |           |           |          |              |  |
| Excited State 3: | 2.244-A  | 2.1614 eV | 573.64 nm | f=0.1237 | <S**2>=1.009 |  |
| 129A ->131A      | 0.15579  |           |           |          |              |  |
| 130A ->131A      | -0.44064 |           |           |          |              |  |
| 130A ->132A      | 0.52375  |           |           |          |              |  |
| 130A ->133A      | -0.40427 |           |           |          |              |  |
| 130A ->134A      | -0.11597 |           |           |          |              |  |
| 125B ->130B      | 0.10372  |           |           |          |              |  |
| 127B ->130B      | -0.13147 |           |           |          |              |  |
| 128B ->130B      | 0.18772  |           |           |          |              |  |
| 129B ->130B      | -0.42271 |           |           |          |              |  |
| 129B ->131B      | 0.13793  |           |           |          |              |  |
| Excited State 4: | 2.347-A  | 2.3005 eV | 538.95 nm | f=0.0096 | <S**2>=1.127 |  |
| 129A ->132A      | -0.18899 |           |           |          |              |  |
| 130A ->131A      | 0.31113  |           |           |          |              |  |
| 130A ->132A      | 0.46316  |           |           |          |              |  |
| 130A ->133A      | 0.61721  |           |           |          |              |  |
| 128B ->130B      | 0.39436  |           |           |          |              |  |
| 128B ->132B      | 0.13140  |           |           |          |              |  |
| 129B ->132B      | 0.13658  |           |           |          |              |  |
| Excited State 5: | 2.558-A  | 2.4751 eV | 500.93 nm | f=0.0587 | <S**2>=1.386 |  |
| 128A ->132A      | 0.15856  |           |           |          |              |  |
| 128A ->133A      | 0.10029  |           |           |          |              |  |
| 129A ->131A      | 0.17115  |           |           |          |              |  |
| 129A ->132A      | -0.16117 |           |           |          |              |  |
| 130A ->132A      | -0.48947 |           |           |          |              |  |
| 130A ->133A      | -0.25106 |           |           |          |              |  |
| 130A ->134A      | 0.14432  |           |           |          |              |  |
| 127B ->130B      | -0.24447 |           |           |          |              |  |
| 127B ->131B      | -0.18121 |           |           |          |              |  |
| 128B ->130B      | 0.52475  |           |           |          |              |  |
| 128B ->132B      | 0.17376  |           |           |          |              |  |
| 129B ->130B      | 0.17912  |           |           |          |              |  |
| 129B ->131B      | 0.23190  |           |           |          |              |  |
| 129B ->132B      | 0.13491  |           |           |          |              |  |
| Excited State 6: | 2.223-A  | 2.6044 eV | 476.06 nm | f=0.0107 | <S**2>=0.986 |  |
| 129A ->132A      | 0.10390  |           |           |          |              |  |
| 130A ->132A      | -0.11723 |           |           |          |              |  |
| 130A ->134A      | -0.10601 |           |           |          |              |  |
| 127B ->130B      | 0.81408  |           |           |          |              |  |
| 128B ->130B      | 0.44223  |           |           |          |              |  |
| 129B ->132B      | -0.11541 |           |           |          |              |  |
| Excited State 7: | 2.776-A  | 2.6440 eV | 468.93 nm | f=0.0040 | <S**2>=1.676 |  |
| 127A ->131A      | -0.15176 |           |           |          |              |  |
| 128A ->131A      | -0.21914 |           |           |          |              |  |
| 128A ->132A      | -0.18087 |           |           |          |              |  |
| 128A ->133A      | -0.12349 |           |           |          |              |  |
| 129A ->131A      | -0.26544 |           |           |          |              |  |
| 129A ->132A      | 0.14769  |           |           |          |              |  |
| 130A ->131A      | -0.10898 |           |           |          |              |  |
| 127B ->130B      | -0.35851 |           |           |          |              |  |
| 127B ->131B      | 0.21472  |           |           |          |              |  |
| 128B ->130B      | 0.52757  |           |           |          |              |  |
| 128B ->131B      | 0.11380  |           |           |          |              |  |
| 128B ->132B      | -0.20731 |           |           |          |              |  |
| 128B ->133B      | -0.11146 |           |           |          |              |  |

129B ->130B           0.24577  
 129B ->131B           -0.28161

**e) MO energies for radicals 1[n]**

UB3LYP/6-311G(d,p) in CH2Cl2

**1[3]**

|                            |          |          |          |          |          |
|----------------------------|----------|----------|----------|----------|----------|
| Alpha occ. eigenvalues --  | -0.30960 | -0.28453 | -0.27556 | -0.27492 | -0.26244 |
| Alpha occ. eigenvalues --  | -0.25940 | -0.22972 | -0.17767 |          |          |
| Alpha virt. eigenvalues -- | -0.06414 | -0.03969 | -0.02294 | -0.01366 | -0.00543 |
| Alpha virt. eigenvalues -- | 0.01031  | 0.04223  | 0.05339  | 0.05594  | 0.06289  |
|                            |          |          |          |          |          |
| Beta occ. eigenvalues --   | -0.29761 | -0.27911 | -0.26929 | -0.26878 | -0.26242 |
| Beta occ. eigenvalues --   | -0.25337 | -0.22055 |          |          |          |
| Beta virt. eigenvalues --  | -0.10797 | -0.06001 | -0.03575 | -0.01799 | -0.01265 |
| Beta virt. eigenvalues --  | -0.00096 | 0.02106  | 0.04318  | 0.05369  | 0.05616  |

**1[4]**

|                            |          |          |          |          |          |
|----------------------------|----------|----------|----------|----------|----------|
| Alpha occ. eigenvalues --  | -0.26761 | -0.26436 | -0.26168 | -0.24937 | -0.22425 |
| Alpha occ. eigenvalues --  | -0.17516 |          |          |          |          |
| Alpha virt. eigenvalues -- | -0.06557 | -0.05984 | -0.03387 | -0.01458 | -0.00979 |
| Alpha virt. eigenvalues -- | -0.00535 | 0.01910  | 0.04589  | 0.05162  | 0.05326  |
|                            |          |          |          |          |          |
| Beta occ. eigenvalues --   | -0.26440 | -0.26223 | -0.25770 | -0.24489 | -0.21479 |
| Beta virt. eigenvalues --  | -0.10717 | -0.06158 | -0.05654 | -0.03080 | -0.01390 |
| Beta virt. eigenvalues --  | -0.00210 | -0.00104 | 0.02386  | 0.04657  | 0.05177  |

**1[5]**

|                            |          |          |          |          |          |
|----------------------------|----------|----------|----------|----------|----------|
| Alpha occ. eigenvalues --  | -0.29966 | -0.28549 | -0.27555 | -0.26385 | -0.26186 |
| Alpha occ. eigenvalues --  | -0.24895 | -0.23868 | -0.22438 | -0.17544 |          |
| Alpha virt. eigenvalues -- | -0.06511 | -0.05984 | -0.04995 | -0.02656 | -0.01382 |
| Alpha virt. eigenvalues -- | -0.00600 | 0.00702  | 0.01331  | 0.04503  | 0.04732  |
|                            |          |          |          |          |          |
| Beta occ. eigenvalues --   | -0.29395 | -0.28175 | -0.26947 | -0.26262 | -0.25726 |
| Beta occ. eigenvalues --   | -0.24473 | -0.23634 | -0.21548 |          |          |
| Beta virt. eigenvalues --  | -0.10926 | -0.06138 | -0.05736 | -0.04517 | -0.02324 |
| Beta virt. eigenvalues --  | -0.01336 | -0.00158 | 0.01360  | 0.01588  | 0.04562  |

**1[6]**

|                            |          |          |          |          |          |
|----------------------------|----------|----------|----------|----------|----------|
| Alpha occ. eigenvalues --  | -0.31933 | -0.30858 | -0.30214 | -0.27864 | -0.27528 |
| Alpha occ. eigenvalues --  | -0.27117 | -0.26222 | -0.25874 | -0.23909 | -0.23127 |
| Alpha occ. eigenvalues --  | -0.22008 | -0.17526 |          |          |          |
| Alpha virt. eigenvalues -- | -0.07187 | -0.06323 | -0.05525 | -0.03097 | -0.01728 |
|                            |          |          |          |          |          |
| Beta occ. eigenvalues --   | -0.31463 | -0.30522 | -0.29425 | -0.27519 | -0.26925 |
| Beta occ. eigenvalues --   | -0.26797 | -0.26225 | -0.25328 | -0.23688 | -0.22717 |
| Beta occ. eigenvalues --   | -0.21335 |          |          |          |          |
| Beta virt. eigenvalues --  | -0.10934 | -0.06951 | -0.06016 | -0.05120 | -0.02723 |

**1[7]**

|                            |          |          |          |          |          |
|----------------------------|----------|----------|----------|----------|----------|
| Alpha occ. eigenvalues --  | -0.28807 | -0.27467 | -0.26742 | -0.26197 | -0.26168 |
| Alpha occ. eigenvalues --  | -0.25381 | -0.23186 | -0.22611 | -0.21731 | -0.17427 |
| Alpha virt. eigenvalues -- | -0.07152 | -0.06664 | -0.06034 | -0.04339 | -0.01846 |
|                            |          |          |          |          |          |
| Beta occ. eigenvalues --   | -0.28410 | -0.26864 | -0.26465 | -0.26188 | -0.25746 |
| Beta occ. eigenvalues --   | -0.25002 | -0.22787 | -0.22389 | -0.21162 |          |
| Beta virt. eigenvalues --  | -0.10858 | -0.06930 | -0.06439 | -0.05616 | -0.04140 |

### f) TD-DFT calculation of electronic circular dichroism (ECD) results for radicals 1[6] and 1[7]

Results of TD-DFT calculations for **1[6]** and **1[7]** at the UB3LYP/6-311G(d,p)//UB3LYP/6-311G(d,p) level of theory using TD(NStates=90) in CH<sub>2</sub>Cl<sub>2</sub> dielectric medium are shown in Figures S37 and S38.

UV-vis peaks half-width at half-height set at 0.175 eV

$\Delta\epsilon$ , rotatory strengths ( $R_{vel} / 10^{-40} \text{ esu}^2\text{cm}^2$ )

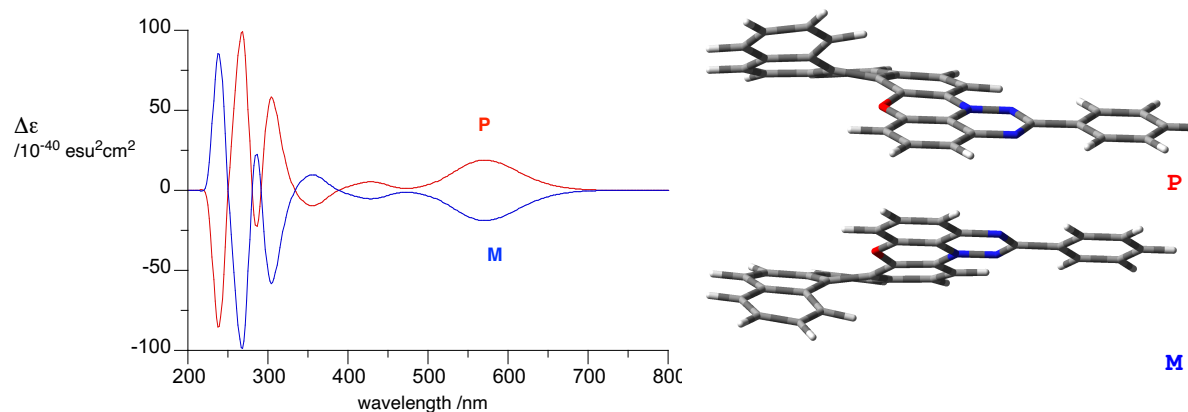

**Figure S37.** Right: Calculated (DFT) electronic circular dichroism spectra for two enantiomers of **1[6]** in CH<sub>2</sub>Cl<sub>2</sub> dielectric medium. Left: UB3LYP/6-311G(d,p) optimized structures of the two enantiomers.

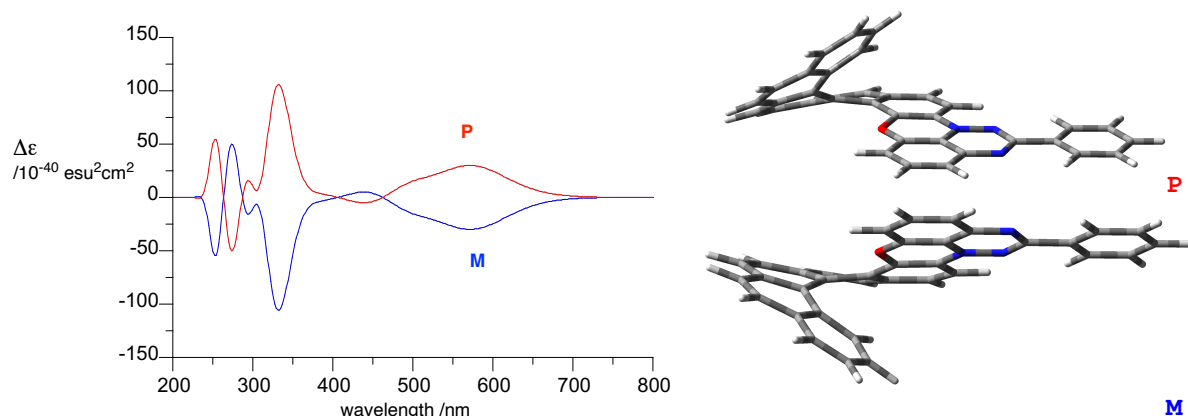

**Figure S38.** Right: Calculated (DFT) electronic circular dichroism spectra for two enantiomers of **1[7]** in CH<sub>2</sub>Cl<sub>2</sub> dielectric medium. Left: UB3LYP/6-311G(d,p) optimized structures of the two enantiomers.

## 10. Archive for DFT calculations

### 1 [3]

```
1\1\GINC-LOCALHOST\FOpt\UB3LYP\6-311G(d,p)\C19H12N3O1(2)\PIOTR\07-Aug-2024\0\#\#P UB3LYP/6-311G(d,p) FOpt=tight freq(noraman) SCF=Direct #P G eom=(NoDistance,NoAngle) fcheck\Parent C(8)-O-Ph(N1) benzotrazinyl (phenazinoBT), Cs\0,2\N,-0.2278877873,0.,-0.7084263176\N,1.6321910991,0.,1.3128825056\C,0.3129880577,0.,1.5111857835\N,-0.6503075981,0.,0.5768055176\C,2.8786535524,0.,-2.6902290381\C,1.5291389331,0.,-2.3803494856\C,1.1219316219,0.,-1.0442236245\C,2.0578378588,0.,0.0125543531\C,3.4247554582,0.,-0.3201118186\C,3.816972262,0.,-1.6491147022\C,-1.1822310988,0.,-1.7398126194\C,-0.7290760417,0.,-3.0714973973\C,-1.6371943064,0.,-4.1201994823\C,-3.0046875126,0.,-3.8560366366\C,-3.459870238,0.,-2
```

.5383765587\C,-2.5557251842,0.,-1.4827298838\C,-0.1683642447,0.,2.9196786726\C,-1.5360822218,0.,3.2244211726\C,-1.9623219845,0.,4.5480071083\C,-1.0314057238,0.,5.5858369247\C,0.3306622795,0.,5.2903077622\C,0.760909599,0.,3.9678089319\O,0.6085245667,0.,-3.4016442722\H,4.1444535006,0.,0.4880729973\H,-1.2511252521,0.,-5.131839092\H,-4.5225909432,0.,-2.328713281\H,-2.8831618771,0.,-0.4536580141\H,-2.2565015446,0.,2.4178291393\H,-3.0235523825,0.,4.77073054\H,1.0603303916,0.,6.0923893601\H,1.8146738821,0.,3.72378903\H,4.8719986175,0.,-1.8962881704\H,3.1797709288,0.,-3.7297147051\H,-3.7085837296,0.,-4.6792968653\H,-1.3657459375,0.,6.617402166\Version=ES64L-G16RevC.01\State=2-A"\HF=-970.9224068\S2=0.765181\S2-1=0.\S2A=0.750177\RMSD=6.549e-09\RMSF=4.240e-06\Dipole=-0.3140391,0.,-0.7901217\Quadrupole=6.2148761,-11.0265678,4.8116917,0.,-0.4622123,0.\PG=CS [SG(C19H12N3O1)]\

**1[4]**

1\1\GINC-LOCALHOST\FOpt\UB3LYP\6-311G(d,p)\C23H14N3O1(2)\PIOTR\27-Jul-2024\0\#\#P UB3LYP/6-311G(d,p) FOpt=tight freq(noraman) SCF=Direct #P Geom=(NoDistance,NoAngle) fcheck SCRF(Solvent=CH2Cl2)\benzotrazinyl 1,2-naphthyl, Cs, Smiles\0,2\N,0.1360787742,-0.1732928935,0.\N,1.4700786957,-2.579376815,0.\C,0.1407303001,-2.4582983309,0.\N,-0.5749400497,-1.3247903862,0.\C,3.6195139616,1.026907499,0.\C,2.2346733602,1.0364571264,0.\C,1.527472918,-0.1669211033,0.\C,2.1901588663,-1.4126311102,0.\C,3.596574715,-1.406536373,0.\C,4.2886020228,-0.2044366529,0.\C,-0.5447192359,1.0538984021,0.\C,0.1953693831,2.2294397141,0.\C,-0.4411620144,3.4963909334,0.\C,-1.8711663155,3.5394103616,0.\C,-1.9607180393,1.110402639,0.\C,-0.6643740691,-3.7124427496,0.\C,-2.0662901119,-3.6799879334,0.\C,-2.7993780121,-4.8625573522,0.\C,-2.1461798709,-6.0951623121,0.\C,-0.752339903,-6.1361747225,0.\C,-0.0163806121,-4.9550600471,0.\O,1.5720654166,2.2416815271,0.\H,4.113728359,-2.3574324306,0.\H,-2.5071611261,0.1791790193,0.\H,-2.5741074111,-2.7250273833,0.\H,-3.8828284371,-4.8223342211,0.\H,-0.2369127296,-7.0900143053,0.\H,1.0649085526,-4.9772109182,0.\H,5.3719138371,-0.2104331548,0.\H,4.1575727056,1.9658695646,0.\H,-2.7190897672,-7.0156090553,0.\C,0.2925022529,4.7118294854,0.\C,-0.3667795771,5.9184122106,0.\C,-2.5124550821,4.8027136952,0.\C,-1.7797186384,5.9669777393,0.\C,-2.6009754505,2.3199954643,0.\H,0.2004920866,6.8419337252,0.\H,-2.2835851561,6.926481403,0.\H,1.3736184112,4.6752417587,0.\H,-3.5964857216,4.8350803838,0.\H,-3.6841187879,2.3567933784,0.\Version=ES64L-G16RevC.01\State=2-A"\HF=-1124.6058951\S2=0.765927\S2-1=0.\S2A=0.750207\RMSD=7.163e-09\RMSF=1.315e-06\Dipole=-0.1991871,1.4390989,0.\Quadrupole=9.1165202,6.0167656,-15.1332858,1.1490935,0.,0.\PG=CS [SG(C23H14N3O1)]\

**1[5]**

1\1\GINC-LOCALHOST\FOpt\UB3LYP\6-311G(d,p)\C27H16N3O1(2)\PIOTR\30-Jul-2024\0\#\#P UB3LYP/6-311G(d,p) FOpt=tight SCF=Direct SCRF(Solvent=CH2CL2) #P Geom=(NoDistance,NoAngle) fcheck freq(noraman)\[5]helicene, Cs isomerised via Smiles rearr\0,2\O,1.4965615712,1.3025364014,0.\N,-2.198945109,-0.56955949,0.\C,-4.5872428134,-0.4939075499,0.\N,-0.9990546358,0.0589568935,0.\C,-5.782092744,0.2385777345,0.\N,-3.3103382448,1.5572054621,0.\C,-7.0112021734,-0.414032096,0.\C,-7.0666070409,-1.8073797099,0.\C,-5.8821968914,-2.5442696395,0.\C,-4.6518007774,-1.8946648529,0.\C,-3.2803793458,0.2227005745,0.\C,-0.9018233928,1.442821531,0.\C,-2.0965217726,2.1932135472,0.\C,0.1740966594,-0.7149059224,0.\C,1.4214906635,-0.0734507535,0.\C,0.3479999354,2.0562933595,0.\C,0.0947099984,-2.1172693774,0.\C,1.2506712673,-2.8520448294,0.\C,2.5193160286,-2.233318383,0.\C,2.6401513692,-0.8058321849,0.\C,-1.9869719498,3.5952556335,0.\C,0.4425898857,3.438300716,0.\C,-0.7366293381,4.1959933588,0.\C,3.6853959156,-3.0600766868,0.\C,3.9867679371,-0.2196842278,0.\C,5.1139164278,-1.1031907854,0.\C,4.9284449435,-2.5221172845,0.\C,4.2701199722,1.1698467023,0.\C,5.5663850534,1.6512052674,0.\C,6.6605155203,0.7746668064,0.\C,6.4274324462,-0.5829011533,0.\H,-5.7299982301,1.3189322205,0.\H

, -7.9271214379, 0.1660913915, 0.\H, -8.0244592861, -2.3152736803, 0.\H, -5.9169906603, -3.6278928814, 0.\H, -3.7343446414, -2.4674143593, 0.\H, -0.8796743794, -2.5809958435, 0.\H, 1.2013653709, -3.9344209683, 0.\H, -2.8965468459, 4.1821120633, 0.\H, 1.4166061458, 3.9095373256, 0.\H, -0.6623442109, 5.2767476707, 0.\H, 3.5464449219, -4.1352785193, 0.\H, 5.8069607385, -3.1578480431, 0.\H, 7.6736584307, 1.1597671419, 0.\H, 7.2566189892, -1.2821162521, 0.\H, 5.7313512506, 2.7227398566, 0.\H, 3.4642944784, 1.8798838156, 0.\Version=ES64L-G16RevC.01\State=2-A\HF=-1278.2791488\S2=0.765874\S2-1=0.\S2A=0.75021\RMSD=3.691e-09\RMSF=3.357e-06\Dipole=1.3144464, -0.1980755, 0.\Quadrupole=4.5997758, 11.9545776, -16.5543534, 2.4902042, 0., 0.\PG=CS [SG(C27H16N3O1)]\

### 1[6]-M

1\1\GINC-LOCALHOST\FOpt\UB3LYP\6-311G(d,p)\C31H18N3O1(2)\PIOTR\31-Jul-2024\0\#\P UB3LYP/6-311G(d,p) FOpt=tight SCF=Direct SCRF(Solvent=CH2CL2) #P Geom=(NoDistance,NoAngle) fcheck\ [6]helicene isomerised via Smiles rearr, M enantiomer\ \0,2\O, -0.8750148894, -0.3434853845, 0.9657667243\N, 3.042632529, 0.6571381119, 0.0320589026\C, 5.3679495532, 0.1202375902, -0.095027592\N, 1.7684139709, 0.3115468842, 0.3321727845\C, 6.4229893212, -0.7777435144, 0.1164840893\N, 3.7915676305, -1.5112187727, 0.7356647\C, 7.7299225343, -0.4202002, -0.2008147058\C, 8.0038438981, 0.8386751118, -0.7344210399\C, 6.9595723521, 1.7382515445, -0.9492180457\C, 5.651841017, 1.3838086796, -0.6327362075\C, 3.9749981089, -0.2812558312, 0.2510855322\C, 1.4509884127, -0.9397284912, 0.8452585008\C, 2.5028334692, -1.8577203566, 1.0485142462\C, 0.7404648351, 1.24258352, 0.1161711781\C, -0.5821014935, 0.8660782675, 0.3769428734\C, 0.1308470823, -1.2567288332, 1.1615862682\C, 1.0331036559, 2.5502781311, -0.3171677684\C, 0.0214155851, 3.4716826521, -0.3948947704\C, -1.3204477175, 3.1170516028, -0.1248132307\C, -1.6657182352, 1.7513300227, 0.1375834418\C, 2.1766027632, -3.1180886644, 1.5804852457\C, -0.1763992936, -2.5012704953, 1.6867907875\C, 0.8595286341, -3.4227656142, 1.8921797848\C, -2.3185845513, 4.1278613556, -0.0140788696\C, -3.0742791127, 1.4001143455, 0.2656677961\C, -3.9808595218, 2.4512003013, 0.5457246337\C, -3.5747594196, 3.8134195985, 0.4035228968\C, -3.6307036256, 0.0778385323, 0.0453152099\C, -4.9782904099, -0.1861271447, 0.4453883498\C, -5.7897274463, 0.8780401975, 0.9411812704\C, -5.327413442, 2.1569190939, 0.9237170019\C, -2.9571392955, -0.9431284667, -0.6723683136\C, -3.5304703112, -2.1788357237, -0.8807464874\C, -4.814068526, -2.4671991086, -0.3771583196\C, -5.5269458824, -1.4783959882, 0.2613234695\H, 6.2012398746, -1.7523147532, 0.5299771197\H, 8.5357828668, -1.1253751676, -0.0311579883\H, 9.0222017214, 1.1167647761, -0.9815184078\H, 7.1642858685, 2.7185024065, -1.3647472222\H, 4.8431617797, 2.0819164931, -0.8015494053\H, 2.0611609617, 2.8108283118, -0.5174290882\H, 0.2482704337, 4.5032654519, -0.6371528726\H, 2.9753762724, -3.8309413287, 1.7403637256\H, -1.2039478619, -2.7368173896, 1.9296732247\H, 0.6188553606, -4.395724371, 2.3034159874\H, -2.0348346953, 5.1573291394, -0.2006517214\H, -4.3090585348, 4.5911770642, 0.581124338\H, -6.8034230331, 0.6586879229, 1.2581714772\H, -5.973667304, 2.9824259305, 1.2010700607\H, -5.2496817205, -3.4482945519, -0.5274404231\H, -6.5399885031, -1.6634521633, 0.6023919364\H, -2.9926507556, -2.9295738236, -1.448454115\H, -1.9893097404, -0.7394165304, -1.1064805428\Version=ES64L-G16RevC.01\State=2-A\HF=-1431.9435142\S2=0.766473\S2-1=0.\S2A=0.750228\RMSD=2.499e-09\RMSF=8.094e-07\Dipole=-1.3487091, 0.4966875, -0.0181556\Quadrupole=3.5926448, 10.6665606, -14.2592054, 3.1473505, -5.5344043, -3.629379\PG=C01 [X(C31H18N3O1)]\

### 1[6]-P

1\1\GINC-LOCALHOST\FOpt\UB3LYP\6-311G(d,p)\C31H18N3O1(2)\PIOTR\30-Jul-2024\0\#\P UB3LYP/6-311G(d,p) FOpt=tight SCF=Direct SCRF(Solvent=CH2CL2) #P Geom=(NoDistance,NoAngle) fcheck freq(noraman)\ [6]helicene isomerised via Smiles rearr, P isomer\ \0,2\O, -0.8750160473, -0.3434867383, -0.9657662644\N, 3.0426307128, 0.657139871, -0.0320590158\C, 5.3679482397, 0.1202413497, 0.0950267334\N, 1.7684123875, 0.3115476296, -0.3321727193\C, 6.4229887545, -0.7777387298, -0.1164855743\N, 3.7915675571, -1.5112160972, -

0.7356657826\C,7.7299217282,-0.4201943806,0.2008130414\C,8.0038421035,  
0.8386809582,0.7344198193\C,6.9595698098,1.7382563735,0.9492174505\C,5  
.6518387117,1.3838124731,0.6327357923\C,3.974997067,-0.2812531713,-0.2  
510862085\C,1.4509878097,-0.939727838,-0.8452588172\C,2.5028336267,-1.  
8577187018,-1.0485151497\C,0.7404624833,1.242583282,-0.116170531\C,-0.  
5821035759,0.8660769588,-0.3769420462\C,0.130846683,-1.2567292278,-1.1  
615863849\C,1.0331002559,2.5502779943,0.3171688178\C,0.0214113919,3.47  
1681596,0.3948963952\C,-1.320451663,3.1170494619,0.1248150492\C,-1.665  
7210403,1.7513276726,-0.1375820345\C,2.1766039047,-3.1180871022,-1.580  
4865332\C,-0.1763987214,-2.5012709682,-1.686791287\C,0.8595299697,-3.4  
227650986,-1.8921808695\C,-2.318589414,4.1278583753,0.014081293\C,-3.0  
74281639,1.4001108005,-0.2656661775\C,-3.9808630415,2.4511960587,-0.54  
57224173\C,-3.5747641055,3.8134156623,-0.4035202856\C,-3.6307049338,0.  
0778344173,-0.0453139355\C,-4.9782915818,-0.1861323024,-0.4453868463\C  
, -5.7897296751,0.8780345039,-0.9411791873\C,-5.3274167933,2.1569138013  
, -0.923714568\C,-2.9571395313,-0.9431322477,0.6723690568\C,-3.53046940  
81,-2.1788400852,0.8807469221\C,-4.8140674901,-2.4672044189,0.37715895  
92\C,-5.5269458715,-1.4784016959,-0.2613223008\H,6.2012400728,-1.75230  
99985,-0.5299789444\H,8.5357826465,-1.1253685615,0.0311558369\H,9.0221  
997406,1.1167714287,0.9815170475\H,7.1642825564,2.7185072484,1.3647469  
76\H,4.8431588947,2.0819194975,0.8015494761\H,2.0611573803,2.810829008  
7,0.5174299846\H,0.2482653898,4.5032645081,0.6371548156\H,2.9753780038  
, -3.8309390042,-1.7403654646\H,-1.2039471399,-2.7368186799,-1.92967356  
49\H,0.6188574556,-4.3957239169,-2.3034173711\H,-2.0348404205,5.157326  
3417,0.2006544489\H,-4.3090639485,4.5911725452,-0.5811212694\H,-6.8034  
251449,0.6586814508,-1.2581692294\H,-5.9736714495,2.9824201686,-1.2010  
671734\H,-5.2496797841,-3.4483003002,0.5274408132\H,-6.5398844113,-1.6  
634586404,-0.6023905906\H,-2.9926490544,-2.9295779165,1.4484541487\H,-  
1.9893100511,-0.7394196158,1.1064811266\Version=ES64L-G16RevC.01\Stat  
e=2-A\HF=-1431.9435142\S2=0.766473\S2-1=0.\S2A=0.750228\RMSD=2.501e-09  
\RMSF=8.094e-07\Dipole=-1.3487095,0.4966863,0.0181561\Quadrupole=3.592  
6419,10.6665633,-14.2592052,3.1473431,5.5343979,3.6293924\PG=C01 [X(C3  
1H18N3O1)]\@

## 1[7]-M

1\1\GINC-LOCALHOST\FOpt\UB3LYP\6-311G(d,p)\C35H20N3O1(2)\PIOTR\01-Aug-  
2024\0\#\#P UB3LYP/6-311G(d,p) FOpt=tight SCF=Direct SCRF(Solvent=CH2CL  
2) #P Geom=(NoDistance,NoAngle) fcheck\[\[7]helicene isomerised via Smi  
les rearr, M enantiomer\]\0,2\O,-0.906994406,-0.36555003,0.7567180553\N  
,3.0444258874,0.6641192623,0.0166353144\C,5.374875919,0.1374158606,-0.  
017314394\N,1.7597661047,0.3101882675,0.2562486536\C,6.4241094802,-0.7  
595661785,0.2247463248\N,3.7694198751,-1.5157901937,0.7096293081\C,7.7  
422265972,-0.3900157076,-0.0255696933\C,8.033441586,0.8802408648,-0.52  
16905752\C,6.9952000993,1.7792057356,-0.7661238838\C,5.6763728257,1.41  
2682825,-0.5165271273\C,3.9694774368,-0.2760848869,0.2578533969\C,1.42  
42191407,-0.9517970094,0.7299150712\C,2.4690928076,-1.8717187039,0.958  
8788727\C,0.7397912038,1.2458833393,0.0235411779\C,-0.5893369349,0.867  
9190193,0.2420763136\C,0.092235832,-1.2792832132,0.9786862779\C,1.0444  
049639,2.5567911163,-0.3912047402\C,0.0346449265,3.4780486643,-0.49703  
48877\C,-1.3129534248,3.1240790257,-0.2566375831\C,-1.6636032195,1.759  
1703381,-0.0062921681\C,2.1240809996,-3.1438706352,1.4487941012\C,-0.2  
332763048,-2.5352432793,1.4636763709\C,0.795317069,-3.4585480128,1.694  
5435099\C,-2.3115688289,4.1367488196,-0.1540366174\C,-3.0738913305,1.4  
035332733,0.1299650022\C,-3.9593428541,2.463910796,0.4691869314\C,-3.5  
580477625,3.8244670921,0.2903029968\C,-3.6438198808,0.0839315913,-0.03  
46696277\C,-4.8905031804,-0.1818667332,0.5939987432\C,-5.6653032685,0.  
8834868298,1.1284724958\C,-5.2558158692,2.17525701,0.9759324676\C,-3.0  
994001881,-0.958131941,-0.8954610528\C,-3.6417412862,-2.2773017357,-0.  
8269022155\C,-4.7684898387,-2.5393745233,0.0133017599\C,-5.399826738,-  
1.5180919389,0.6486876\C,-2.1296823184,-0.7084639643,-1.8970291163\C,-  
1.655686216,-1.712469838,-2.7149540618\C,-2.1283347935,-3.0307064845,-

2.57493758\C,-3.1135762681,-3.299268589,-1.6518030832\H,6.1893387351,-1.7426866621,0.6095834988\H,8.5432591603,-1.0947489482,0.1672386057\H,9.0605178412,1.1676499581,-0.7165476479\H,7.2133053818,2.768483321,-1.1524513654\H,4.8724984236,2.1105944079,-0.7075536463\H,2.0775528723,2.8184523678,-0.5617439433\H,0.2678730735,4.5098887359,-0.7319355248\H,2.9174891117,-3.85811327,1.62815052\H,-1.2700983396,-2.7789000018,1.6531248091\H,0.5398082362,-4.4409166967,2.073205839\H,-2.0300805358,5.1650107479,-0.350305976\H,-4.2872697371,4.6028826078,0.4853171055\H,-6.6196110828,0.6539498743,1.5894310549\H,-5.8928191771,3.0007947939,1.2730532261\H,-5.1515845954,-3.5523134412,0.0728617839\H,-6.3121016661,-1.6944200357,1.2081481181\H,-1.7641934668,0.2977337403,-2.0458978438\H,-0.921378094,-1.4799314286,-3.4778473459\H,-1.7407850647,-3.819087063,-3.2098343781\H,-3.5254719191,-4.29906014,-1.5636862273\Version=ES64L-G16RevC.01\State=2-A\HF=-1585.613896\S2=0.766278\S2-1=0.\S2A=0.750223\RMSD=6.871e-09\RMSF=8.894e-07\Dipole=-1.4169831,0.4636165,-0.026486\Quadrupole=0.7611551,12.6822541,-13.4434091,3.6280597,-8.9411863,-2.8853774\PG=C01 [X(C35H20N3O1)]\@

### 1[7]-P

1\1\GINC-LOCALHOST\FOpt\UB3LYP\6-311G(d,p)\C35H20N3O1(2)\PIOTR\31-Jul-2024\0\#\#P UB3LYP/6-311G(d,p) FOpt=tight SCF=Direct SCRF(Solvent=CH2CL2) #P Geom=(NoDistance,NoAngle) fcheck\7\helicene isomerised via Smiles rearr\0,2\O,-0.9069941947,-0.3655511175,-0.7567171712\N,3.0444254714,0.6641220601,-0.0166363871\C,5.3748760295,0.137420905,0.0173123038\N,1.7597659305,0.3101898464,-0.2562492132\C,6.4241102942,-0.7595603683,-0.2247482011\N,3.7694212576,-1.5157866868,-0.7096307299\C,7.7422271573,-0.3900086511,0.0255673184\C,8.0334411887,0.880248428,0.5216874611\C,6.9951990005,1.7792125516,0.7661205333\C,5.6763719756,1.4126883889,0.5165242911\C,3.9694778223,-0.2760811885,-0.2578549042\C,1.4242199591,-0.9517957967,-0.7299153421\C,2.4690944116,-1.87171649,-0.9588796064\C,0.739790231,1.2458839544,-0.0235413369\C,-0.589337656,0.8679183061,-0.242075723\C,0.0922368415,-1.2792833375,-0.9786858335\C,1.0444029243,2.5567920839,0.3912042491\C,0.0346420381,3.478048652,0.4970348218\C,-1.3129560934,3.1240776603,0.2566382953\C,-1.6636046899,1.7591685989,0.0062932303\C,2.124083599,-3.1438687983,-1.4487945504\C,-0.233274311,-2.5352437679,-1.4636756484\C,0.7953198521,-3.4585475063,-1.6945432419\C,-2.3115725486,4.136746463,0.1540377603\C,-3.0738925268,1.4035301311,-0.129963128\C,-3.9593452807,2.4639067501,-0.469184674\C,-3.5580514211,3.8244634619,-0.2903011234\C,-3.6438196879,0.0839279014,0.0346719485\C,-4.8905030964,-0.1818717044,-0.5939956708\C,-5.6653045324,0.8834810475,-1.1284690838\C,-5.2558183051,2.1752516435,-0.9759294325\C,-3.0993984857,-0.9581350213,0.8954631719\C,-3.6417383553,-2.2773053489,0.8269047905\C,-4.768487137,-2.539379315,-0.0132985108\C,-5.3998253905,-1.5180974107,-0.6486840935\C,-2.1296802808,-0.7084660052,1.8970306583\C,-1.656827487,-1.7124713398,2.7149554401\C,-2.1283301386,-3.0307084522,2.5749393699\C,-3.1135718814,-3.2992716035,1.6518054674\H,6.1893402963,-1.7426812521,-0.6095848062\H,8.5432602662,-1.0947413228,-0.1672407869\H,9.0605172472,1.167658491,0.7165441422\H,7.2133035324,2.7684905329,1.1524474244\H,4.8724970315,2.1105993995,0.7075506246\H,2.0775506642,2.8184543744,0.5617428747\H,0.267869303,4.5098889806,0.7319351958\H,2.917492316,-3.858110671,-1.6281513205\H,-1.2700962034,-2.7789015325,-1.6531235257\H,0.5398117893,-4.4409164726,-2.0732053498\H,-2.0300851533,5.1650086904,0.3503068377\H,-4.2872742669,4.6028782408,-0.4853149181\H,-6.6196123968,0.6539431146,-1.5894270527\H,-5.8928225963,3.0007887712,-1.2730499072\H,-5.1515809466,-3.5523186093,-0.0728582015\H,-6.3121004724,-1.6944264468,-1.2081440636\H,-1.7641923072,0.2977320697,2.0458990692\H,-0.9213744128,-1.4799321402,3.4778482761\H,-1.7407792891,-3.8190885852,3.2098360341\H,-3.5254666236,-4.2990635566,1.5636889487\Version=ES64L-G16RevC.01\State=2-A\HF=-1585.613896\S2=0.766278\S2-1=0.\S2A=0.750223\RMSD=6.972e-09\RMSF=8.892e-07\Dipole=-1.4169836,0.463615,0.0264867\Quadrupole=0.7611578,12.6822641,-13.4434219,3.628048,8.9411771,2.8853

## 11. References

1. G. R. Fulmer, A. J. M. Miller, N. H. Sherden, H. E. Gottlieb, A. Nudelman, B. M. Stoltz, J. E. Bercaw and K. I. Goldberg, *Organometallics*, 2010, **29**, 2176–2179.
2. G. A. Zissimou, P. Bartos, A. Pietrzak and P. Kaszyński, *J. Org. Chem.*, 2022, **87**, 4829–4837.
3. P. Bartos, V. G. Young, Jr. and P. Kaszyński, *Org. Lett.*, 2020, **22**, 3835–3840.
4. P. Kaszyński, C. P. Constantinides and V. G. Young, Jr., *Angew. Chem., Int. Ed.*, 2016, **55**, 11149–11152.
5. A. Wu, Y. Duan, D. Xu, T. M. Penning and R. G. Harvey, *Tetrahedron*, 2010, **66**, 2111–2118.
6. M. Sako, Y. Takeuchi, T. Tsujihara, J. Koderu, T. Kawano, S. Takizawa and H. Sasai, *J. Am. Chem. Soc.*, 2016, **138**, 11481–11484.
7. K. Usui, K. Yamamoto, T. Shimizu, M. Okazumi, B. Mei, Y. Demizu, M. Kurihara and H. Suemune, *J. Org. Chem.*, 2015, **80**, 6502–6508.
8. T. Hartung, R. Machleid, M. Simon, C. Golz and M. Alcarazo, *Angew. Chem. Int. Ed.*, 2020, **59**, 5660–5664.
9. C. P. RigakuOD, Rigaku Oxford Diffraction Ltd, 2018, Yarnton, Oxfordshire, England.
10. G. M. Sheldrick, *Acta Cryst., Sect.*, 2015, **A71**, 3-8.
11. C. B. Hübschle, G. M. Sheldrick and B. Dittrich, *J. Appl. Cryst.*, 2011, **44**, 1281–1284.
12. G. M. Sheldrick, *Acta Cryst., Sect.*, 2015, **C71**, 3-8.
13. A. L. Spek, *Acta Cryst. C*, 2015, **C71**, 9–18.
14. A. Bodzioch, D. Pomikło, M. Celeda, A. Pietrzak and P. Kaszyński, *J. Org. Chem.*, 2019, **84**, 6377–6394.
15. P. Bartos, B. Anand, A. Pietrzak and P. Kaszyński, *Org. Lett.*, 2020, **22**, 180–184.
16. Gaussian 16, M. J. Frisch, G. W. Trucks, H. B. Schlegel, G. E. Scuseria, M. A. Robb, J. R. Cheeseman, G. Scalmani, V. Barone, G. A. Petersson, H. Nakatsuji, X. Li, M. Caricato, A. V. Marenich, J. Bloino, B. G. Janesko, R. Gomperts, B. Mennucci, H. P. Hratchian, J. V. Ortiz, A. F. Izmaylov, J. L. Sonnenberg, D. Williams-Young, F. Ding, F. Lipparini, F. Egidi, J. Goings, B. Peng, A. Petrone, T. Henderson, D. Ranasinghe, V. G. Zakrzewski, J. Gao, N. Rega, G. Zheng, W. Liang, M. Hada, M. Ehara, K. Toyota, R. Fukuda, J. Hasegawa, M. Ishida, T. Nakajima, Y. Honda, O. Kitao, H. Nakai, T. Vreven, K. Throssell, J. A. Montgomery, Jr., J. E. Peralta, F. Ogliaro, M. J. Bearpark, J. J. Heyd, E.



- N. Brothers, K. N. Kudin, V. N. Staroverov, T. A. Keith, R. Kobayashi, J. Normand, K. Raghavachari, A. P. Rendell, J. C. Burant, S. S. Iyengar, J. Tomasi, M. Cossi, J. M. Millam, M. Klene, C. Adamo, R. Cammi, J. W. Ochterski, R. L. Martin, K. Morokuma, O. Farkas, J. B. Foresman, and D. J. Fox, Gaussian, Inc., Wallingford CT. 2016,.
17. M. Cossi, G. Scalmani, N. Rega and V. Barone, *J. Chem. Phys.*, 2002, **117**, 43–54.
  18. F. De Vleeschouwer, A. Chankisijjev, W. Yang, P. Geerlings and F. De Proft, *J. Org. Chem.*, 2013, **78**, 3151–3158.
  19. R. E. Stratmann, G. E. Scuseria and M. J. Frisch, *J. Chem. Phys.*, 1998, **109**, 8218-8224.
